# Supplementary material for: An interactive database to explore herbicide physicochemical properties
Source: Royal Society of Chemistry journal article supplement (doi:10.1039/c5ob00469a), 2015-01-01
Supplement: c5ob00469a1.zip [file c5ob00469a1.zip]

## Sheet: Data
		Application Stage					SMILES strings and IUPAC Names		Physico-chemical properties (obtained from cxcalc)																																							Log P and Log S estimates
Name	Mode of action	Pre	Post	CAS RN	PNG	SVG	SMILES	IUPAC Name	Chemical Formula	Sortable Formula	Sortable Formula	C	H	H	As	Br	Cl	F	I	N	Na	O	P	S	Molar Mass (Da)	Atom Count (inc. H)	Aliphatic Atom Count	Aromatic Atom Count	Proportion of Aromatic Atoms	Rotatable Bond Count	H-Bond Acceptor Atoms at pH 7.4	H-Bond Donor Sites at pH 7.4	TPSA (Å²)	Formal Charge at pH 7.4	pH 1.4	pH 2.4	pH 3.4	pH 4.4	pH 5.4	pH 6.4	Log D at pH 7.4	pH 8.4	pH 9.4	pH 10.4	pH 11.4	pH 12.4	pH 13.4	ALogpS	Log S (exp)
MEAN																									312.347	35.6617	12.0719	8.51796	0.399713	4.59581	4.11377	0.667665	71.3268	-0.335329	2.64931	2.7274	2.69012	2.5556	2.37925	2.21656	2.13105	2.09677	2.06554	2.03617	2.0038	1.95326	1.86353	-3.92034	-3.43342
STANDARD DEVIATION																									90.5046	10.4882	4.51553	4.57911	0.182411	2.49336	2.69823	0.826418	39.728	0.537356	1.89503	1.84063	1.87335	1.99459	2.18084	2.3732	2.48058	2.51556	2.56089	2.59802	2.6206	2.63164	2.6549	1.21797	1.38782
FILTER BY:
2,4,5-T	Synthetic auxin			93-76-5	png	svg	OC(=O)COC1=C(Cl)C=C(Cl)C(Cl)=C1	2-(2,4,5-trichlorophenoxy)acetic acid	C8H5Cl3O3	C008H005Cl003O003	C008H005Cl003O003	8	5	5	0	0	3	0	0	0	0	3	0	0	255.483	19	8	6	0.428571	3	3	0	49.36	-1	3.08	2.88	2.21	1.27	0.35	-0.42	-0.42	-0.42	-0.42	-0.42	-0.42	-0.42	-0.42		-2.96
2,4-D	Synthetic auxin		Y	94-75-7	png	svg	OC(=O)COC1=CC=C(Cl)C=C1Cl	2-(2,4-dichlorophenoxy)acetic acid	C8H6Cl2O3	C008H006Cl002O003	C008H006Cl002O003	8	6	6	0	0	2	0	0	0	0	3	0	0	221.037	19	7	6	0.461538	3	3	0	49.36	-1	2.49	2.36	1.81	0.91	-0.04	-1.03	-1.03	-1.03	-1.03	-1.03	-1.03	-1.03	-1.03		-2.51
2,4-DB	Synthetic auxin		Y	94-82-6	png	svg	OC(=O)CCCOC1=C(Cl)C=C(Cl)C=C1	4-(2,4-dichlorophenoxy)butanoic acid	C10H10Cl2O3	C010H010Cl002O003	C010H010Cl002O003	10	10	10	0	0	2	0	0	0	0	3	0	0	249.091	25	9	6	0.4	5	3	0	49.36	-1	3.02	3	2.81	2.15	1.21	0.28	-0.5	-0.5	-0.5	-0.5	-0.5	-0.5	-0.5		-3.67
acetochlor	Inhibitor of cell division	Y		34256-82-1	png	svg	CCOCN(C(=O)CCl)C1=C(CC)C=CC=C1C	2-chloro-N-(ethoxymethyl)-N-(2-ethyl-6-methylphenyl)acetamide	C14H20ClNO2	C014H020Cl001N001O002	C014H020Cl001N001O002	14	20	20	0	0	1	0	0	1	0	2	0	0	269.767	38	12	6	0.333333	6	2	0	29.54	0	3.5	3.5	3.5	3.5	3.5	3.5	3.5	3.5	3.5	3.5	3.5	3.5	3.5	-3.04
acifluorfen	Inhibitor of protoporphyrinogen oxidase		Y	50594-66-6	png	svg	OC(=O)C1=CC(OC2=CC=C(C=C2Cl)C(F)(F)F)=CC=C1[N+]([O-])=O	5-[2-chloro-4-(trifluoromethyl)phenoxy]-2-nitrobenzoic acid	C14H7ClF3NO5	C014H007Cl001F003N001O005	C014H007Cl001F003N001O005	14	7	7	0	0	1	3	0	1	0	5	0	0	361.657	31	12	12	0.5	5	4	0	95.18	-1	4.46	4.03	3.17	2.21	1.02	1.02	1.02	1.02	1.02	1.02	1.02	1.02	1.02	-5.63
aclonifen	Inhibitor of pigment synthesis	Y		74070-46-5	png	svg	NC1=C(C=CC(OC2=CC=CC=C2)=C1Cl)[N+]([O-])=O	2-chloro-6-nitro-3-phenoxyaniline	C12H9ClN2O3	C012H009Cl001N002O003	C012H009Cl001N002O003	12	9	9	0	0	1	0	0	2	0	3	0	0	264.664	27	6	12	0.666667	3	3	2	81.07	0	3.84	3.84	3.84	3.84	3.84	3.84	3.84	3.84	3.84	3.84	3.83	3.8	3.55	-4.41
acrolein	Unknown mode of action			107-02-8	png	svg	C=CC=O	prop-2-enal	C3H4O	C003H004O001	C003H004O001	3	4	4	0	0	0	0	0	0	0	1	0	0	56.0633	8	4	0	0	1	1	0	17.07	0	0.37	0.37	0.37	0.37	0.37	0.37	0.37	0.37	0.37	0.37	0.37	0.37	0.37		0.57
alachlor	Inhibitor of cell division	Y		15972-60-8	png	svg	CCC1=CC=CC(CC)=C1N(COC)C(=O)CCl	2-chloro-N-(2,6-diethylphenyl)-N-(methoxymethyl)acetamide	C14H20ClNO2	C014H020Cl001N001O002	C014H020Cl001N001O002	14	20	20	0	0	1	0	0	1	0	2	0	0	269.767	38	12	6	0.333333	6	2	0	29.54	0	3.59	3.59	3.59	3.59	3.59	3.59	3.59	3.59	3.59	3.59	3.59	3.59	3.59		-3.26
allidochlor	Unknown mode of action	Y	Y	93-71-0	png	svg	ClCC(=O)N(CC=C)CC=C	2-chloro-N,N-bis(prop-2-en-1-yl)acetamide	C8H12ClNO	C008H012Cl001N001O001	C008H012Cl001N001O001	8	12	12	0	0	1	0	0	1	0	1	0	0	173.64	23	11	0	0	5	1	0	20.31	0	1.42	1.42	1.42	1.42	1.42	1.42	1.42	1.42	1.42	1.42	1.42	1.42	1.42		-0.95
alloxydim	Inhibitor of ACCase		Y	55634-91-8	png	svg	CCC\C(NOCC=C)=C1/C(=O)CC(C)(C)C(C(=O)OC)C1=O	methyl (5Z)-2,2-dimethyl-4,6-dioxo-5-{1-[(prop-2-en-1-yloxy)amino]butylidene}cyclohexane-1-carboxylate	C17H25NO5	C017H025N001O005	C017H025N001O005	17	25	25	0	0	0	0	0	1	0	5	0	0	323.384	48	23	0	0	8	5	1	81.7	0	2.07	2.56	2.66	2.67	2.61	2.27	1.46	0.51	-0.64	-0.64	-0.64	-0.65	-0.66	-3.03
ametryne	Inhibitor of photosynthesis	Y	Y	834-12-8	png	svg	CCNC1=NC(NC(C)C)=NC(SC)=N1	2-N-ethyl-6-(methylsulfanyl)-4-N-(propan-2-yl)-1,3,5-triazine-2,4-diamine	C9H17N5S	C009H017N005S001	C009H017N005S001	9	17	17	0	0	0	0	0	5	0	0	0	1	227.33	32	9	6	0.4	5	5	2	62.73	0	0.63	0.64	0.79	1.33	2.1	2.51	2.59	2.6	2.6	2.6	2.6	2.59	2.57		-3.04
amicarbazone	Inhibitor of photosynthesis	Y	Y	129909-90-6	png	svg	CC(C)C1=NN(C(=O)NC(C)(C)C)C(=O)N1N	4-amino-N-tert-butyl-5-oxo-3-(propan-2-yl)-4,5-dihydro-1H-1,2,4-triazole-1-carboxamide	C10H19N5O2	C010H019N005O002	C010H019N005O002	10	19	19	0	0	0	0	0	5	0	2	0	0	241.29	36	12	5	0.294118	2	4	3	91.03	0	-0.25	0.56	0.9	0.95	0.96	0.96	0.96	0.96	0.96	0.96	0.96	0.94	0.82	-2.18
amidosulfuron	Inhibitor of ALS		Y	120923-37-7	png	svg	COC1=CC(OC)=NC(NC(=O)NS(=O)(=O)N(C)S(C)(=O)=O)=N1	1-(4,6-dimethoxypyrimidin-2-yl)-3-[(N-methylmethanesulfonamido)sulfonyl]urea	C9H15N5O7S2	C009H015N005O007S002	C009H015N005O007S002	9	15	15	0	0	0	0	0	5	0	7	0	2	369.375	38	17	6	0.26087	3	10	1	154.09	-1	-1.23	-0.92	-1.2	-1.59	-1.69	-1.7	-1.7	-1.7	-1.7	-1.7	-1.7	-1.71	-1.78	-3.32
aminocyclopyrachlor	Synthetic auxin			858956-08-8	png	svg	NC1=NC(=NC(C(O)=O)=C1Cl)C1CC1	6-amino-5-chloro-2-cyclopropylpyrimidine-4-carboxylic acid	C8H8ClN3O2	C008H008Cl001N003O002	C008H008Cl001N003O002	8	8	8	0	0	1	0	0	3	0	2	0	0	213.621	22	8	6	0.428571	2	5	2	91.93	-1	-0.45	-0.4	-0.4	-0.4	-0.47	-0.84	-1.74	-1.92	-1.95	-1.95	-1.95	-1.95	-1.95	-1.8
aminopyralid	Synthetic auxin			150114-71-9	png	svg	NC1=CC(Cl)=NC(C(O)=O)=C1Cl	4-amino-3,6-dichloropyridine-2-carboxylic acid	C6H4Cl2N2O2	C006H004Cl002N002O002	C006H004Cl002N002O002	6	4	4	0	0	2	0	0	2	0	2	0	0	207.014	16	6	6	0.5	1	4	2	79.04	-1	0.86	0.96	0.94	0.66	-0.1	-1.03	-2.13	-2.13	-2.13	-2.13	-2.13	-2.13	-2.13	-2.02
amiprophos-methyl	Inhibitor of microtubule assembly			36001-88-4	png	svg	COP(=S)(NC(C)C)OC1=C(C=C(C)C=C1)[N+]([O-])=O	[methoxy(4-methyl-2-nitrophenoxy)sulfanylidene-λ⁵-phosphanyl](propan-2-yl)amine	C11H17N2O4PS	C011H017N002O004P001S001	C011H017N002O004P001S001	11	17	17	0	0	0	0	0	2	0	4	1	1	304.302	36	13	6	0.315789	6	2	1	76.31	0	3.11	3.16	3.17	3.17	3.17	3.17	3.17	3.14	2.94	2.46	2.19	2.15	2.15	-4.3
amitrole	Unknown mode of action			61-82-5	png	svg	NC1=NC=NN1	1H-1,2,4-triazol-5-amine	C2H4N4	C002H004N004	C002H004N004	2	4	4	0	0	0	0	0	4	0	0	0	0	84.08	10	1	5	0.833333	0	3	3	67.59	0	-1.42	-0.89	-0.61	-0.57	-0.56	-0.56	-0.56	-0.56	-0.56	-0.57	-0.59	-0.76	-1.34		0.52
anilofos	Inhibitor of cell division			64249-01-0	png	svg	COP(=S)(OC)SCC(=O)N(C(C)C)C1=CC=C(Cl)C=C1	dimethyl ({[(4-chlorophenyl)(propan-2-yl)carbamoyl]methyl}sulfanyl)(sulfanylidene)phosphonite	C13H19ClNO3PS2	C013H019Cl001N001O003P001S002	C013H019Cl001N001O003P001S002	13	19	19	0	0	1	0	0	1	0	3	1	2	367.852	40	15	6	0.285714	7	1	0	38.77	0	3.6	3.6	3.6	3.6	3.6	3.6	3.6	3.6	3.6	3.6	3.6	3.56	3.3	-5.51
asulam	Inhibitor of dihydropteroate synthase			3337-71-1	png	svg	COC(=O)NS(=O)(=O)C1=CC=C(N)C=C1	methyl N-(4-aminobenzenesulfonyl)carbamate	C8H10N2O4S	C008H010N002O004S001	C008H010N002O004S001	8	10	10	0	0	0	0	0	2	0	4	0	1	230.241	25	9	6	0.4	2	5	2	95.69	-1	-0.35	0.14	-0.08	-0.47	-0.57	-0.58	-0.58	-0.58	-0.58	-0.58	-0.58	-0.58	-0.58		-1.66
atrazine	Inhibitor of photosynthesis	Y	Y	1912-24-9	png	svg	CCNC1=NC(NC(C)C)=NC(Cl)=N1	6-chloro-2-N-ethyl-4-N-(propan-2-yl)-1,3,5-triazine-2,4-diamine	C8H14ClN5	C008H014Cl001N005	C008H014Cl001N005	8	14	14	0	0	1	0	0	5	0	0	0	0	215.683	28	8	6	0.428571	4	5	2	62.73	0	0.62	1.36	1.99	2.17	2.19	2.2	2.2	2.2	2.2	2.2	2.2	2.19	2.16		-3.55
azafenidin	Inhibitor of protoporphyrinogen oxidase	Y	Y	68049-83-2	png	svg	ClC1=CC(Cl)=C(C=C1OCC#C)N1N=C2CCCCN2C1=O	2-[2,4-dichloro-5-(prop-2-yn-1-yloxy)phenyl]-2H,3H,5H,6H,7H,8H-[1,2,4]triazolo[4,3-a]pyridin-3-one	C15H13Cl2N3O2	C015H013Cl002N003O002	C015H013Cl002N003O002	15	13	13	0	0	2	0	0	3	0	2	0	0	338.189	35	11	11	0.5	3	3	0	45.14	0	3.5	3.5	3.5	3.5	3.5	3.5	3.5	3.5	3.5	3.5	3.5	3.5	3.5	-4.14
azimsulfuron	Inhibitor of ALS		Y	120162-55-2	png	svg	COC1=CC(OC)=NC(NC(=O)NS(=O)(=O)C2=C(C=NN2C)C2=NN(C)N=N2)=N1	1-(4,6-dimethoxypyrimidin-2-yl)-3-{[1-methyl-4-(2-methyl-2H-1,2,3,4-tetrazol-5-yl)-1H-pyrazol-5-yl]sulfonyl}urea	C13H16N10O5S	C013H016N010O005S001	C013H016N010O005S001	13	16	16	0	0	0	0	0	10	0	5	0	1	424.395	45	13	16	0.551724	5	12	1	178.13	-1	0.25	0.63	0.69	0.63	0.27	-0.19	-0.33	-0.35	-0.35	-0.35	-0.35	-0.35	-0.36	-2.61
beflubutamid	Inhibitor of pigment synthesis	Y	Y	113614-08-7	png	svg	CCC(OC1=CC(=C(F)C=C1)C(F)(F)F)C(=O)NCC1=CC=CC=C1	N-benzyl-2-[4-fluoro-3-(trifluoromethyl)phenoxy]butanamide	C18H17F4NO2	C018H017F004N001O002	C018H017F004N001O002	18	17	17	0	0	0	4	0	1	0	2	0	0	355.327	42	13	12	0.48	7	2	1	38.33	0	4.55	4.55	4.55	4.55	4.55	4.55	4.55	4.55	4.55	4.54	4.45	4.07	3.7	-4.98
benazolin	Synthetic auxin		Y	3813-05-6	png	svg	OC(=O)CN1C(=O)SC2=C1C(Cl)=CC=C2	2-(4-chloro-2-oxo-2,3-dihydro-1,3-benzothiazol-3-yl)acetic acid	C9H6ClNO3S	C009H006Cl001N001O003S001	C009H006Cl001N001O003S001	9	6	6	0	0	1	0	0	1	0	3	0	1	243.667	21	6	9	0.6	2	4	0	60.44	-1	1.93	1.86	1.46	0.61	-0.35	-1.59	-1.59	-1.59	-1.59	-1.59	-1.59	-1.59	-1.59		-2.61
benazolin-ethyl	Synthetic auxin		Y	25059-80-7	png	svg	CCOC(=O)CN1C(=O)SC2=C1C(Cl)=CC=C2	ethyl 2-(4-chloro-2-oxo-2,3-dihydro-1,3-benzothiazol-3-yl)acetate	C11H10ClNO3S	C011H010Cl001N001O003S001	C011H010Cl001N001O003S001	11	10	10	0	0	1	0	0	1	0	3	0	1	271.72	27	8	9	0.529412	4	3	0	46.61	0	2.44	2.44	2.44	2.44	2.44	2.44	2.44	2.44	2.44	2.44	2.44	2.44	2.44	-3.18
benfluralin	Inhibitor of microtubule assembly	Y		1861-40-1	png	svg	CCCCN(CC)C1=C(C=C(C=C1[N+]([O-])=O)C(F)(F)F)[N+]([O-])=O	N-butyl-N-ethyl-2,6-dinitro-4-(trifluoromethyl)aniline	C13H16F3N3O4	C013H016F003N003O004	C013H016F003N003O004	13	16	16	0	0	0	3	0	3	0	4	0	0	335.279	39	17	6	0.26087	8	5	0	94.88	0	4.52	4.52	4.52	4.52	4.52	4.52	4.52	4.52	4.52	4.52	4.52	4.52	4.52		-5.53
benfuresate	Inhibitor of lipid synthesis		Y	68505-69-1	png	svg	CCS(=O)(=O)OC1=CC2=C(OCC2(C)C)C=C1	3,3-dimethyl-2,3-dihydro-1-benzofuran-5-yl ethane-1-sulfonate	C12H16O4S	C012H016O004S001	C012H016O004S001	12	16	16	0	0	0	0	0	0	0	4	0	1	256.318	33	11	6	0.352941	3	3	0	52.6	0	2.21	2.21	2.21	2.21	2.21	2.21	2.21	2.21	2.21	2.21	2.21	2.21	2.21	-3.21
bensulfuron-methyl	Inhibitor of ALS	Y	Y	83055-99-6	png	svg	COC(=O)C1=CC=CC=C1CS(=O)(=O)NC(=O)NC1=NC(OC)=CC(OC)=N1	methyl 2-[({[(4,6-dimethoxypyrimidin-2-yl)carbamoyl]amino}sulfonyl)methyl]benzoate	C16H18N4O7S	C016H018N004O007S001	C016H018N004O007S001	16	18	18	0	0	0	0	0	4	0	7	0	1	410.402	46	16	12	0.428571	7	9	1	143.01	-1	1.41	1.74	1.55	1.11	0.95	0.93	0.93	0.93	0.93	0.93	0.93	0.93	0.92	-4.16
bensulide	Inhibitor of lipid synthesis	Y		741-58-2	png	svg	CC(C)OP(=S)(OC(C)C)SCCNS(=O)(=O)C1=CC=CC=C1	bis(propan-2-yl) [(2-benzenesulfonamidoethyl)sulfanyl](sulfanylidene)phosphonite	C14H24NO4PS3	C014H024N001O004P001S003	C014H024N001O004P001S003	14	24	24	0	0	0	0	0	1	0	4	1	3	397.513	47	17	6	0.26087	9	2	1	64.63	0	3.45	3.45	3.45	3.45	3.45	3.45	3.45	3.44	3.39	3.1	2.66	2.53	2.51		-4.2
bentazon	Inhibitor of photosynthesis			25057-89-0	png	svg	CC(C)N1C(=O)C2=C(NS1(=O)=O)C=CC=C2	3-(propan-2-yl)-3,4-dihydro-1H-2λ⁶,1,3-benzothiadiazine-2,2,4-trione	C10H12N2O3S	C010H012N002O003S001	C010H012N002O003S001	10	12	12	0	0	0	0	0	2	0	3	0	1	240.279	28	10	6	0.375	1	3	1	66.48	0	0.76	0.76	0.76	0.76	0.76	0.75	0.68	0.33	-0.07	-0.17	-0.19	-0.19	-0.19		-2.68
benthiocarb	Inhibitor of lipid synthesis	Y	Y	28249-77-6	png	svg	CCN(CC)C(=O)SCC1=CC=C(Cl)C=C1	N,N-diethyl{[(4-chlorophenyl)methyl]sulfanyl}formamide	C12H16ClNOS	C012H016Cl001N001O001S001	C012H016Cl001N001O001S001	12	16	16	0	0	1	0	0	1	0	1	0	1	257.78	32	10	6	0.375	5	1	0	20.31	0	3.73	3.73	3.73	3.73	3.73	3.73	3.73	3.73	3.73	3.73	3.73	3.73	3.73	-4.16
benzfendizone	Inhibitor of protoporphyrinogen oxidase		Y	158755-95-4	png	svg	CCC1=CC(OC(C)C(=O)OC)=C(COC2=CC=C(C=C2)N2C(=O)C=C(N(C)C2=O)C(F)(F)F)C=C1	methyl 2-(5-ethyl-2-{4-[3-methyl-2,6-dioxo-4-(trifluoromethyl)-1,2,3,6-tetrahydropyrimidin-1-yl]phenoxymethyl}phenoxy)propanoate	C25H25F3N2O6	C025H025F003N002O006	C025H025F003N002O006	25	25	25	0	0	0	3	0	2	0	6	0	0	506.471	61	18	18	0.5	10	5	0	85.38	0	4.6	4.61	4.61	4.61	4.61	4.61	4.61	4.61	4.61	4.61	4.61	4.61	4.61	-6.4
benzobicyclon	Inhibitor of pigment synthesis	Y	Y	156963-66-5	png	svg	CS(=O)(=O)C1=CC(Cl)=C(C=C1)C(=O)C1=C(SC2=CC=CC=C2)C2CCC(C2)C1=O	3-(2-chloro-4-methanesulfonylbenzoyl)-4-(phenylsulfanyl)bicyclo[3.2.1]oct-3-en-2-one	C22H19ClO4S2	C022H019Cl001O004S002	C022H019Cl001O004S002	22	19	19	0	0	1	0	0	0	0	4	0	2	446.967	48	17	12	0.413793	5	4	0	68.28	0	4.17	4.17	4.17	4.17	4.17	4.17	4.17	4.17	4.17	4.17	4.17	4.17	4.17	-5.71
benzofenap	Inhibitor of pigment synthesis			82692-44-2	png	svg	CN1N=C(C)C(C(=O)C2=C(Cl)C(C)=C(Cl)C=C2)=C1OCC(=O)C1=CC=C(C)C=C1	2-{[4-(2,4-dichloro-3-methylbenzoyl)-1,3-dimethyl-1H-pyrazol-5-yl]oxy}-1-(4-methylphenyl)ethan-1-one	C22H20Cl2N2O3	C022H020Cl002N002O003	C022H020Cl002N002O003	22	20	20	0	0	2	0	0	2	0	3	0	0	431.312	49	12	17	0.586207	6	4	0	61.19	0	4.49	5.16	5.36	5.39	5.39	5.39	5.39	5.39	5.39	5.39	5.39	5.39	5.39	-5.95
bicyclopyrone	Unknown mode of action			352010-68-5	png	svg	COCCOCC1=C(C=CC(=N1)C(F)(F)F)C(O)=C1C(=O)C2CCC(C2)C1=O	3-[hydroxy({2-[(2-methoxyethoxy)methyl]-6-(trifluoromethyl)pyridin-3-yl})methylidene]bicyclo[3.2.1]octane-2,4-dione	C19H20F3NO5	C019H020F003N001O005	C019H020F003N001O005	19	20	20	0	0	0	3	0	1	0	5	0	0	399.361	48	22	6	0.214286	7	6	0	88.55	-1	2.7	2.7	2.69	2.58	2.07	1.22	0.57	0.36	0.36	0.36	0.36	0.36	0.36	-3.6
bifenox	Inhibitor of protoporphyrinogen oxidase	Y	Y	42576-02-3	png	svg	COC(=O)C1=C(C=CC(OC2=C(Cl)C=C(Cl)C=C2)=C1)[N+]([O-])=O	methyl 5-(2,4-dichlorophenoxy)-2-nitrobenzoate	C14H9Cl2NO5	C014H009Cl002N001O005	C014H009Cl002N001O005	14	9	9	0	0	2	0	0	1	0	5	0	0	342.131	31	10	12	0.545455	5	3	0	81.35	0	4.63	4.63	4.63	4.63	4.63	4.63	4.63	4.63	4.63	4.63	4.63	4.63	4.63	-5.85
bilanaphos	Inhibitor of glutamine synthetase		Y	35597-43-4	png	svg	C[C@H](NC(=O)[C@H](C)NC(=O)[C@@H](N)CCP(C)(O)=O)C(O)=O	(2S)-2-[(2S)-2-[(2S)-2-amino-4-[hydroxy(methyl)phosphoryl]butanamido]propanamido]propanoic acid	C11H22N3O6P	C011H022N003O006P001	C011H022N003O006P001	11	22	22	0	0	0	0	0	3	0	6	1	0	323.283	43	21	0	0	8	6	5	166.1	-1	-5.14	-4.63	-4.72	-5.4	-6.34	-7.3	-8.3	-8.59	-8.97	-9.08	-9.12	-9.27	-9.8	-2.04
bispyribac	Inhibitor of ALS		Y	125401-75-4	png	svg	COC1=CC(OC)=NC(OC2=CC=CC(OC3=NC(OC)=CC(OC)=N3)=C2C(O)=O)=N1	2,6-bis[(4,6-dimethoxypyrimidin-2-yl)oxy]benzoic acid	C19H18N4O8	C019H018N004O008	C019H018N004O008	19	18	18	0	0	0	0	0	4	0	8	0	0	430.368	49	13	18	0.580645	9	10	0	147.07	-1	3.87	3.78	3.3	2.42	1.46	0.36	0.36	0.36	0.36	0.36	0.36	0.36	0.36	-3.11
bromacil	Inhibitor of photosynthesis			314-40-9	png	svg	CCC(C)N1C(=O)NC(C)=C(Br)C1=O	5-bromo-3-(butan-2-yl)-6-methyl-1,2,3,4-tetrahydropyrimidine-2,4-dione	C9H13BrN2O2	C009H013Br001N002O002	C009H013Br001N002O002	9	13	13	0	1	0	0	0	2	0	2	0	0	261.116	27	8	6	0.428571	2	2	1	49.41	0	1.69	1.69	1.69	1.69	1.69	1.69	1.69	1.66	1.43	0.74	-0.09	-0.54	-0.63	-1.91
bromobutide	Unknown mode of action			74712-19-9	png	svg	CC(C)(C)C(Br)C(=O)NC(C)(C)C1=CC=CC=C1	2-bromo-3,3-dimethyl-N-(2-phenylpropan-2-yl)butanamide	C15H22BrNO	C015H022Br001N001O001	C015H022Br001N001O001	15	22	22	0	1	0	0	0	1	0	1	0	0	312.245	40	12	6	0.333333	4	1	1	29.1	0	4.17	4.17	4.17	4.17	4.17	4.17	4.17	4.17	4.17	4.16	4.07	3.69	3.32	-4.98
bromofenoxim	Unknown mode of action		Y	13181-17-4	png	svg	[O-][N+](=O)C1=CC(=C(ONC=C2C=C(Br)C(=O)C(Br)=C2)C=C1)[N+]([O-])=O	2,6-dibromo-4-{[(2,4-dinitrophenoxy)amino]methylidene}cyclohexa-2,5-dien-1-one	C13H7Br2N3O6	C013H007Br002N003O006	C013H007Br002N003O006	13	7	7	0	2	0	0	0	3	0	6	0	0	461.019	31	18	6	0.25	5	7	1	129.97	0	3.21	3.31	3.33	3.33	3.33	3.33	3.33	3.33	3.33	3.33	3.33	3.33	3.33	-5.34
bromoxynil	Inhibitor of photosynthesis		Y	1689-84-5	png	svg	OC1=C(Br)C=C(C=C1Br)C#N	3,5-dibromo-4-hydroxybenzonitrile	C7H3Br2NO	C007H003Br002N001O001	C007H003Br002N001O001	7	3	3	0	2	0	0	0	1	0	1	0	0	276.913	14	5	6	0.545455	0	2	0	46.85	-1	3.06	3.06	3.06	2.99	2.61	1.84	1.29	1.13	1.13	1.13	1.13	1.13	1.13		-3.33
butachlor	Inhibitor of cell division	Y		23184-66-9	png	svg	CCCCOCN(C(=O)CCl)C1=C(CC)C=CC=C1CC	N-(butoxymethyl)-2-chloro-N-(2,6-diethylphenyl)acetamide	C17H26ClNO2	C017H026Cl001N001O002	C017H026Cl001N001O002	17	26	26	0	0	1	0	0	1	0	2	0	0	311.847	47	15	6	0.285714	9	2	0	29.54	0	4.92	4.92	4.92	4.92	4.92	4.92	4.92	4.92	4.92	4.92	4.92	4.92	4.92		-4.19
butafenacil	Inhibitor of protoporphyrinogen oxidase			134605-64-4	png	svg	CN1C(=O)N(C(=O)C=C1C(F)(F)F)C1=CC(C(=O)OC(C)(C)C(=O)OCC=C)=C(Cl)C=C1	prop-2-en-1-yl 2-{2-chloro-5-[3-methyl-2,6-dioxo-4-(trifluoromethyl)-1,2,3,6-tetrahydropyrimidin-1-yl]benzoyloxy}-2-methylpropanoate	C20H18ClF3N2O6	C020H018Cl001F003N002O006	C020H018Cl001F003N002O006	20	18	18	0	0	1	3	0	2	0	6	0	0	474.815	50	20	12	0.375	9	4	0	93.22	0	4.01	4.01	4.01	4.01	4.01	4.01	4.01	4.01	4.01	4.01	4.01	4.01	4.01	-6.04
butamifos	Inhibitor of microtubule assembly	Y		36335-67-8	png	svg	CCOP(=S)(NC(C)CC)OC1=CC(C)=CC=C1[N+]([O-])=O	(butan-2-yl)[ethoxy(5-methyl-2-nitrophenoxy)sulfanylidene-λ⁵-phosphanyl]amine	C13H21N2O4PS	C013H021N002O004P001S001	C013H021N002O004P001S001	13	21	21	0	0	0	0	0	2	0	4	1	1	332.356	42	15	6	0.285714	8	2	1	76.31	0	3.96	4.04	4.05	4.05	4.05	4.05	4.05	4.01	3.79	3.3	3.06	3.03	3.03	-4.91
butenachlor	Inhibitor of cell division	Y		87310-56-3	png	svg	CCC1=CC=CC(CC)=C1N(COC\C=C/C)C(=O)CCl	N-{[(2Z)-but-2-en-1-yloxy]methyl}-2-chloro-N-(2,6-diethylphenyl)acetamide	C17H24ClNO2	C017H024Cl001N001O002	C017H024Cl001N001O002	17	24	24	0	0	1	0	0	1	0	2	0	0	309.831	45	15	6	0.285714	8	2	0	29.54	0	4.71	4.71	4.71	4.71	4.71	4.71	4.71	4.71	4.71	4.71	4.71	4.71	4.71	-4.33
butralin	Inhibitor of microtubule assembly	Y		33629-47-9	png	svg	CCC(C)NC1=C(C=C(C=C1[N+]([O-])=O)C(C)(C)C)[N+]([O-])=O	N-(butan-2-yl)-4-tert-butyl-2,6-dinitroaniline	C14H21N3O4	C014H021N003O004	C014H021N003O004	14	21	21	0	0	0	0	0	3	0	4	0	0	295.334	42	15	6	0.285714	6	5	1	103.67	0	4.82	4.82	4.82	4.82	4.82	4.82	4.82	4.82	4.8	4.69	4.19	3.41	2.96	-4.44
butroxydim	Inhibitor of ACCase		Y	138164-12-2	png	svg	CCCC(=O)C1=C(C)C(C2CC(=O)C(=C(CC)NOCC)C(=O)C2)=C(C)C=C1C	5-(3-butanoyl-2,4,6-trimethylphenyl)-2-[1-(ethoxyamino)propylidene]cyclohexane-1,3-dione	C24H33NO4	C024H033N001O004	C024H033N001O004	24	33	33	0	0	0	0	0	1	0	4	0	0	399.523	62	23	6	0.206897	8	5	1	72.47	0	5.12	5.19	5.19	5.2	5.2	5.2	5.2	5.2	5.2	5.2	5.2	5.2	5.2	-5
butylate	Inhibitor of lipid synthesis	Y		2008-41-5	png	svg	CCSC(=O)N(CC(C)C)CC(C)C	N,N-bis(2-methylpropyl)(ethylsulfanyl)formamide	C11H23NOS	C011H023N001O001S001	C011H023N001O001S001	11	23	23	0	0	0	0	0	1	0	1	0	1	217.371	37	14	0	0	6	1	0	20.31	0	3.53	3.53	3.53	3.53	3.53	3.53	3.53	3.53	3.53	3.53	3.53	3.53	3.53		-3.68
cafenstrole	Inhibitor of cell division	Y	Y	125306-83-4	png	svg	CCN(CC)C(=O)N1C=NC(=N1)S(=O)(=O)C1=C(C)C=C(C)C=C1C	N,N-diethyl-3-(2,4,6-trimethylbenzenesulfonyl)-1H-1,2,4-triazole-1-carboxamide	C16H22N4O3S	C016H022N004O003S001	C016H022N004O003S001	16	22	22	0	0	0	0	0	4	0	3	0	1	350.436	46	13	11	0.458333	4	5	0	85.16	0	2.91	2.91	2.91	2.91	2.91	2.91	2.91	2.91	2.91	2.91	2.91	2.91	2.91	-3.15
carbetamide	Inhibitor of microtubule organisation			16118-49-3	png	svg	CCNC(=O)[C@H](C)OC(=O)NC1=CC=CC=C1	(1S)-1-(ethylcarbamoyl)ethyl N-phenylcarbamate	C12H16N2O3	C012H016N002O003	C012H016N002O003	12	16	16	0	0	0	0	0	2	0	3	0	0	236.267	33	11	6	0.352941	5	3	2	67.43	0	1.65	1.65	1.65	1.65	1.65	1.65	1.65	1.65	1.65	1.65	1.63	1.48	0.93		-1.83
carfentrazone-ethyl	Inhibitor of protoporphyrinogen oxidase		Y	128639-02-1	png	svg	CCOC(=O)C(Cl)CC1=C(Cl)C=C(F)C(=C1)N1N=C(C)N(C(F)F)C1=O	ethyl 2-chloro-3-{2-chloro-5-[4-(difluoromethyl)-3-methyl-5-oxo-4,5-dihydro-1H-1,2,4-triazol-1-yl]-4-fluorophenyl}propanoate	C15H14Cl2F3N3O3	C015H014Cl002F003N003O003	C015H014Cl002F003N003O003	15	14	14	0	0	2	3	0	3	0	3	0	0	412.191	40	15	11	0.423077	7	3	0	62.21	0	4.29	4.29	4.29	4.29	4.29	4.29	4.29	4.29	4.29	4.29	4.29	4.29	4.29	-5.12
chlomethoxyfen	Inhibitor of protoporphyrinogen oxidase	Y		32861-85-1	png	svg	COC1=CC(OC2=CC=C(Cl)C=C2Cl)=CC=C1[N+]([O-])=O	4-(2,4-dichlorophenoxy)-2-methoxy-1-nitrobenzene	C13H9Cl2NO4	C013H009Cl002N001O004	C013H009Cl002N001O004	13	9	9	0	0	2	0	0	1	0	4	0	0	314.121	29	8	12	0.6	4	3	0	64.28	0	4.46	4.46	4.46	4.46	4.46	4.46	4.46	4.46	4.46	4.46	4.46	4.46	4.46	-5.55
chloramben	Synthetic auxin	Y		133-90-4	png	svg	NC1=CC(Cl)=CC(C(O)=O)=C1Cl	3-amino-2,5-dichlorobenzoic acid	C7H5Cl2NO2	C007H005Cl002N001O002	C007H005Cl002N001O002	7	5	5	0	0	2	0	0	1	0	2	0	0	206.026	17	6	6	0.5	1	3	2	66.15	-1	1.75	1.95	1.79	1.14	0.2	-0.73	-1.52	-1.52	-1.52	-1.52	-1.52	-1.52	-1.52		-2.47
chlorbromuron	Inhibitor of photosynthesis	Y	Y	13360-45-7	png	svg	CON(C)C(=O)NC1=CC(Cl)=C(Br)C=C1	1-(4-bromo-3-chlorophenyl)-3-methoxy-3-methylurea	C9H10BrClN2O2	C009H010Br001Cl001N002O002	C009H010Br001Cl001N002O002	9	10	10	0	1	1	0	0	2	0	2	0	0	293.545	25	9	6	0.4	2	2	1	41.57	0	2.85	2.85	2.85	2.85	2.85	2.85	2.85	2.85	2.85	2.84	2.73	2.28	1.74	-3.26
chlorflurenol	Unknown mode of action			2464-37-1	png	svg	OC(=O)C1(O)C2=CC(Cl)=CC=C2C2=C1C=CC=C2	2-chloro-9-hydroxy-9H-fluorene-9-carboxylic acid	C14H9ClO3	C014H009Cl001O003	C014H009Cl001O003	14	9	9	0	0	1	0	0	0	0	3	0	0	260.672	27	6	12	0.666667	1	3	1	60.36	-1	2.83	2.8	2.56	1.84	0.89	-0.02	-0.69	-0.69	-0.69	-0.7	-0.72	-0.9	-1.54		-4.18
chlorimuron-ethyl	Inhibitor of ALS		Y	90982-32-4	png	svg	CCOC(=O)C1=CC=CC=C1S(=O)(=O)NC(=O)NC1=NC(Cl)=CC(OC)=N1	ethyl 2-({[(4-chloro-6-methoxypyrimidin-2-yl)carbamoyl]amino}sulfonyl)benzoate	C15H15ClN4O6S	C015H015Cl001N004O006S001	C015H015Cl001N004O006S001	15	15	15	0	0	1	0	0	4	0	6	0	1	414.821	42	15	12	0.444444	6	8	1	133.78	-1	2.84	2.82	2.62	2.16	1.95	1.91	1.91	1.91	1.91	1.91	1.91	1.91	1.9	-4.52
chlorotoluron	Inhibitor of photosynthesis	Y	Y	15545-48-9	png	svg	CN(C)C(=O)NC1=CC(Cl)=C(C)C=C1	1-(3-chloro-4-methylphenyl)-3,3-dimethylurea	C10H13ClN2O	C010H013Cl001N002O001	C010H013Cl001N002O001	10	13	13	0	0	1	0	0	2	0	1	0	0	212.676	27	8	6	0.428571	1	1	1	32.34	0	2.44	2.44	2.44	2.44	2.44	2.44	2.44	2.44	2.44	2.44	2.44	2.41	2.22	-2.87
chloroxuron	Inhibitor of photosynthesis	Y	Y	1982-47-4	png	svg	CN(C)C(=O)NC1=CC=C(OC2=CC=C(Cl)C=C2)C=C1	1-[4-(4-chlorophenoxy)phenyl]-3,3-dimethylurea	C15H15ClN2O2	C015H015Cl001N002O002	C015H015Cl001N002O002	15	15	15	0	0	1	0	0	2	0	2	0	0	290.745	35	8	12	0.6	3	1	1	41.57	0	3.43	3.43	3.43	3.43	3.43	3.43	3.43	3.43	3.43	3.43	3.43	3.42	3.33		-4.89
chlorphthalim	Unknown mode of action			39985-63-2	png	svg	ClC1=CC=C(C=C1)N1C(=O)C2=C(CCCC2)C1=O	2-(4-chlorophenyl)-2,3,4,5,6,7-hexahydro-1H-isoindole-1,3-dione	C14H12ClNO2	C014H012Cl001N001O002	C014H012Cl001N001O002	14	12	12	0	0	1	0	0	1	0	2	0	0	261.704	30	12	6	0.333333	1	2	0	37.38	0	2.86	3.04	3.06	3.07	3.07	3.07	3.07	3.07	3.07	3.07	3.07	3.07	3.07	-3.34
chlorpropham	Inhibitor of microtubule organisation	Y		101-21-3	png	svg	CC(C)OC(=O)NC1=CC=CC(Cl)=C1	propan-2-yl N-(3-chlorophenyl)carbamate	C10H12ClNO2	C010H012Cl001N001O002	C010H012Cl001N001O002	10	12	12	0	0	1	0	0	1	0	2	0	0	213.661	26	8	6	0.428571	3	2	1	38.33	0	3.21	3.21	3.21	3.21	3.21	3.21	3.21	3.21	3.21	3.21	3.18	3	2.41		-3.38
chlorsulfuron	Inhibitor of ALS	Y	Y	64902-72-3	png	svg	COC1=NC(C)=NC(NC(=O)NS(=O)(=O)C2=C(Cl)C=CC=C2)=N1	1-(2-chlorobenzenesulfonyl)-3-(4-methoxy-6-methyl-1,3,5-triazin-2-yl)urea	C12H12ClN5O4S	C012H012Cl001N005O004S001	C012H012Cl001N005O004S001	12	12	12	0	0	1	0	0	5	0	4	0	1	357.773	35	11	12	0.521739	3	8	1	120.37	-1	2.59	2.59	2.38	1.88	1.61	1.56	1.56	1.56	1.56	1.56	1.56	1.56	1.55	-4.14
chlorthal-dimethyl	Inhibitor of microtubule assembly	Y		1861-32-1	png	svg	COC(=O)C1=C(Cl)C(Cl)=C(C(=O)OC)C(Cl)=C1Cl	1,4-dimethyl 2,3,5,6-tetrachlorobenzene-1,4-dicarboxylate	C10H6Cl4O4	C010H006Cl004O004	C010H006Cl004O004	10	6	6	0	0	4	0	0	0	0	4	0	0	331.964	24	12	6	0.333333	4	2	0	52.6	0	4.4	4.4	4.4	4.4	4.4	4.4	4.4	4.4	4.4	4.4	4.4	4.4	4.4	-5.6
chlorthiamid	Unknown mode of action			1918-13-4	png	svg	NC(=S)C1=C(Cl)C=CC=C1Cl	2,6-dichlorobenzene-1-carbothioamide	C7H5Cl2NS	C007H005Cl002N001S001	C007H005Cl002N001S001	7	5	5	0	0	2	0	0	1	0	0	0	1	206.092	16	5	6	0.545455	1	0	2	26.02	0	2.92	2.92	2.92	2.92	2.92	2.92	2.92	2.93	3.01	3.15	3.19	3.2	3.2	-4.11
cinidon-ethyl	Inhibitor of protoporphyrinogen oxidase	Y	Y	142891-20-1	png	svg	CCOC(=O)C(Cl)=CC1=C(Cl)C=CC(=C1)N1C(=O)C2=C(CCCC2)C1=O	ethyl 2-chloro-3-[2-chloro-5-(1,3-dioxo-2,3,4,5,6,7-hexahydro-1H-isoindol-2-yl)phenyl]prop-2-enoate	C19H17Cl2NO4	C019H017Cl002N001O004	C019H017Cl002N001O004	19	17	17	0	0	2	0	0	1	0	4	0	0	394.249	43	20	6	0.230769	5	3	0	63.68	0	4.15	4.33	4.35	4.35	4.35	4.35	4.35	4.35	4.35	4.35	4.35	4.35	4.35	-5.34
cinmethylin	Unknown mode of action			87818-31-3	png	svg	CC(C)C12CCC(C)(O1)C(C2)OCC1=CC=CC=C1C	1-methyl-2-[(2-methylphenyl)methoxy]-4-(propan-2-yl)-7-oxabicyclo[2.2.1]heptane	C18H26O2	C018H026O002	C018H026O002	18	26	26	0	0	0	0	0	0	0	2	0	0	274.398	46	14	6	0.3	4	2	0	18.46	0	4.24	4.24	4.24	4.24	4.24	4.24	4.24	4.24	4.24	4.24	4.24	4.24	4.24	-5.87
cinosulfuron	Inhibitor of ALS		Y	94593-91-6	png	svg	COCCOC1=CC=CC=C1S(=O)(=O)NC(=O)NC1=NC(OC)=NC(OC)=N1	1-(dimethoxy-1,3,5-triazin-2-yl)-3-[2-(2-methoxyethoxy)benzenesulfonyl]urea	C15H19N5O7S	C015H019N005O007S001	C015H019N005O007S001	15	19	19	0	0	0	0	0	5	0	7	0	1	413.406	47	16	12	0.428571	8	11	1	148.06	-1	1.87	1.84	1.63	1.18	0.97	0.94	0.93	0.93	0.93	0.93	0.93	0.93	0.92	-3.6
clethodim	Inhibitor of ACCase		Y	99129-21-2	png	svg	CCSC(C)CC1CC(=O)C(=C(CC)NOCC=CCl)C(=O)C1	2-(1-{[(3-chloroprop-2-en-1-yl)oxy]amino}propylidene)-5-[2-(ethylsulfanyl)propyl]cyclohexane-1,3-dione	C17H26ClNO3S	C017H026Cl001N001O003S001	C017H026Cl001N001O003S001	17	26	26	0	0	1	0	0	1	0	3	0	1	359.911	49	23	0	0	9	4	1	55.4	0	3.67	3.68	3.68	3.68	3.68	3.68	3.68	3.68	3.68	3.68	3.68	3.68	3.68	-4.48
clodinafop	Inhibitor of ACCase		Y	114420-56-3	png	svg	C[C@@H](OC1=CC=C(OC2=NC=C(Cl)C=C2F)C=C1)C(O)=O	(2R)-2-{4-[(5-chloro-3-fluoropyridin-2-yl)oxy]phenoxy}propanoic acid	C14H11ClFNO4	C014H011Cl001F001N001O004	C014H011Cl001F001N001O004	14	11	11	0	0	1	1	0	1	0	4	0	0	311.693	32	9	12	0.571429	5	4	0	71.48	-1	3.47	3.31	2.71	1.79	0.85	-0.04	-0.04	-0.04	-0.04	-0.04	-0.04	-0.04	-0.04	-3.92
clodinafop-propargyl	Inhibitor of ACCase		Y	105512-06-9	png	svg	C[C@@H](OC1=CC=C(OC2=NC=C(Cl)C=C2F)C=C1)C(=O)OCC#C	prop-2-yn-1-yl (2R)-2-{4-[(5-chloro-3-fluoropyridin-2-yl)oxy]phenoxy}propanoate	C17H13ClFNO4	C017H013Cl001F001N001O004	C017H013Cl001F001N001O004	17	13	13	0	0	1	1	0	1	0	4	0	0	349.741	37	12	12	0.5	7	3	0	57.65	0	3.86	3.86	3.86	3.86	3.86	3.86	3.86	3.86	3.86	3.86	3.86	3.86	3.86	-4.74
clomazone	Inhibitor of pigment synthesis	Y		81777-89-1	png	svg	CC1(C)CON(CC2=C(Cl)C=CC=C2)C1=O	2-[(2-chlorophenyl)methyl]-4,4-dimethyl-1,2-oxazolidin-3-one	C12H14ClNO2	C012H014Cl001N001O002	C012H014Cl001N001O002	12	14	14	0	0	1	0	0	1	0	2	0	0	239.698	30	10	6	0.375	2	2	0	29.54	0	2.93	2.93	2.93	2.93	2.93	2.93	2.93	2.93	2.93	2.93	2.93	2.93	2.93	-2.33
clomeprop	Synthetic auxin	Y	Y	84496-56-0	png	svg	CC(OC1=C(Cl)C(C)=C(Cl)C=C1)C(=O)NC1=CC=CC=C1	2-(2,4-dichloro-3-methylphenoxy)-N-phenylpropanamide	C16H15Cl2NO2	C016H015Cl002N001O002	C016H015Cl002N001O002	16	15	15	0	0	2	0	0	1	0	2	0	0	324.202	36	9	12	0.571429	4	2	1	38.33	0	5.02	5.02	5.02	5.02	5.02	5.02	5.02	5.02	5.02	5.02	5	4.87	4.36	-5.42
clopyralid	Synthetic auxin		Y	1702-17-6	png	svg	OC(=O)C1=C(Cl)C=CC(Cl)=N1	3,6-dichloropyridine-2-carboxylic acid	C6H3Cl2NO2	C006H003Cl002N001O002	C006H003Cl002N001O002	6	3	3	0	0	2	0	0	1	0	2	0	0	192	14	5	6	0.545455	1	3	0	53.02	-1	2.22	2.16	1.82	1	0.05	-1.3	-1.3	-1.3	-1.3	-1.3	-1.3	-1.3	-1.3	-1.64
cloransulam-methyl	Inhibitor of ALS	Y	Y	147150-35-4	png	svg	CCOC1=NC(F)=CC2=NC(=NN12)S(=O)(=O)NC1=C(C=CC=C1Cl)C(=O)OC	methyl 3-chloro-2-{5-ethoxy-7-fluoro-[1,2,4]triazolo[1,5-c]pyrimidine-2-sulfonamido}benzoate	C15H13ClFN5O5S	C015H013Cl001F001N005O005S001	C015H013Cl001F001N005O005S001	15	13	13	0	0	1	1	0	5	0	5	0	1	429.811	41	13	15	0.535714	6	8	0	121.98	-1	3.16	3.16	3.16	3.16	3.15	3.08	2.75	2.34	2.23	2.22	2.22	2.22	2.22	-4.27
cumyluron	Unknown mode of action	Y		99485-76-4	png	svg	CC(C)(NC(=O)NCC1=CC=CC=C1Cl)C1=CC=CC=C1	3-[(2-chlorophenyl)methyl]-1-(2-phenylpropan-2-yl)urea	C17H19ClN2O	C017H019Cl001N002O001	C017H019Cl001N002O001	17	19	19	0	0	1	0	0	2	0	1	0	0	302.799	40	9	12	0.571429	4	1	2	41.13	0	3.83	3.83	3.83	3.83	3.83	3.83	3.83	3.83	3.83	3.83	3.83	3.83	3.77	-5.11
cyanazine	Inhibitor of photosynthesis	Y	Y	21725-46-2	png	svg	CCNC1=NC(NC(C)(C)C#N)=NC(Cl)=N1	2-{[4-chloro-6-(ethylamino)-1,3,5-triazin-2-yl]amino}-2-methylpropanenitrile	C9H13ClN6	C009H013Cl001N006	C009H013Cl001N006	9	13	13	0	0	1	0	0	6	0	0	0	0	240.693	29	10	6	0.375	4	6	2	86.52	0	1.96	1.96	1.96	1.96	1.96	1.96	1.96	1.96	1.96	1.96	1.96	1.96	1.93		-3.15
cycloate	Inhibitor of lipid synthesis			1134-23-2	png	svg	CCSC(=O)N(CC)C1CCCCC1	N-cyclohexyl-N-ethyl(ethylsulfanyl)formamide	C11H21NOS	C011H021N001O001S001	C011H021N001O001S001	11	21	21	0	0	0	0	0	1	0	1	0	1	215.356	35	14	0	0	4	1	0	20.31	0	3.2	3.2	3.2	3.2	3.2	3.2	3.2	3.2	3.2	3.2	3.2	3.2	3.2		-3.4
cyclosulfamuron	Inhibitor of ALS			136849-15-5	png	svg	COC1=CC(OC)=NC(NC(=O)NS(=O)(=O)NC2=CC=CC=C2C(=O)C2CC2)=N1	1-[(2-cyclopropanecarbonylphenyl)sulfamoyl]-3-(4,6-dimethoxypyrimidin-2-yl)urea	C17H19N5O6S	C017H019N005O006S001	C017H019N005O006S001	17	19	19	0	0	0	0	0	5	0	6	0	1	421.428	48	17	12	0.413793	6	10	2	145.81	-1	1.29	1.63	1.45	1.01	0.84	0.81	0.81	0.81	0.81	0.81	0.8	0.72	0.36	-4.34
cycloxydim	Inhibitor of ACCase		Y	101205-02-1	png	svg	CCCC(NOCC)=C1C(=O)CC(CC1=O)C1CCCSC1	2-[1-(ethoxyamino)butylidene]-5-(thian-3-yl)cyclohexane-1,3-dione	C17H27NO3S	C017H027N001O003S001	C017H027N001O003S001	17	27	27	0	0	0	0	0	1	0	3	0	1	325.466	49	22	0	0	6	4	1	55.4	0	3.08	3.1	3.1	3.1	3.1	3.1	3.1	3.1	3.1	3.1	3.1	3.1	3.1	-3.67
cyhalofop-butyl	Inhibitor of ACCase		Y	122008-85-9	png	svg	CCCCOC(=O)[C@@H](C)OC1=CC=C(OC2=CC=C(C=C2F)C#N)C=C1	butyl (2R)-2-[4-(4-cyano-2-fluorophenoxy)phenoxy]propanoate	C20H20FNO4	C020H020F001N001O004	C020H020F001N001O004	20	20	20	0	0	0	1	0	1	0	4	0	0	357.375	46	14	12	0.461538	9	3	0	68.55	0	4.83	4.83	4.83	4.83	4.83	4.83	4.83	4.83	4.83	4.83	4.83	4.83	4.83	-5.01
dalapon	Inhibitor of lipid synthesis			75-99-0	png	svg	CC(Cl)(Cl)C(O)=O	2,2-dichloropropanoic acid	C3H4Cl2O2	C003H004Cl002O002	C003H004Cl002O002	3	4	4	0	0	2	0	0	0	0	2	0	0	142.969	11	7	0	0	1	2	0	40.13	-1	1.51	1.33	0.69	-0.24	-1.17	-1.99	-1.99	-1.99	-1.99	-1.99	-1.99	-1.99	-1.99	-1.56
dazomet	Unknown mode of action			533-74-4	png	svg	CN1CSC(=S)N(C)C1	3,5-dimethyl-1,3,5-thiadiazinane-2-thione	C5H10N2S2	C005H010N002S002	C005H010N002S002	5	10	10	0	0	0	0	0	2	0	0	0	2	162.276	19	9	0	0	0	1	0	6.48	0	-1.32	-0.38	0.54	1.12	1.26	1.28	1.28	1.28	1.28	1.28	1.28	1.28	1.28		-2.13
desmedipham	Inhibitor of photosynthesis		Y	13684-56-5	png	svg	CCOC(=O)NC1=CC=CC(OC(=O)NC2=CC=CC=C2)=C1	3-[(ethoxycarbonyl)amino]phenyl N-phenylcarbamate	C16H16N2O4	C016H016N002O004	C016H016N002O004	16	16	16	0	0	0	0	0	2	0	4	0	0	300.309	38	10	12	0.545455	6	4	2	76.66	0	3.7	3.7	3.7	3.7	3.7	3.7	3.7	3.7	3.7	3.7	3.65	3.27	2.09	-4.05
desmetryne	Inhibitor of photosynthesis		Y	1014-69-3	png	svg	CNC1=NC(SC)=NC(NC(C)C)=N1	2-N-methyl-6-(methylsulfanyl)-4-N-(propan-2-yl)-1,3,5-triazine-2,4-diamine	C8H15N5S	C008H015N005S001	C008H015N005S001	8	15	15	0	0	0	0	0	5	0	0	0	1	213.303	29	8	6	0.428571	4	5	2	62.73	0	0.27	0.28	0.42	0.95	1.73	2.15	2.23	2.24	2.24	2.24	2.24	2.24	2.22	-3.17
diallate	Unknown mode of action			2303-16-4	png	svg	CC(C)N(C(C)C)C(=O)SC\C(Cl)=C\Cl	N,N-bis(propan-2-yl){[(2Z)-2,3-dichloroprop-2-en-1-yl]sulfanyl}formamide	C10H17Cl2NOS	C010H017Cl002N001O001S001	C010H017Cl002N001O001S001	10	17	17	0	0	2	0	0	1	0	1	0	1	270.219	32	15	0	0	5	1	0	20.31	0	3.36	3.36	3.36	3.36	3.36	3.36	3.36	3.36	3.36	3.36	3.36	3.36	3.36	-4.03
dicamba	Synthetic auxin			1918-00-9	png	svg	COC1=C(Cl)C=CC(Cl)=C1C(O)=O	3,6-dichloro-2-methoxybenzoic acid	C8H6Cl2O3	C008H006Cl002O003	C008H006Cl002O003	8	6	6	0	0	2	0	0	0	0	3	0	0	221.037	19	7	6	0.461538	2	3	0	49.36	-1	2.65	2.45	1.77	0.83	-0.09	-0.85	-0.85	-0.85	-0.85	-0.85	-0.85	-0.85	-0.85		-1.7
dichlobenil	Inhibitor of cellulose synthesis			1194-65-6	png	svg	ClC1=CC=CC(Cl)=C1C#N	2,6-dichlorobenzonitrile	C7H3Cl2N	C007H003Cl002N001	C007H003Cl002N001	7	3	3	0	0	2	0	0	1	0	0	0	0	172.011	13	4	6	0.6	0	1	0	23.79	0	3.04	3.04	3.04	3.04	3.04	3.04	3.04	3.04	3.04	3.04	3.04	3.04	3.04		-4.24
dichlorprop	Synthetic auxin		Y	120-36-5	png	svg	CC(OC1=C(Cl)C=C(Cl)C=C1)C(O)=O	2-(2,4-dichlorophenoxy)propanoic acid	C9H8Cl2O3	C009H008Cl002O003	C009H008Cl002O003	9	8	8	0	0	2	0	0	0	0	3	0	0	235.064	22	8	6	0.428571	3	3	0	49.36	-1	3.06	2.96	2.49	1.61	0.65	-0.46	-0.46	-0.46	-0.46	-0.46	-0.46	-0.46	-0.46		-2.45
diclofop-methyl	Inhibitor of ACCase		Y	51338-27-3	png	svg	COC(=O)C(C)OC1=CC=C(OC2=C(Cl)C=C(Cl)C=C2)C=C1	methyl 2-[4-(2,4-dichlorophenoxy)phenoxy]propanoate	C16H14Cl2O4	C016H014Cl002O004	C016H014Cl002O004	16	14	14	0	0	2	0	0	0	0	4	0	0	341.186	36	10	12	0.545455	6	2	0	44.76	0	4.72	4.72	4.72	4.72	4.72	4.72	4.72	4.72	4.72	4.72	4.72	4.72	4.72		-5.63
diclosulam	Inhibitor of ALS	Y		145701-21-9	png	svg	CCOC1=NC(F)=CC2=NC(=NN12)S(=O)(=O)NC1=C(Cl)C=CC=C1Cl	N-(2,6-dichlorophenyl)-5-ethoxy-7-fluoro-[1,2,4]triazolo[1,5-c]pyrimidine-2-sulfonamide	C13H10Cl2FN5O3S	C013H010Cl002F001N005O003S001	C013H010Cl002F001N005O003S001	13	10	10	0	0	2	1	0	5	0	3	0	1	406.22	35	10	15	0.6	4	6	1	98.48	0	3.76	3.76	3.76	3.76	3.76	3.76	3.74	3.63	3.21	2.89	2.83	2.82	2.82	-4.3
diethatyl-ethyl	Inhibitor of cell division	Y		38727-55-8	png	svg	CCOC(=O)CN(C(=O)CCl)C1=C(CC)C=CC=C1CC	ethyl 2-[2-chloro-N-(2,6-diethylphenyl)acetamido]acetate	C16H22ClNO3	C016H022Cl001N001O003	C016H022Cl001N001O003	16	22	22	0	0	1	0	0	1	0	3	0	0	311.804	43	15	6	0.285714	8	2	0	46.61	0	3.51	3.51	3.51	3.51	3.51	3.51	3.51	3.51	3.51	3.51	3.51	3.51	3.51	-3.73
difenzoquat	Unknown mode of action		Y	43222-48-6	png	svg	COS([O-])(=O)=O.CN1C(=CC(C2=CC=CC=C2)=[N+]1C)C1=CC=CC=C1	1,2-dimethyl-3,5-diphenyl-1H-pyrazol-2-ium methyl sulfate	C18H20N2O4S	C018H020N002O004S001	C017H017N002	18	20	17	0	0	0	0	0	2	0	4	0	1	249.33	36	2	17	0.894737	2	0	0	8.81	1	0.26	0.26	0.26	0.26	0.26	0.26	0.26	0.26	0.26	0.26	0.26	0.26	0.26	-4.39
diflufenican	Inhibitor of pigment synthesis	Y	Y	83164-33-4	png	svg	FC1=CC=C(NC(=O)C2=C(OC3=CC(=CC=C3)C(F)(F)F)N=CC=C2)C(F)=C1	N-(2,4-difluorophenyl)-2-[3-(trifluoromethyl)phenoxy]pyridine-3-carboxamide	C19H11F5N2O2	C019H011F005N002O002	C019H011F005N002O002	19	11	11	0	0	0	5	0	2	0	2	0	0	394.295	39	10	18	0.642857	5	2	1	51.22	0	5.04	5.1	5.1	5.11	5.11	5.1	5.07	4.84	4.25	3.88	3.81	3.8	3.8	-5.11
diflufenzopyr	Inhibitor of auxin transport		Y	109293-97-2	png	svg	C\C(=N/NC(=O)NC1=CC(F)=CC(F)=C1)C1=NC=CC=C1C(O)=O	2-[(1E)-1-({[(3,5-difluorophenyl)carbamoyl]amino}imino)ethyl]pyridine-3-carboxylic acid	C15H12F2N4O3	C015H012F002N004O003	C015H012F002N004O003	15	12	12	0	0	0	2	0	4	0	3	0	0	334.278	36	12	12	0.5	4	5	2	106.51	-1	1.64	1.89	1.77	1.16	0.23	-0.71	-1.56	-1.56	-1.57	-1.64	-2	-2.44	-2.59	-4.37
dimefuron	Inhibitor of photosynthesis	Y	Y	34205-21-5	png	svg	CN(C)C(=O)NC1=CC=C(N2N=C(OC2=O)C(C)(C)C)C(Cl)=C1	1-[4-(5-tert-butyl-2-oxo-2,3-dihydro-1,3,4-oxadiazol-3-yl)-3-chlorophenyl]-3,3-dimethylurea	C15H19ClN4O3	C015H019Cl001N004O003	C015H019Cl001N004O003	15	19	19	0	0	1	0	0	4	0	3	0	0	338.789	42	12	11	0.478261	3	4	1	74.24	0	3.44	3.44	3.44	3.44	3.44	3.44	3.44	3.44	3.44	3.44	3.43	3.33	2.89	-3.42
dimepiperate	Inhibitor of lipid synthesis			61432-55-1	png	svg	CC(C)(SC(=O)N1CCCCC1)C1=CC=CC=C1	[(2-phenylpropan-2-yl)sulfanyl](piperidin-1-yl)methanone	C15H21NOS	C015H021N001O001S001	C015H021N001O001S001	15	21	21	0	0	0	0	0	1	0	1	0	1	263.398	39	12	6	0.333333	3	1	0	20.31	0	3.75	3.75	3.75	3.75	3.75	3.75	3.75	3.75	3.75	3.75	3.75	3.75	3.75	-4.42
dimethachlor	Inhibitor of cell division	Y		50563-36-5	png	svg	COCCN(C(=O)CCl)C1=C(C)C=CC=C1C	2-chloro-N-(2,6-dimethylphenyl)-N-(2-methoxyethyl)acetamide	C13H18ClNO2	C013H018Cl001N001O002	C013H018Cl001N001O002	13	18	18	0	0	1	0	0	1	0	2	0	0	255.741	35	11	6	0.352941	5	2	0	29.54	0	2.59	2.59	2.59	2.59	2.59	2.59	2.59	2.59	2.59	2.59	2.59	2.59	2.59	-2.6
dimethametryn	Inhibitor of photosynthesis			22936-75-0	png	svg	CCNC1=NC(SC)=NC(NC(C)C(C)C)=N1	2-N-ethyl-4-N-(3-methylbutan-2-yl)-6-(methylsulfanyl)-1,3,5-triazine-2,4-diamine	C11H21N5S	C011H021N005S001	C011H021N005S001	11	21	21	0	0	0	0	0	5	0	0	0	1	255.383	38	11	6	0.352941	6	5	2	62.73	0	1.52	1.52	1.67	2.22	2.99	3.4	3.47	3.48	3.48	3.48	3.48	3.48	3.45	-4.25
dimethenamid	Inhibitor of cell division		Y	87674-68-8	png	svg	COCC(C)N(C(=O)CCl)C1=C(C)SC=C1C	2-chloro-N-(2,4-dimethylthiophen-3-yl)-N-(1-methoxypropan-2-yl)acetamide	C12H18ClNO2S	C012H018Cl001N001O002S001	C012H018Cl001N001O002S001	12	18	18	0	0	1	0	0	1	0	2	0	1	275.795	35	12	5	0.294118	5	2	0	29.54	0	2.92	2.92	2.92	2.92	2.92	2.92	2.92	2.92	2.92	2.92	2.92	2.92	2.92	-3.47
dimethylarsinic acid	Unknown mode of action		Y	75-60-5	png	svg	C[As](C)(O)=O	dimethylarsinic acid	C2H7AsO2	C002H007As001O002	C002H007As001O002	2	7	7	1	0	0	0	0	0	0	2	0	1	137.997	12	5	0	0	0	2	0	40.13	-1	-0.33	-0.33	-0.33	-0.34	-0.39	-0.72	-1.5	-2.25	-2.59	-2.59	-2.59	-2.59	-2.59	0.27
dinitramine	Inhibitor of microtubule assembly			29091-05-2	png	svg	CCN(CC)C1=C(C(N)=C(C=C1[N+]([O-])=O)C(F)(F)F)[N+]([O-])=O	1-N,1-N-diethyl-2,6-dinitro-4-(trifluoromethyl)benzene-1,3-diamine	C11H13F3N4O4	C011H013F003N004O004	C011H013F003N004O004	11	13	13	0	0	0	3	0	4	0	4	0	0	322.24	35	16	6	0.272727	6	6	2	120.9	0	3.37	3.37	3.37	3.37	3.37	3.37	3.37	3.37	3.37	3.37	3.33	3.04	2.33		-5.47
dinoseb	Inhibitor of respiratory electron transport	Y	Y	88-85-7	png	svg	CCC(C)C1=C(O)C(=CC(=C1)[N+]([O-])=O)[N+]([O-])=O	2-(butan-2-yl)-4,6-dinitrophenol	C10H12N2O5	C010H012N002O005	C010H012N002O005	10	12	12	0	0	0	0	0	2	0	5	0	0	240.213	29	11	6	0.352941	4	5	0	114.7	-1	3.24	3.24	3.21	3.02	2.39	1.68	1.39	1.35	1.35	1.35	1.35	1.35	1.35		-3.38
dinoterb	Disruptor of cell membrane	Y	Y	1420-07-1	png	svg	CC(C)(C)C1=C(O)C(=CC(=C1)[N+]([O-])=O)[N+]([O-])=O	2-tert-butyl-4,6-dinitrophenol	C10H12N2O5	C010H012N002O005	C010H012N002O005	10	12	12	0	0	0	0	0	2	0	5	0	0	240.213	29	11	6	0.352941	3	5	0	114.7	-1	3.09	3.09	3.08	2.93	2.37	1.62	1.26	1.19	1.19	1.19	1.19	1.19	1.19	-3.39
diphenamid	Inhibitor of cell division	Y		957-51-7	png	svg	CN(C)C(=O)C(C1=CC=CC=C1)C1=CC=CC=C1	N,N-dimethyl-2,2-diphenylacetamide	C16H17NO	C016H017N001O001	C016H017N001O001	16	17	17	0	0	0	0	0	1	0	1	0	0	239.312	35	6	12	0.666667	3	1	0	20.31	0	2.93	2.93	2.93	2.93	2.93	2.93	2.93	2.93	2.93	2.93	2.93	2.93	2.93		-2.98
diquat	Unknown mode of action			85-00-7	png	svg	[Br-].[Br-].C1C[N+]2=C(C=CC=C2)C2=[N+]1C=CC=C2	7λ⁵,10λ⁵-diazatricyclo[8.4.0.0²,⁷]tetradeca-1(10),2(7),3,5,11,13-hexaene-7,10-bis(ylium) dibromide	C12H12Br2N2	C012H012Br002N002	C012H012N002	12	12	12	0	2	0	0	0	2	0	0	0	0	184.236	26	2	12	0.857143	0	0	0	7.76	2	-7.03	-7.03	-7.03	-7.03	-7.03	-7.03	-7.03	-7.03	-7.03	-7.03	-7.03	-7.03	-7.03	-6.07
dithiopyr	Inhibitor of microtubule assembly	Y	Y	97886-45-8	png	svg	CSC(=O)C1=C(N=C(C(C(=O)SC)=C1CC(C)C)C(F)(F)F)C(F)F	[6-(difluoromethyl)-4-(2-methylpropyl)-5-[(methylsulfanyl)carbonyl]-2-(trifluoromethyl)pyridin-3-yl](methylsulfanyl)methanone	C15H16F5NO2S2	C015H016F005N001O002S002	C015H016F005N001O002S002	15	16	16	0	0	0	5	0	1	0	2	0	2	401.415	41	19	6	0.24	8	3	0	47.03	0	5.77	5.77	5.77	5.77	5.77	5.77	5.77	5.77	5.77	5.77	5.77	5.77	5.77	-4.68
diuron	Inhibitor of photosynthesis			330-54-1	png	svg	CN(C)C(=O)NC1=CC(Cl)=C(Cl)C=C1	1-(3,4-dichlorophenyl)-3,3-dimethylurea	C9H10Cl2N2O	C009H010Cl002N002O001	C009H010Cl002N002O001	9	10	10	0	0	2	0	0	2	0	1	0	0	233.095	24	8	6	0.428571	1	1	1	32.34	0	2.53	2.53	2.53	2.53	2.53	2.53	2.53	2.53	2.53	2.53	2.53	2.47	2.14		-3.76
DNOC	Disruptor of cell membrane			534-52-1	png	svg	CC1=CC(=CC(=C1O)[N+]([O-])=O)[N+]([O-])=O	2-methyl-4,6-dinitrophenol	C7H6N2O5	C007H006N002O005	C007H006N002O005	7	6	6	0	0	0	0	0	2	0	5	0	0	198.133	20	8	6	0.428571	2	5	0	114.7	-1	2.06	2.06	2.03	1.79	1.11	0.44	0.22	0.18	0.18	0.18	0.18	0.18	0.18	-2.84
DSMA	Unknown mode of action			144-21-8	png	svg	[Na+].[Na+].C[As]([O-])([O-])=O	disodium methylarsonate	CH3AsNa2O3	C001H003As001Na002O003	C001H003As001O003	1	3	3	1	0	0	0	0	0	2	3	0	1	137.955	8	5	0	0	0	3	1	60.36	-1	-0.91	-0.92	-0.98	-1.32	-2.11	-2.85	-3.2	-3.39	-4.04	-4.87	-5.33	-5.44	-5.44	-0.08
dymron	Inhibitor of cell division	Y	Y	42609-52-9	png	svg	CC1=CC=C(NC(=O)NC(C)(C)C2=CC=CC=C2)C=C1	3-(4-methylphenyl)-1-(2-phenylpropan-2-yl)urea	C17H20N2O	C017H020N002O001	C017H020N002O001	17	20	20	0	0	0	0	0	2	0	1	0	0	268.353	40	8	12	0.6	3	1	2	41.13	0	4.04	4.04	4.04	4.04	4.04	4.04	4.04	4.04	4.04	4.04	4.03	4.02	3.92	-4.3
endothall	Unknown mode of action	Y	Y	145-73-3	png	svg	[Na+].[Na+].[O-]C(=O)C1C2CCC(O2)C1C([O-])=O	disodium 7-oxabicyclo[2.2.1]heptane-2,3-dicarboxylate	C8H8Na2O5	C008H008Na002O005	C008H008O005	8	8	8	0	0	0	0	0	0	2	5	0	0	184.147	21	13	0	0	2	5	0	89.49	-2	-0.19	-0.22	-0.44	-1.16	-2.31	-4.62	-5.57	-6.49	-7.25	-7.25	-7.25	-7.25	-7.25		-0.27
EPTC	Inhibitor of lipid synthesis			759-94-4	png	svg	CCCN(CCC)C(=O)SCC	N,N-dipropyl(ethylsulfanyl)formamide	C9H19NOS	C009H019N001O001S001	C009H019N001O001S001	9	19	19	0	0	0	0	0	1	0	1	0	1	189.318	31	12	0	0	6	1	0	20.31	0	2.8	2.8	2.8	2.8	2.8	2.8	2.8	2.8	2.8	2.8	2.8	2.8	2.8	-2.3
esprocarb	Inhibitor of lipid synthesis	Y	Y	85785-20-2	png	svg	CCN(C(C)C(C)C)C(=O)SCC1=CC=CC=C1	N-ethyl-N-(3-methylbutan-2-yl)(benzylsulfanyl)formamide	C15H23NOS	C015H023N001O001S001	C015H023N001O001S001	15	23	23	0	0	0	0	0	1	0	1	0	1	265.414	41	12	6	0.333333	6	1	0	20.31	0	4.43	4.43	4.43	4.43	4.43	4.43	4.43	4.43	4.43	4.43	4.43	4.43	4.43	-4.5
ethalfluralin	Inhibitor of microtubule assembly			55283-68-6	png	svg	CCN(CC(C)=C)C1=C(C=C(C=C1[N+]([O-])=O)C(F)(F)F)[N+]([O-])=O	N-ethyl-N-(2-methylprop-2-en-1-yl)-2,6-dinitro-4-(trifluoromethyl)aniline	C13H14F3N3O4	C013H014F003N003O004	C013H014F003N003O004	13	14	14	0	0	0	3	0	3	0	4	0	0	333.263	37	17	6	0.26087	7	5	0	94.88	0	4.17	4.17	4.17	4.17	4.17	4.17	4.17	4.17	4.17	4.17	4.17	4.17	4.17	-5.33
ethametsulfuron-methyl	Inhibitor of ALS		Y	97780-06-8	png	svg	CCOC1=NC(NC)=NC(NC(=O)NS(=O)(=O)C2=C(C=CC=C2)C(=O)OC)=N1	methyl 2-[({[4-ethoxy-6-(methylamino)-1,3,5-triazin-2-yl]carbamoyl}amino)sulfonyl]benzoate	C15H18N6O6S	C015H018N006O006S001	C015H018N006O006S001	15	18	18	0	0	0	0	0	6	0	6	0	1	410.405	46	16	12	0.428571	7	10	2	158.7	-1	1.72	1.99	1.83	1.38	1.16	1.13	1.13	1.13	1.13	1.13	1.13	1.13	1.11	-4.22
ethidimuron	Inhibitor of photosynthesis			30043-49-3	png	svg	CCS(=O)(=O)C1=NN=C(S1)N(C)C(=O)NC	1-[5-(ethanesulfonyl)-1,3,4-thiadiazol-2-yl]-1,3-dimethylurea	C7H12N4O3S2	C007H012N004O003S002	C007H012N004O003S002	7	12	12	0	0	0	0	0	4	0	3	0	2	264.325	28	11	5	0.3125	3	5	1	92.26	0	-0.54	-0.54	-0.54	-0.54	-0.54	-0.54	-0.54	-0.54	-0.54	-0.54	-0.54	-0.54	-0.54	-2.11
ethiolate	Unknown mode of action			2941-55-1	png	svg	CCSC(=O)N(CC)CC	N,N-diethyl(ethylsulfanyl)formamide	C7H15NOS	C007H015N001O001S001	C007H015N001O001S001	7	15	15	0	0	0	0	0	1	0	1	0	1	161.265	25	10	0	0	4	1	0	20.31	0	1.76	1.76	1.76	1.76	1.76	1.76	1.76	1.76	1.76	1.76	1.76	1.76	1.76	-1.13
ethofumesate	Inhibitor of lipid synthesis	Y	Y	26225-79-6	png	svg	CCOC1OC2=C(C=C(OS(C)(=O)=O)C=C2)C1(C)C	2-ethoxy-3,3-dimethyl-2,3-dihydro-1-benzofuran-5-yl methanesulfonate	C13H18O5S	C013H018O005S001	C013H018O005S001	13	18	18	0	0	0	0	0	0	0	5	0	1	286.344	37	13	6	0.315789	4	4	0	61.83	0	2.34	2.34	2.34	2.34	2.34	2.34	2.34	2.34	2.34	2.34	2.34	2.34	2.34	-3.09
ethoxyfen-ethyl	Inhibitor of protoporphyrinogen oxidase			131086-42-5	png	svg	CCOC(=O)C(C)OC(=O)C1=C(Cl)C=CC(OC2=C(Cl)C=C(C=C2)C(F)(F)F)=C1	ethyl 2-{2-chloro-5-[2-chloro-4-(trifluoromethyl)phenoxy]benzoyloxy}propanoate	C19H15Cl2F3O5	C019H015Cl002F003O005	C019H015Cl002F003O005	19	15	15	0	0	2	3	0	0	0	5	0	0	451.221	44	17	12	0.413793	9	2	0	61.83	0	6.11	6.11	6.11	6.11	6.11	6.11	6.11	6.11	6.11	6.11	6.11	6.11	6.11	-5.89
ethoxysulfuron	Inhibitor of ALS			126801-58-9	png	svg	CCOC1=CC=CC=C1OS(=O)(=O)NC(=O)NC1=NC(OC)=CC(OC)=N1	1-(4,6-dimethoxypyrimidin-2-yl)-3-[(2-ethoxyphenoxy)sulfonyl]urea	C15H18N4O7S	C015H018N004O007S001	C015H018N004O007S001	15	18	18	0	0	0	0	0	4	0	7	0	1	398.391	45	15	12	0.444444	7	10	1	135.17	-1	1.83	1.94	1.57	1.42	1.4	1.4	1.4	1.4	1.4	1.4	1.4	1.39	1.29	-3.4
etobenzanid	Unknown mode of action	Y	Y	79540-50-4	png	svg	CCOCOC1=CC=C(C=C1)C(=O)NC1=C(Cl)C(Cl)=CC=C1	N-(2,3-dichlorophenyl)-4-(ethoxymethoxy)benzamide	C16H15Cl2NO3	C016H015Cl002N001O003	C016H015Cl002N001O003	16	15	15	0	0	2	0	0	1	0	3	0	0	340.201	37	10	12	0.545455	6	3	1	47.56	0	4.54	4.54	4.54	4.54	4.54	4.54	4.54	4.53	4.49	4.24	3.65	3.3	3.23	-5.35
fenoxaprop	Inhibitor of ACCase		Y	95617-09-7	png	svg	CC(OC1=CC=C(OC2=NC3=CC=C(Cl)C=C3O2)C=C1)C(O)=O	2-{4-[(6-chloro-1,3-benzoxazol-2-yl)oxy]phenoxy}propanoic acid	C16H12ClNO5	C016H012Cl001N001O005	C016H012Cl001N001O005	16	12	12	0	0	1	0	0	1	0	5	0	0	333.723	35	8	15	0.652174	5	4	0	84.62	-1	3.99	3.95	3.64	2.87	1.91	0.47	0.47	0.47	0.47	0.47	0.47	0.47	0.47	-3.74
fenoxaprop P-ethyl	Inhibitor of ACCase		Y	71283-80-2	png	svg	CCOC(=O)[C@@H](C)OC1=CC=C(OC2=NC3=CC=C(Cl)C=C3O2)C=C1	ethyl (2R)-2-{4-[(6-chloro-1,3-benzoxazol-2-yl)oxy]phenoxy}propanoate	C18H16ClNO5	C018H016Cl001N001O005	C018H016Cl001N001O005	18	16	16	0	0	1	0	0	1	0	5	0	0	361.776	41	10	15	0.6	7	3	0	70.79	0	4.5	4.5	4.5	4.5	4.5	4.5	4.5	4.5	4.5	4.5	4.5	4.5	4.5	-4.12
fenoxasulfone	Unknown mode of action			639826-16-7	png	svg	CC1(C)CC(S(=O)(CC2=C(Cl)C=C(OCC)C(Cl)=C2)=O)=NO1	3-[(2,5-dichloro-4-ethoxyphenyl)methanesulfonyl]-5,5-dimethyl-4,5-dihydro-1,2-oxazole	C14H17Cl2NO4S	C014H017Cl002N001O004S001	C014H017Cl002N001O004S001	14	17	17	0	0	2	0	0	1	0	4	0	1	366.26	39	16	6	0.272727	5	5	0	64.96	0	3.23	3.23	3.23	3.23	3.23	3.23	3.23	3.23	3.23	3.23	3.23	3.23	3.23	-4.82
fentrazamide	Inhibitor of cell division	Y		158237-07-1	png	svg	CCN(C1CCCCC1)C(=O)N1N=NN(C1=O)C1=CC=CC=C1Cl	4-(2-chlorophenyl)-N-cyclohexyl-N-ethyl-5-oxo-4,5-dihydro-1H-1,2,3,4-tetrazole-1-carboxamide	C16H20ClN5O2	C016H020Cl001N005O002	C016H020Cl001N005O002	16	20	20	0	0	1	0	0	5	0	2	0	0	349.815	44	13	11	0.458333	3	4	0	68.58	0	4.88	4.88	4.88	4.88	4.88	4.88	4.88	4.88	4.88	4.88	4.88	4.88	4.88	-3.67
fenuron	Inhibitor of photosynthesis			101-42-8	png	svg	CN(C)C(=O)NC1=CC=CC=C1	3,3-dimethyl-1-phenylurea	C9H12N2O	C009H012N002O001	C009H012N002O001	9	12	12	0	0	0	0	0	2	0	1	0	0	164.204	24	6	6	0.5	1	1	1	32.34	0	1.32	1.32	1.32	1.32	1.32	1.32	1.32	1.32	1.32	1.32	1.32	1.29	1.08		-1.6
flamprop M-​isopropyl	Unknown mode of action		Y	63782-90-1	png	svg	CC(C)OC(=O)[C@@H](C)N(C(=O)C1=CC=CC=C1)C1=CC=C(F)C(Cl)=C1	propan-2-yl (2R)-2-[N-(3-chloro-4-fluorophenyl)-1-phenylformamido]propanoate	C19H19ClFNO3	C019H019Cl001F001N001O003	C019H019Cl001F001N001O003	19	19	19	0	0	1	1	0	1	0	3	0	0	363.81	44	13	12	0.48	6	2	0	46.61	0	4.64	4.64	4.64	4.64	4.64	4.64	4.64	4.64	4.64	4.64	4.64	4.64	4.64	-5.09
flamprop-methyl	Unknown mode of action		Y	52756-25-9	png	svg	COC(=O)C(C)N(C(=O)C1=CC=CC=C1)C1=CC=C(F)C(Cl)=C1	methyl 2-[N-(3-chloro-4-fluorophenyl)-1-phenylformamido]propanoate	C17H15ClFNO3	C017H015Cl001F001N001O003	C017H015Cl001F001N001O003	17	15	15	0	0	1	1	0	1	0	3	0	0	335.757	38	11	12	0.521739	5	2	0	46.61	0	3.87	3.87	3.87	3.87	3.87	3.87	3.87	3.87	3.87	3.87	3.87	3.87	3.87	-4.82
flazasulfuron	Inhibitor of ALS	Y	Y	104040-78-0	png	svg	COC1=CC(OC)=NC(NC(=O)NS(=O)(=O)C2=NC=CC=C2C(F)(F)F)=N1	3-(4,6-dimethoxypyrimidin-2-yl)-1-{[3-(trifluoromethyl)pyridin-2-yl]sulfonyl}urea	C13H12F3N5O5S	C013H012F003N005O005S001	C013H012F003N005O005S001	13	12	12	0	0	0	3	0	5	0	5	0	1	407.325	39	15	12	0.444444	5	9	1	129.6	-1	1.9	2.28	2.34	2.27	1.91	1.52	1.43	1.42	1.42	1.42	1.42	1.42	1.41	-3.74
florasulam	Inhibitor of ALS		Y	145701-23-1	png	svg	COC1=NC=C(F)C2=NC(=NN12)S(=O)(=O)NC1=C(F)C=CC=C1F	N-(2,6-difluorophenyl)-8-fluoro-5-methoxy-[1,2,4]triazolo[1,5-c]pyrimidine-2-sulfonamide	C12H8F3N5O3S	C012H008F003N005O003S001	C012H008F003N005O003S001	12	8	8	0	0	0	3	0	5	0	3	0	1	359.284	32	9	15	0.625	3	6	1	98.48	0	2.09	2.09	2.09	2.09	2.09	2.09	2.07	1.96	1.55	1.22	1.15	1.14	1.14	-3.76
fluazifop	Inhibitor of ACCase		Y	69335-91-7	png	svg	CC(OC1=CC=C(OC2=CC=C(C=N2)C(F)(F)F)C=C1)C(O)=O	2-(4-{[5-(trifluoromethyl)pyridin-2-yl]oxy}phenoxy)propanoic acid	C15H12F3NO4	C015H012F003N001O004	C015H012F003N001O004	15	12	12	0	0	0	3	0	1	0	4	0	0	327.255	35	11	12	0.521739	6	4	0	71.48	-1	3.51	3.48	2.98	2.09	1.13	0.09	0.09	0.09	0.09	0.09	0.09	0.09	0.09	-4.09
fluazifop-butyl	Inhibitor of ACCase		Y	69806-50-4	png	svg	CCCCOC(=O)C(C)OC1=CC=C(OC2=CC=C(C=N2)C(F)(F)F)C=C1	butyl 2-(4-{[5-(trifluoromethyl)pyridin-2-yl]oxy}phenoxy)propanoate	C19H20F3NO4	C019H020F003N001O004	C019H020F003N001O004	19	20	20	0	0	0	3	0	1	0	4	0	0	383.362	47	15	12	0.444444	10	3	0	57.65	0	4.99	5.08	5.09	5.09	5.09	5.09	5.09	5.09	5.09	5.09	5.09	5.09	5.09	-5.09
fluazolate	Inhibitor of protoporphyrinogen oxidase	Y		174514-07-9	png	svg	CC(C)OC(=O)C1=C(Cl)C=C(F)C(=C1)C1=NN(C)C(=C1Br)C(F)(F)F	propan-2-yl 5-[4-bromo-1-methyl-5-(trifluoromethyl)-1H-pyrazol-3-yl]-2-chloro-4-fluorobenzoate	C15H12BrClF4N2O2	C015H012Br001Cl001F004N002O002	C015H012Br001Cl001F004N002O002	15	12	12	0	1	1	4	0	2	0	2	0	0	443.619	37	14	11	0.44	5	2	0	44.12	0	5.48	5.52	5.52	5.52	5.52	5.52	5.52	5.52	5.52	5.52	5.52	5.52	5.52	-5.29
flucarbazone-sodium	Inhibitor of ALS		Y	181274-17-9	png	svg	[Na+].COC1=NN(C(=O)[N-]S(=O)(=O)C2=C(OC(F)(F)F)C=CC=C2)C(=O)N1C	sodium (3-methoxy-4-methyl-5-oxo-4,5-dihydro-1H-1,2,4-triazole-1-carbonyl)[2-(trifluoromethoxy)benzenesulfonyl]azanide	C12H10F3N4NaO6S	C012H010F003N004Na001O006S001	C012H010F003N004O006S001	12	10	10	0	0	0	3	0	4	1	6	0	1	395.292	36	15	11	0.423077	4	8	0	114.81	-1	2.57	2.53	2.3	1.85	1.66	1.63	1.63	1.63	1.63	1.63	1.63	1.63	1.63	-4.1
flucetosulfuron	Inhibitor of ALS			412928-75-7	png	svg	COCC(=O)OC(C(C)F)C1=NC=CC=C1S(=O)(=O)NC(=O)NC1=NC(OC)=CC(OC)=N1	1-[3-({[(4,6-dimethoxypyrimidin-2-yl)carbamoyl]amino}sulfonyl)pyridin-2-yl]-2-fluoropropyl 2-methoxyacetate	C18H22FN5O8S	C018H022F001N005O008S001	C018H022F001N005O008S001	18	22	22	0	0	0	1	0	5	0	8	0	1	487.459	55	21	12	0.363636	10	11	1	165.13	-1	0.83	1.22	1.28	1.24	0.96	0.52	0.38	0.35	0.35	0.35	0.35	0.35	0.35	-3.73
fluchloralin	Inhibitor of cell division			33245-39-5	png	svg	CCCN(CCCl)C1=C(C=C(C=C1[N+]([O-])=O)C(F)(F)F)[N+]([O-])=O	N-(2-chloroethyl)-2,6-dinitro-N-propyl-4-(trifluoromethyl)aniline	C12H13ClF3N3O4	C012H013Cl001F003N003O004	C012H013Cl001F003N003O004	12	13	13	0	0	1	3	0	3	0	4	0	0	355.698	36	17	6	0.26087	8	5	0	94.88	0	4.38	4.38	4.38	4.38	4.38	4.38	4.38	4.38	4.38	4.38	4.38	4.38	4.38	-5.91
flufenacet	Inhibitor of cell division	Y	Y	142459-58-3	png	svg	CC(C)N(C(=O)COC1=NN=C(S1)C(F)(F)F)C1=CC=C(F)C=C1	N-(4-fluorophenyl)-N-(propan-2-yl)-2-{[5-(trifluoromethyl)-1,3,4-thiadiazol-2-yl]oxy}acetamide	C14H13F4N3O2S	C014H013F004N003O002S001	C014H013F004N003O002S001	14	13	13	0	0	0	4	0	3	0	2	0	1	363.331	37	13	11	0.458333	6	4	0	55.32	0	3.22	3.22	3.22	3.22	3.22	3.22	3.22	3.22	3.22	3.22	3.19	3	2.34	-4.42
flufenpyr-ethyl	Inhibitor of protoporphyrinogen oxidase			188489-07-8	png	svg	CCOC(=O)COC1=CC(N2N=CC(=C(C)C2=O)C(F)(F)F)=C(F)C=C1Cl	ethyl 2-{2-chloro-4-fluoro-5-[5-methyl-6-oxo-4-(trifluoromethyl)-1,6-dihydropyridazin-1-yl]phenoxy}acetate	C16H13ClF4N2O4	C016H013Cl001F004N002O004	C016H013Cl001F004N002O004	16	13	13	0	0	1	4	0	2	0	4	0	0	408.732	40	15	12	0.444444	7	4	0	68.2	0	3.05	3.05	3.05	3.05	3.05	3.05	3.05	3.05	3.05	3.05	3.05	3.05	3.05	-5.51
flumetsulam	Inhibitor of ALS			98967-40-9	png	svg	CC1=NC2=NC(=NN2C=C1)S(=O)(=O)NC1=C(F)C=CC=C1F	N-(2,6-difluorophenyl)-5-methyl-[1,2,4]triazolo[1,5-a]pyrimidine-2-sulfonamide	C12H9F2N5O2S	C012H009F002N005O002S001	C012H009F002N005O002S001	12	9	9	0	0	0	2	0	5	0	2	0	1	325.294	31	7	15	0.681818	2	5	1	89.25	0	1.8	1.8	1.8	1.8	1.8	1.79	1.78	1.67	1.26	0.93	0.86	0.85	0.85	-3.65
flumiclorac-pentyl	Inhibitor of protoporphyrinogen oxidase	Y	Y	87546-18-7	png	svg	CCCCCOC(=O)COC1=C(Cl)C=C(F)C(=C1)N1C(=O)C2=C(CCCC2)C1=O	pentyl 2-[2-chloro-5-(1,3-dioxo-2,3,4,5,6,7-hexahydro-1H-isoindol-2-yl)-4-fluorophenoxy]acetate	C21H23ClFNO5	C021H023Cl001F001N001O005	C021H023Cl001F001N001O005	21	23	23	0	0	1	1	0	1	0	5	0	0	423.862	52	23	6	0.206897	9	4	0	72.91	0	4.3	4.43	4.44	4.44	4.44	4.44	4.44	4.44	4.44	4.44	4.44	4.44	4.44	-5.1
flumioxazin	Inhibitor of protoporphyrinogen oxidase	Y		103361-09-7	png	svg	FC1=CC2=C(C=C1N1C(=O)C3=C(CCCC3)C1=O)N(CC#C)C(=O)CO2	2-[7-fluoro-3-oxo-4-(prop-2-yn-1-yl)-3,4-dihydro-2H-1,4-benzoxazin-6-yl]-2,3,4,5,6,7-hexahydro-1H-isoindole-1,3-dione	C19H15FN2O4	C019H015F001N002O004	C019H015F001N002O004	19	15	15	0	0	0	1	0	2	0	4	0	0	354.332	41	20	6	0.230769	2	4	0	66.92	0	1.32	1.46	1.48	1.48	1.48	1.48	1.48	1.48	1.48	1.48	1.48	1.48	1.48	-3.95
fluometuron	Inhibitor of photosynthesis			2164-17-2	png	svg	CN(C)C(=O)NC1=CC(=CC=C1)C(F)(F)F	3,3-dimethyl-1-[3-(trifluoromethyl)phenyl]urea	C10H11F3N2O	C010H011F003N002O001	C010H011F003N002O001	10	11	11	0	0	0	3	0	2	0	1	0	0	232.202	27	10	6	0.375	2	1	1	32.34	0	2.2	2.2	2.2	2.2	2.2	2.2	2.2	2.2	2.2	2.2	2.2	2.14	1.83		-3.43
fluoroglycofen-ethyl	Inhibitor of protoporphyrinogen oxidase		Y	77501-90-7	png	svg	CCOC(=O)COC(=O)C1=C(C=CC(OC2=C(Cl)C=C(C=C2)C(F)(F)F)=C1)[N+]([O-])=O	ethyl 2-{5-[2-chloro-4-(trifluoromethyl)phenoxy]-2-nitrobenzoyloxy}acetate	C18H13ClF3NO7	C018H013Cl001F003N001O007	C018H013Cl001F003N001O007	18	13	13	0	0	1	3	0	1	0	7	0	0	447.747	43	18	12	0.4	10	4	0	107.65	0	4.88	4.88	4.88	4.88	4.88	4.88	4.88	4.88	4.88	4.88	4.88	4.88	4.88	-5.94
flupoxam	Inhibitor of cellulose synthesis	Y	Y	119126-15-7	png	svg	NC(=O)C1=NN(C(=N1)C1=CC=CC=C1)C1=CC=C(Cl)C(COCC(F)(F)C(F)(F)F)=C1	1-{4-chloro-3-[(2,2,3,3,3-pentafluoropropoxy)methyl]phenyl}-5-phenyl-1H-1,2,4-triazole-3-carboxamide	C19H14ClF5N4O2	C019H014Cl001F005N004O002	C019H014Cl001F005N004O002	19	14	14	0	0	1	5	0	4	0	2	0	0	460.785	45	14	17	0.548387	8	4	2	83.03	0	4.94	4.94	4.94	4.94	4.94	4.94	4.94	4.94	4.94	4.94	4.91	4.75	4.54	-5.5
flupropacil	Inhibitor of protoporphyrinogen oxidase			120890-70-2	png	svg	CC(C)OC(=O)C1=CC(=CC=C1Cl)N1C(=O)C=C(N(C)C1=O)C(F)(F)F	propan-2-yl 2-chloro-5-[3-methyl-2,6-dioxo-4-(trifluoromethyl)-1,2,3,6-tetrahydropyrimidin-1-yl]benzoate	C16H14ClF3N2O4	C016H014Cl001F003N002O004	C016H014Cl001F003N002O004	16	14	14	0	0	1	3	0	2	0	4	0	0	390.742	40	14	12	0.461538	5	3	0	66.92	0	3.42	3.43	3.43	3.43	3.43	3.43	3.43	3.43	3.43	3.43	3.43	3.43	3.43	-5.85
flupropanate	Unknown mode of action			756-09-2	png	svg	[O-]C(=O)C(F)(F)C(F)F	2,2,3,3-tetrafluoropropanoate	C3HF4O2	C003H001F004O002	C003H001F004O002	3	1	1	0	0	0	4	0	0	0	2	0	0	145.033	10	9	0	0	2	2	0	40.13	-1	0.97	0.42	-0.49	-1.44	-2.41	-2.41	-2.41	-2.41	-2.41	-2.41	-2.41	-2.41	-2.41	-1.64
flupyrsulfuron-methyl	Inhibitor of ALS		Y	144740-53-4	png	svg	COC(=O)C1=CC=C(N=C1S(=O)(=O)NC(=O)NC1=NC(OC)=CC(OC)=N1)C(F)(F)F	methyl 2-({[(4,6-dimethoxypyrimidin-2-yl)carbamoyl]amino}sulfonyl)-6-(trifluoromethyl)pyridine-3-carboxylate	C15H14F3N5O7S	C015H014F003N005O007S001	C015H014F003N005O007S001	15	14	14	0	0	0	3	0	5	0	7	0	1	465.361	45	19	12	0.387097	7	10	1	155.9	-1	2.29	2.67	2.73	2.66	2.3	1.91	1.82	1.81	1.81	1.81	1.81	1.8	1.8	-4.18
fluridone	Inhibitor of pigment synthesis			59756-60-4	png	svg	CN1C=C(C(=O)C(=C1)C1=CC(=CC=C1)C(F)(F)F)C1=CC=CC=C1	1-methyl-3-phenyl-5-[3-(trifluoromethyl)phenyl]-1,4-dihydropyridin-4-one	C19H14F3NO	C019H014F003N001O001	C019H014F003N001O001	19	14	14	0	0	0	3	0	1	0	1	0	0	329.316	38	6	18	0.75	3	2	0	20.31	0	4.87	4.87	4.87	4.87	4.87	4.87	4.87	4.87	4.87	4.87	4.87	4.87	4.87		-4.44
flurochloridone	Inhibitor of pigment synthesis	Y		61213-25-0	png	svg	FC(F)(F)C1=CC(=CC=C1)N1CC(CCl)C(Cl)C1=O	3-chloro-4-(chloromethyl)-1-[3-(trifluoromethyl)phenyl]pyrrolidin-2-one	C12H10Cl2F3NO	C012H010Cl002F003N001O001	C012H010Cl002F003N001O001	12	10	10	0	0	2	3	0	1	0	1	0	0	312.115	29	13	6	0.315789	3	1	0	20.31	0	3.25	3.25	3.25	3.25	3.25	3.25	3.25	3.25	3.25	3.25	3.25	3.25	3.25	-4.04
fluroxypyr	Synthetic auxin		Y	69377-81-7	png	svg	NC1=C(Cl)C(OCC(O)=O)=NC(F)=C1Cl	2-[(4-amino-3,5-dichloro-6-fluoropyridin-2-yl)oxy]acetic acid	C7H5Cl2FN2O3	C007H005Cl002F001N002O003	C007H005Cl002F001N002O003	7	5	5	0	0	2	1	0	2	0	3	0	0	255.031	20	9	6	0.4	3	5	2	88.27	-1	1.55	1.29	0.56	-0.39	-1.29	-1.94	-1.94	-1.94	-1.94	-1.94	-1.94	-1.94	-1.94	-2.47
flurtamone	Inhibitor of pigment synthesis	Y	Y	96525-23-4	png	svg	CNC1=C(C(=O)C(O1)C1=CC=CC=C1)C1=CC(=CC=C1)C(F)(F)F	5-(methylamino)-2-phenyl-4-[3-(trifluoromethyl)phenyl]-2,3-dihydrofuran-3-one	C18H14F3NO2	C018H014F003N001O002	C018H014F003N001O002	18	14	14	0	0	0	3	0	1	0	2	0	0	333.305	38	12	12	0.5	4	3	1	38.33	0	4.64	4.64	4.64	4.64	4.64	4.64	4.64	4.64	4.64	4.64	4.64	4.64	4.57	-4.76
fluthiacet-methyl	Inhibitor of protoporphyrinogen oxidase		Y	117337-19-6	png	svg	COC(=O)CSC1=C(Cl)C=C(F)C(=C1)N=C1SC(=O)N2CCCCN12	methyl 2-{[2-chloro-4-fluoro-5-({3-oxo-hexahydro-[1,3,4]thiadiazolo[3,4-a]pyridazin-1-ylidene}amino)phenyl]sulfanyl}acetate	C15H15ClFN3O3S2	C015H015Cl001F001N003O003S002	C015H015Cl001F001N003O003S002	15	15	15	0	0	1	1	0	3	0	3	0	2	403.879	40	14	11	0.44	5	4	0	62.21	0	3.43	3.5	3.51	3.51	3.51	3.51	3.51	3.51	3.51	3.51	3.51	3.51	3.51	-4.15
fomesafen	Inhibitor of protoporphyrinogen oxidase		Y	72178-02-0	png	svg	[Na+].CS(=O)(=O)[N-]C(=O)C1=C(C=CC(OC2=C(Cl)C=C(C=C2)C(F)(F)F)=C1)[N+]([O-])=O	sodium {5-[2-chloro-4-(trifluoromethyl)phenoxy]-2-nitrobenzoyl}(methanesulfonyl)azanide	C15H9ClF3N2NaO6S	C015H009Cl001F003N002Na001O006S001	C015H009Cl001F003N002O006S001	15	9	9	0	0	1	3	0	2	1	6	0	1	437.756	37	16	12	0.428571	5	6	0	115.49	-1	3.23	3.22	3.14	2.79	2.4	2.3	2.29	2.29	2.29	2.29	2.29	2.29	2.29	-5.91
foramsulfuron	Inhibitor of ALS		Y	173159-57-4	png	svg	COC1=CC(OC)=NC(NC(=O)NS(=O)(=O)C2=C(C=CC=C2NC=O)C(=O)N(C)C)=N1	2-({[(4,6-dimethoxypyrimidin-2-yl)carbamoyl]amino}sulfonyl)-3-formamido-N,N-dimethylbenzamide	C17H20N6O7S	C017H020N006O007S001	C017H020N006O007S001	17	20	20	0	0	0	0	0	6	0	7	0	1	452.442	51	19	12	0.387097	6	10	2	166.12	-1	0.13	0.48	0.33	-0.11	-0.32	-0.35	-0.35	-0.35	-0.35	-0.35	-0.38	-0.54	-1.08	-4.4
fosamine	Unknown mode of action			59682-52-9	png	svg	[NH4+].CCOP([O-])(=O)C(N)=O	ammonium ethyl carbamoylphosphonate	C3H11N2O4P	C003H011N002O004P001	C003H007N001O004P001	3	11	7	0	0	0	0	0	2	0	4	1	0	152.066	16	9	0	0	3	3	2	92.45	-1	-1.11	-1.88	-2.65	-3.03	-3.03	-3.03	-3.03	-3.03	-3.03	-3.03	-3.03	-3.03	-3.04	-0.63
glufosinate	Inhibitor of glutamine synthetase	Y	Y	51276-47-2	png	svg	[NH4+].CP(O)(=O)CCC(N)C([O-])=O	ammonium 2-amino-4-[hydroxy(methyl)phosphoryl]butanoate	C5H15N2O4P	C005H015N002O004P001	C005H011N001O004P001	5	15	11	0	0	0	0	0	2	0	4	1	0	180.119	22	11	0	0	4	4	3	107.9	-1	-4.09	-3.75	-4.26	-5.18	-6.13	-7.16	-7.16	-7.19	-7.36	-7.78	-7.98	-8.01	-8.02	-0.59
glyphosate	Inhibitor of EPSP synthase			1071-83-6	png	svg	OC(=O)CNCP(O)(O)=O	2-[(phosphonomethyl)amino]acetic acid	C3H8NO5P	C003H008N001O005P001	C003H008N001O005P001	3	8	8	0	0	0	0	0	1	0	5	1	0	169.073	18	10	0	0	4	5	3	117.1	-1	-3.1	-3.19	-3.67	-4.55	-5.5	-6.55	-7.6	-8.09	-8.86	-9.62	-10.01	-10.01	-10.01	-1
halosafen	Inhibitor of protoporphyrinogen oxidase			77227-69-1	png	svg	CCS(=O)(=O)NC(=O)C1=CC(OC2=C(F)C=C(C=C2Cl)C(F)(F)F)=CC=C1[N+]([O-])=O	5-[2-chloro-6-fluoro-4-(trifluoromethyl)phenoxy]-N-(ethanesulfonyl)-2-nitrobenzamide	C16H11ClF4N2O6S	C016H011Cl001F004N002O006S001	C016H011Cl001F004N002O006S001	16	11	11	0	0	1	4	0	2	0	6	0	1	470.78	41	18	12	0.4	6	6	0	115.49	-1	3.88	3.87	3.79	3.43	3.04	2.95	2.94	2.94	2.94	2.94	2.94	2.94	2.94	-5.73
halosulfuron-methyl	Inhibitor of ALS		Y	100784-20-1	png	svg	COC(=O)C1=C(N(C)N=C1Cl)S(=O)(=O)NC(=O)NC1=NC(OC)=CC(OC)=N1	methyl 3-chloro-5-({[(4,6-dimethoxypyrimidin-2-yl)carbamoyl]amino}sulfonyl)-1-methyl-1H-pyrazole-4-carboxylate	C13H15ClN6O7S	C013H015Cl001N006O007S001	C013H015Cl001N006O007S001	13	15	15	0	0	1	0	0	6	0	7	0	1	434.812	43	17	11	0.392857	6	10	1	160.83	-1	0.99	1.37	1.43	1.37	1.03	0.63	0.52	0.51	0.51	0.51	0.51	0.51	0.5	-3.3
haloxyfop-methyl	Inhibitor of ACCase		Y	69806-40-2	png	svg	COC(=O)C(C)OC1=CC=C(OC2=C(Cl)C=C(C=N2)C(F)(F)F)C=C1	methyl 2-(4-{[3-chloro-5-(trifluoromethyl)pyridin-2-yl]oxy}phenoxy)propanoate	C16H13ClF3NO4	C016H013Cl001F003N001O004	C016H013Cl001F003N001O004	16	13	13	0	0	1	3	0	1	0	4	0	0	375.727	38	13	12	0.48	7	3	0	57.65	0	4.36	4.37	4.37	4.37	4.37	4.37	4.37	4.37	4.37	4.37	4.37	4.37	4.37	-4.72
hexazinone	Inhibitor of photosynthesis		Y	51235-04-2	png	svg	CN(C)C1=NC(=O)N(C2CCCCC2)C(=O)N1C	3-cyclohexyl-6-(dimethylamino)-1-methyl-1,2,3,4-tetrahydro-1,3,5-triazine-2,4-dione	C12H20N4O2	C012H020N004O002	C012H020N004O002	12	20	20	0	0	0	0	0	4	0	2	0	0	252.313	38	12	6	0.333333	2	4	0	56.22	0	1.37	1.37	1.37	1.37	1.37	1.37	1.37	1.37	1.37	1.37	1.37	1.37	1.37	-1.52
imazamethabenz-methyl	Inhibitor of ALS		Y	81405-85-8	png	svg	COC(=O)C1=C(C=C(C)C=C1)C1=NC(C)(C(C)C)C(=O)N1	methyl 4-methyl-2-[4-methyl-5-oxo-4-(propan-2-yl)-4,5-dihydro-1H-imidazol-2-yl]benzoate	C16H20N2O3	C016H020N002O003	C016H020N002O003	16	20	20	0	0	0	0	0	2	0	3	0	0	288.342	41	15	6	0.285714	4	3	1	67.76	0	1.53	2.43	3	3.14	3.15	3.16	3.16	3.16	3.16	3.16	3.15	3.06	2.7	-3.67
imazamox	Inhibitor of ALS	Y	Y	114311-32-9	png	svg	COCC1=CN=C(C2=NC(C)(C(C)C)C(=O)N2)C(=C1)C(O)=O	5-(methoxymethyl)-2-[4-methyl-5-oxo-4-(propan-2-yl)-4,5-dihydro-1H-imidazol-2-yl]pyridine-3-carboxylic acid	C15H19N3O4	C015H019N003O004	C015H019N003O004	15	19	19	0	0	0	0	0	3	0	4	0	0	305.329	41	16	6	0.272727	5	6	1	103.71	-1	0.98	1.26	1.13	0.5	-0.43	-1.36	-2.19	-2.19	-2.19	-2.19	-2.21	-2.34	-2.77	-3.14
imazapic	Inhibitor of ALS	Y	Y	104098-48-8	png	svg	CC(C)C1(C)N=C(NC1=O)C1=NC=C(C)C=C1C(O)=O	5-methyl-2-[4-methyl-5-oxo-4-(propan-2-yl)-4,5-dihydro-1H-imidazol-2-yl]pyridine-3-carboxylic acid	C14H17N3O3	C014H017N003O003	C014H017N003O003	14	17	17	0	0	0	0	0	3	0	3	0	0	275.303	37	14	6	0.3	3	5	1	94.48	-1	1.31	1.8	1.75	1.14	0.22	-0.71	-1.55	-1.55	-1.55	-1.55	-1.57	-1.7	-2.13	-3
imazapyr	Inhibitor of ALS	Y	Y	81334-34-1	png	svg	CC(C)C1(C)N=C(NC1=O)C1=C(C=CC=N1)C(O)=O	2-[4-methyl-5-oxo-4-(propan-2-yl)-4,5-dihydro-1H-imidazol-2-yl]pyridine-3-carboxylic acid	C13H15N3O3	C013H015N003O003	C013H015N003O003	13	15	15	0	0	0	0	0	3	0	3	0	0	261.276	34	13	6	0.315789	3	5	1	94.48	-1	1.02	1.36	1.25	0.63	-0.3	-1.23	-2.06	-2.06	-2.06	-2.07	-2.08	-2.22	-2.65	-2.78
imazaquin	Inhibitor of ALS	Y	Y	81335-37-7	png	svg	CC(C)C1(C)N=C(NC1=O)C1=NC2=CC=CC=C2C=C1C(O)=O	2-[4-methyl-5-oxo-4-(propan-2-yl)-4,5-dihydro-1H-imidazol-2-yl]quinoline-3-carboxylic acid	C17H17N3O3	C017H017N003O003	C017H017N003O003	17	17	17	0	0	0	0	0	3	0	3	0	0	311.335	40	13	10	0.434783	3	5	1	94.48	-1	2.31	2.72	2.64	2.03	1.1	0.16	-0.69	-0.69	-0.69	-0.69	-0.71	-0.84	-1.27	-3.71
imazethapyr	Inhibitor of ALS	Y	Y	81335-77-5	png	svg	CCC1=CN=C(C2=NC(C)(C(C)C)C(=O)N2)C(=C1)C(O)=O	5-ethyl-2-[4-methyl-5-oxo-4-(propan-2-yl)-4,5-dihydro-1H-imidazol-2-yl]pyridine-3-carboxylic acid	C15H19N3O3	C015H019N003O003	C015H019N003O003	15	19	19	0	0	0	0	0	3	0	3	0	0	289.33	40	15	6	0.285714	4	5	1	94.48	-1	1.76	2.24	2.19	1.59	0.66	-0.27	-1.11	-1.11	-1.11	-1.11	-1.12	-1.26	-1.69	-3.14
imazosulfuron	Inhibitor of ALS			122548-33-8	png	svg	COC1=CC(OC)=NC(NC(=O)NS(=O)(=O)C2=C(Cl)N=C3C=CC=CN23)=N1	3-({2-chloroimidazo[1,2-a]pyridin-3-yl}sulfonyl)-1-(4,6-dimethoxypyrimidin-2-yl)urea	C14H13ClN6O5S	C014H013Cl001N006O005S001	C014H013Cl001N006O005S001	14	13	13	0	0	1	0	0	6	0	5	0	1	412.808	40	12	15	0.555556	4	9	1	134.01	-1	1.11	1.7	1.78	1.72	1.38	0.98	0.88	0.86	0.86	0.86	0.86	0.86	0.85	-4.27
indanofan	Inhibitor of cell division	Y	Y	133220-30-1	png	svg	CCC1(CC2(CO2)C2=CC(Cl)=CC=C2)C(=O)C2=CC=CC=C2C1=O	2-{[2-(3-chlorophenyl)oxiran-2-yl]methyl}-2-ethyl-2,3-dihydro-1H-indene-1,3-dione	C20H17ClO3	C020H017Cl001O003	C020H017Cl001O003	20	17	17	0	0	1	0	0	0	0	3	0	0	340.8	41	12	12	0.5	4	3	0	46.67	0	4.54	4.54	4.54	4.54	4.54	4.54	4.54	4.54	4.54	4.54	4.54	4.54	4.54	-5.38
indaziflam	Inhibitor of cellulose synthesis	Y		950782-86-2	png	svg	CC(F)C1=NC(N)=NC(NC2C(C)CC3=C2C=C(C)C=C3)=N1	2-N-(2,6-dimethyl-2,3-dihydro-1H-inden-1-yl)-6-(1-fluoroethyl)-1,3,5-triazine-2,4-diamine	C16H20FN5	C016H020F001N005	C016H020F001N005	16	20	20	0	0	0	1	0	5	0	0	0	0	301.362	42	10	12	0.545455	3	5	3	76.72	0	2.02	2.63	3.46	3.94	4.04	4.06	4.06	4.06	4.06	4.06	4.05	4.02	3.8	-3.73
iodosulfuron	Inhibitor of ALS		Y	185119-76-0	png	svg	COC(=O)C1=C(C=C(I)C=C1)S(=O)(=O)NC(=O)NC1=NC(OC)=NC(C)=N1	methyl 4-iodo-2-({[(4-methoxy-6-methyl-1,3,5-triazin-2-yl)carbamoyl]amino}sulfonyl)benzoate	C14H14IN5O6S	C014H014I001N005O006S001	C014H014I001N005O006S001	14	14	14	0	0	0	0	1	5	0	6	0	1	507.26	41	15	12	0.444444	5	9	1	146.67	-1	2.96	2.96	2.76	2.25	1.98	1.94	1.93	1.93	1.93	1.93	1.93	1.93	1.93	-3.12
iofensulfuron	Unknown mode of action			1144097-22-2	png	svg	COC1=NC(C)=NC(NC(=O)NS(=O)(=O)C2=CC=CC=C2I)=N1	1-(2-iodobenzenesulfonyl)-3-(4-methoxy-6-methyl-1,3,5-triazin-2-yl)urea	C12H12IN5O4S	C012H012I001N005O004S001	C012H012I001N005O004S001	12	12	12	0	0	0	0	1	5	0	4	0	1	449.224	35	11	12	0.521739	3	8	1	120.37	-1	2.91	2.91	2.71	2.2	1.93	1.88	1.88	1.88	1.88	1.88	1.88	1.88	1.87	-2.97
ioxynil	Inhibitor of photosynthesis		Y	1689-83-4	png	svg	OC1=C(I)C=C(C=C1I)C#N	4-hydroxy-3,5-diiodobenzonitrile	C7H3I2NO	C007H003I002N001O001	C007H003I002N001O001	7	3	3	0	0	0	0	2	1	0	1	0	0	370.914	14	5	6	0.545455	0	2	0	46.85	-1	3.38	3.38	3.38	3.36	3.18	2.56	1.81	1.48	1.42	1.42	1.42	1.42	1.42		-3.61
ipfencarbazone	Unknown mode of action			212201-70-2	png	svg	CC(C)N(C(=O)N1C=NN(C1=O)C1=C(Cl)C=C(Cl)C=C1)C1=C(F)C=C(F)C=C1	1-(2,4-dichlorophenyl)-N-(2,4-difluorophenyl)-5-oxo-N-(propan-2-yl)-4,5-dihydro-1H-1,2,4-triazole-4-carboxamide	C18H14Cl2F2N4O2	C018H014Cl002F002N004O002	C018H014Cl002F002N004O002	18	14	14	0	0	2	2	0	4	0	2	0	0	427.232	42	11	17	0.607143	3	3	0	56.22	0	4.94	4.94	4.94	4.94	4.94	4.94	4.94	4.94	4.94	4.94	4.94	4.94	4.94	-5.47
isopropalin	Unknown mode of action			33820-53-0	png	svg	CCCN(CCC)C1=C(C=C(C=C1[N+]([O-])=O)C(C)C)[N+]([O-])=O	2,6-dinitro-4-(propan-2-yl)-N,N-dipropylaniline	C15H23N3O4	C015H023N003O004	C015H023N003O004	15	23	23	0	0	0	0	0	3	0	4	0	0	309.361	45	16	6	0.272727	8	5	0	94.88	0	4.95	4.96	4.96	4.96	4.96	4.96	4.96	4.96	4.96	4.96	4.96	4.96	4.96		-6.45
isoproturon	Inhibitor of photosynthesis	Y	Y	34123-59-6	png	svg	CC(C)C1=CC=C(NC(=O)N(C)C)C=C1	3,3-dimethyl-1-[4-(propan-2-yl)phenyl]urea	C12H18N2O	C012H018N002O001	C012H018N002O001	12	18	18	0	0	0	0	0	2	0	1	0	0	206.284	33	9	6	0.4	2	1	1	32.34	0	2.57	2.57	2.57	2.57	2.57	2.57	2.57	2.57	2.57	2.57	2.57	2.55	2.43		-3.54
isouron	Inhibitor of photosynthesis	Y	Y	55861-78-4	png	svg	CN(C)C(=O)NC1=NOC(=C1)C(C)(C)C	1-(5-tert-butyl-1,2-oxazol-3-yl)-3,3-dimethylurea	C10H17N3O2	C010H017N003O002	C010H017N003O002	10	17	17	0	0	0	0	0	3	0	2	0	0	211.261	32	10	5	0.333333	2	2	1	58.37	0	1.75	1.75	1.75	1.75	1.75	1.75	1.75	1.75	1.74	1.66	1.27	0.69	0.48	-2.44
isoxaben	Inhibitor of cellulose synthesis	Y		82558-50-7	png	svg	CCC(C)(CC)C1=NOC(NC(=O)C2=C(OC)C=CC=C2OC)=C1	2,6-dimethoxy-N-[3-(3-methylpentan-3-yl)-1,2-oxazol-5-yl]benzamide	C18H24N2O4	C018H024N002O004	C018H024N002O004	18	24	24	0	0	0	0	0	2	0	4	0	0	332.394	48	13	11	0.458333	7	4	1	73.59	0	3.99	4.02	4.02	4.02	4.02	4.01	3.92	3.48	2.93	2.75	2.72	2.72	2.72	-3.94
isoxachlortole	Inhibitor of pigment synthesis			141112-06-3	png	svg	CS(=O)(=O)C1=C(C=CC(Cl)=C1)C(=O)C1=C(ON=C1)C1CC1	4-(4-chloro-2-methanesulfonylbenzoyl)-5-cyclopropyl-1,2-oxazole	C14H12ClNO4S	C014H012Cl001N001O004S001	C014H012Cl001N001O004S001	14	12	12	0	0	1	0	0	1	0	4	0	1	325.767	33	10	11	0.52381	4	4	0	77.24	0	1.86	1.86	1.86	1.86	1.86	1.86	1.86	1.86	1.86	1.86	1.86	1.86	1.86	-3.77
isoxaflutole	Inhibitor of pigment synthesis	Y		141112-29-0	png	svg	CS(=O)(=O)C1=C(C=CC(=C1)C(F)(F)F)C(=O)C1=C(ON=C1)C1CC1	5-cyclopropyl-4-[2-methanesulfonyl-4-(trifluoromethyl)benzoyl]-1,2-oxazole	C15H12F3NO4S	C015H012F003N001O004S001	C015H012F003N001O004S001	15	12	12	0	0	0	3	0	1	0	4	0	1	359.32	36	13	11	0.458333	5	4	0	77.24	0	2.13	2.14	2.14	2.14	2.14	2.14	2.14	2.14	2.14	2.14	2.14	2.14	2.14	-3.88
isoxapyrifop	Inhibitor of ACCase		Y	87757-18-4	png	svg	CC(OC1=CC=C(OC2=NC=C(Cl)C=C2Cl)C=C1)C(=O)N1CCCO1	2-{4-[(3,5-dichloropyridin-2-yl)oxy]phenoxy}-1-(1,2-oxazolidin-2-yl)propan-1-one	C17H16Cl2N2O4	C017H016Cl002N002O004	C017H016Cl002N002O004	17	16	16	0	0	2	0	0	2	0	4	0	0	383.226	41	13	12	0.48	5	4	0	60.89	0	3.63	3.63	3.63	3.63	3.63	3.63	3.63	3.63	3.63	3.63	3.63	3.62	3.6	-3.24
karbutilate	Inhibitor of photosynthesis			4849-32-5	png	svg	CN(C)C(=O)NC1=CC=CC(OC(=O)NC(C)(C)C)=C1	3-[(dimethylcarbamoyl)amino]phenyl N-tert-butylcarbamate	C14H21N3O3	C014H021N003O003	C014H021N003O003	14	21	21	0	0	0	0	0	3	0	3	0	0	279.335	41	14	6	0.3	4	2	2	70.67	0	1.88	1.88	1.88	1.88	1.88	1.88	1.88	1.88	1.88	1.88	1.87	1.78	1.35		-2.93
lactofen	Inhibitor of protoporphyrinogen oxidase	Y	Y	77501-63-4	png	svg	CCOC(=O)C(C)OC(=O)C1=C(C=CC(OC2=C(Cl)C=C(C=C2)C(F)(F)F)=C1)[N+]([O-])=O	ethyl 2-{5-[2-chloro-4-(trifluoromethyl)phenoxy]-2-nitrobenzoyloxy}propanoate	C19H15ClF3NO7	C019H015Cl001F003N001O007	C019H015Cl001F003N001O007	19	15	15	0	0	1	3	0	1	0	7	0	0	461.773	46	19	12	0.387097	10	4	0	107.65	0	5.45	5.45	5.45	5.45	5.45	5.45	5.45	5.45	5.45	5.45	5.45	5.45	5.45	-6.18
lenacil	Inhibitor of photosynthesis			2164-08-1	png	svg	O=C1NC2=C(CCC2)C(=O)N1C1CCCCC1	3-cyclohexyl-1H,2H,3H,4H,5H,6H,7H-cyclopenta[d]pyrimidine-2,4-dione	C13H18N2O2	C013H018N002O002	C013H018N002O002	13	18	18	0	0	0	0	0	2	0	2	0	0	234.294	35	11	6	0.352941	1	2	1	49.41	0	1.82	1.82	1.82	1.82	1.82	1.82	1.82	1.82	1.81	1.72	1.27	0.44	-0.24	-1.72
linuron	Inhibitor of photosynthesis	Y	Y	330-55-2	png	svg	CON(C)C(=O)NC1=CC(Cl)=C(Cl)C=C1	1-(3,4-dichlorophenyl)-3-methoxy-3-methylurea	C9H10Cl2N2O2	C009H010Cl002N002O002	C009H010Cl002N002O002	9	10	10	0	0	2	0	0	2	0	2	0	0	249.094	25	9	6	0.4	2	2	1	41.57	0	2.68	2.68	2.68	2.68	2.68	2.68	2.68	2.68	2.68	2.67	2.58	2.15	1.6		-3.52
MCPA	Synthetic auxin		Y	94-74-6	png	svg	CC1=CC(Cl)=CC=C1OCC(O)=O	2-(4-chloro-2-methylphenoxy)acetic acid	C9H9ClO3	C009H009Cl001O003	C009H009Cl001O003	9	9	9	0	0	1	0	0	0	0	3	0	0	200.619	22	7	6	0.461538	3	3	0	49.36	-1	2.41	2.37	2.09	1.34	0.38	-1.12	-1.12	-1.12	-1.12	-1.12	-1.12	-1.12	-1.12		-2.23
MCPA-thioethyl	Synthetic auxin		Y	25319-90-8	png	svg	CCSC(=O)COC1=C(C)C=C(Cl)C=C1	4-chloro-1-[2-(ethylsulfanyl)-2-oxoethoxy]-2-methylbenzene	C11H13ClO2S	C011H013Cl001O002S001	C011H013Cl001O002S001	11	13	13	0	0	1	0	0	0	0	2	0	1	244.738	28	9	6	0.4	5	2	0	26.3	0	3.56	3.56	3.56	3.56	3.56	3.56	3.56	3.56	3.56	3.56	3.56	3.56	3.56	-3.72
MCPB	Synthetic auxin		Y	94-81-5	png	svg	CC1=C(OCCCC(O)=O)C=CC(Cl)=C1	4-(4-chloro-2-methylphenoxy)butanoic acid	C11H13ClO3	C011H013Cl001O003	C011H013Cl001O003	11	13	13	0	0	1	0	0	0	0	3	0	0	228.672	28	9	6	0.4	5	3	0	49.36	-1	2.94	2.93	2.85	2.43	1.58	0.62	-0.59	-0.59	-0.59	-0.59	-0.59	-0.59	-0.59	-3.12
mecoprop	Synthetic auxin		Y	93-65-2	png	svg	CC(OC1=C(C)C=C(Cl)C=C1)C(O)=O	2-(4-chloro-2-methylphenoxy)propanoic acid	C10H11ClO3	C010H011Cl001O003	C010H011Cl001O003	10	11	11	0	0	1	0	0	0	0	3	0	0	214.646	25	8	6	0.428571	3	3	0	49.36	-1	2.98	2.94	2.71	2	1.05	0.14	-0.55	-0.55	-0.55	-0.55	-0.55	-0.55	-0.55		-2.55
mefenacet	Inhibitor of cell division	Y	Y	73250-68-7	png	svg	CN(C(=O)COC1=NC2=C(S1)C=CC=C2)C1=CC=CC=C1	2-(1,3-benzothiazol-2-yloxy)-N-methyl-N-phenylacetamide	C16H14N2O2S	C016H014N002O002S001	C016H014N002O002S001	16	14	14	0	0	0	0	0	2	0	2	0	1	298.36	35	6	15	0.714286	4	3	0	42.43	0	3.4	3.42	3.42	3.42	3.42	3.42	3.42	3.42	3.42	3.41	3.39	3.21	2.57	-4.09
mefluidide	Unknown mode of action			53780-34-0	png	svg	CC(=O)NC1=CC(NS(=O)(=O)C(F)(F)F)=C(C)C=C1C	N-(2,4-dimethyl-5-trifluoromethanesulfonamidophenyl)acetamide	C11H13F3N2O3S	C011H013F003N002O003S001	C011H013F003N002O003S001	11	13	13	0	0	0	3	0	2	0	3	0	1	310.293	33	14	6	0.3	3	4	1	72.47	-1	2.72	2.71	2.68	2.44	1.99	1.8	1.78	1.78	1.78	1.78	1.78	1.77	1.75		-3.24
mesosulfuron	Inhibitor of ALS		Y	400852-66-6	png	svg	COC1=CC(OC)=NC(NC(=O)NS(=O)(=O)C2=C(C=CC(CNS(C)(=O)=O)=C2)C(O)=O)=N1	2-({[(4,6-dimethoxypyrimidin-2-yl)carbamoyl]amino}sulfonyl)-4-(methanesulfonamidomethyl)benzoic acid	C16H19N5O9S2	C016H019N005O009S002	C016H019N005O009S002	16	19	19	0	0	0	0	0	5	0	9	0	2	489.48	51	20	12	0.375	7	12	2	203.01	-2	-0.33	-0.36	-1.31	-2.97	-4.23	-4.27	-4.27	-4.27	-4.28	-4.34	-4.66	-5.08	-5.2	-3.97
mesotrione	Inhibitor of pigment synthesis	Y	Y	104206-82-8	png	svg	CS(=O)(=O)C1=CC=C(C(=O)C2C(=O)CCCC2=O)C(=C1)[N+]([O-])=O	2-(4-methanesulfonyl-2-nitrobenzoyl)cyclohexane-1,3-dione	C14H13NO7S	C014H013N001O007S001	C014H013N001O007S001	14	13	13	0	0	0	0	0	1	0	7	0	1	339.321	36	17	6	0.26087	4	7	0	131.17	-1	0.9	0.86	0.58	-0.16	-1	-1.44	-1.44	-1.44	-1.44	-1.44	-1.44	-1.44	-1.44	-4.08
metam	Unknown mode of action			144-54-7	png	svg	[Na+].CNC([S-])=S	sodium (methylcarbamothioyl)sulfanide	C2H4NNaS2	C002H004N001Na001S002	C002H004N001S002	2	4	4	0	0	0	0	0	1	1	0	0	2	106.19	9	5	0	0	0	0	1	12.03	-1	1.15	1.15	1.11	0.83	0.29	0.03	-0.01	-0.01	-0.01	-0.01	-0.02	-0.06	-0.29	-1.6
metamitron	Inhibitor of photosynthesis	Y	Y	41394-05-2	png	svg	CC1=NN=C(C(=O)N1N)C1=CC=CC=C1	4-amino-3-methyl-6-phenyl-4,5-dihydro-1,2,4-triazin-5-one	C10H10N4O	C010H010N004O001	C010H010N004O001	10	10	10	0	0	0	0	0	4	0	1	0	0	202.213	25	3	12	0.8	1	4	2	71.05	0	-0.95	-0.09	0.35	0.43	0.44	0.44	0.44	0.44	0.44	0.44	0.44	0.44	0.44	-2.62
metazachlor	Inhibitor of cell division	Y	Y	67129-08-2	png	svg	CC1=CC=CC(C)=C1N(CN1C=CC=N1)C(=O)CCl	2-chloro-N-(2,6-dimethylphenyl)-N-(1H-pyrazol-1-ylmethyl)acetamide	C14H16ClN3O	C014H016Cl001N003O001	C014H016Cl001N003O001	14	16	16	0	0	1	0	0	3	0	1	0	0	277.749	35	8	11	0.578947	4	2	0	38.13	0	2.4	2.87	2.97	2.98	2.98	2.98	2.98	2.98	2.98	2.98	2.98	2.98	2.98	-2.74
metazosulfuron	Inhibitor of ALS	Y	Y	868680-84-6	png	svg	CC1CON=C(C2=C(S(NC(NC3=NC(OC)=CC(OC)=N3)=O)(=O)=O)N(C)N=C2Cl)O1	3-{[3-chloro-1-methyl-4-(5-methyl-5,6-dihydro-1,4,2-dioxazin-3-yl)-1H-pyrazol-5-yl]sulfonyl}-1-(4,6-dimethoxypyrimidin-2-yl)urea	C15H18ClN7O7S	C015H018Cl001N007O007S001	C015H018Cl001N007O007S001	15	18	18	0	0	1	0	0	7	0	7	0	1	475.864	49	20	11	0.354839	5	12	1	165.35	-1	1.37	1.77	1.83	1.77	1.43	1.03	0.92	0.91	0.91	0.91	0.91	0.9	0.9	-3.19
methabenzthiazuron	Inhibitor of photosynthesis			18691-97-9	png	svg	CNC(=O)N(C)C1=NC2=C(S1)C=CC=C2	1-(1,3-benzothiazol-2-yl)-1,3-dimethylurea	C10H11N3OS	C010H011N003O001S001	C010H011N003O001S001	10	11	11	0	0	0	0	0	3	0	1	0	1	221.279	26	6	9	0.6	1	2	1	45.23	0	1.79	1.79	1.79	1.79	1.79	1.79	1.79	1.79	1.79	1.79	1.79	1.79	1.79	-2.83
methazole	Unknown mode of action	Y	Y	20354-26-1	png	svg	CN1C(=O)ON(C1=O)C1=CC(Cl)=C(Cl)C=C1	2-(3,4-dichlorophenyl)-4-methyl-1,2,4-oxadiazolidine-3,5-dione	C9H6Cl2N2O3	C009H006Cl002N002O003	C009H006Cl002N002O003	9	6	6	0	0	2	0	0	2	0	3	0	0	261.062	22	5	11	0.6875	1	2	0	49.85	0	2.77	2.77	2.77	2.77	2.77	2.77	2.77	2.77	2.77	2.77	2.77	2.77	2.77		-2.82
methiozolin	Unknown mode of action			403640-27-7	png	svg	CC1=C(SC=C1)C1=NOC(C)(COCC2=C(F)C=CC=C2F)C1	5-{[(2,6-difluorophenyl)methoxy]methyl}-5-methyl-3-(3-methylthiophen-2-yl)-4,5-dihydro-1,2-oxazole	C17H17F2NO2S	C017H017F002N001O002S001	C017H017F002N001O002S001	17	17	17	0	0	0	2	0	1	0	2	0	1	337.384	40	12	11	0.478261	5	3	0	30.82	0	3.68	4.35	4.56	4.58	4.59	4.59	4.59	4.59	4.59	4.59	4.59	4.59	4.59	-5.09
methoprotryne	Inhibitor of photosynthesis		Y	841-06-5	png	svg	COCCCNC1=NC(SC)=NC(NC(C)C)=N1	2-N-(3-methoxypropyl)-6-(methylsulfanyl)-4-N-(propan-2-yl)-1,3,5-triazine-2,4-diamine	C11H21N5OS	C011H021N005O001S001	C011H021N005O001S001	11	21	21	0	0	0	0	0	5	0	1	0	1	271.382	39	12	6	0.333333	8	6	2	71.96	0	0.29	0.29	0.44	0.99	1.76	2.17	2.24	2.25	2.25	2.25	2.25	2.25	2.22	-3.85
methoxyphenone	Inhibitor of photosynthesis	Y		41295-28-7	png	svg	COC1=C(C)C=C(C=C1)C(=O)C1=CC(C)=CC=C1	(4-methoxy-3-methylphenyl)(3-methylphenyl)methanone	C16H16O2	C016H016O002	C016H016O002	16	16	16	0	0	0	0	0	0	0	2	0	0	240.297	34	6	12	0.666667	3	2	0	26.3	0	4.3	4.3	4.3	4.3	4.3	4.3	4.3	4.3	4.3	4.3	4.3	4.3	4.3	-4.66
methyldymron	Inhibitor of cell division	Y	Y	42609-73-4	png	svg	CN(C(=O)NC(C)(C)C1=CC=CC=C1)C1=CC=CC=C1	1-methyl-1-phenyl-3-(2-phenylpropan-2-yl)urea	C17H20N2O	C017H020N002O001	C017H020N002O001	17	20	20	0	0	0	0	0	2	0	1	0	0	268.353	40	8	12	0.6	3	1	1	32.34	0	3.39	3.39	3.39	3.39	3.39	3.39	3.39	3.39	3.39	3.39	3.39	3.39	3.38	-3.65
metobenzuron	Inhibitor of photosynthesis		Y	111578-32-6	png	svg	CON(C)C(=O)NC1=CC=C(OC2=CC3=C(C=C2)C(C)(C)CC(C)(OC)O3)C=C1	3-methoxy-1-{4-[(2-methoxy-2,4,4-trimethyl-3,4-dihydro-2H-1-benzopyran-7-yl)oxy]phenyl}-3-methylurea	C22H28N2O5	C022H028N002O005	C022H028N002O005	22	28	28	0	0	0	0	0	2	0	5	0	0	400.468	57	17	12	0.413793	5	4	1	69.26	0	4.19	4.19	4.19	4.19	4.19	4.19	4.19	4.19	4.19	4.18	4.15	3.94	3.36	-4.72
metobromuron	Inhibitor of photosynthesis	Y		3060-89-7	png	svg	CON(C)C(=O)NC1=CC=C(Br)C=C1	1-(4-bromophenyl)-3-methoxy-3-methylurea	C9H11BrN2O2	C009H011Br001N002O002	C009H011Br001N002O002	9	11	11	0	1	0	0	0	2	0	2	0	0	259.1	25	8	6	0.428571	2	2	1	41.57	0	2.24	2.24	2.24	2.24	2.24	2.24	2.24	2.24	2.24	2.24	2.17	1.81	1.22	-2.9
metolachlor	Inhibitor of cell division	Y	Y	51218-45-2	png	svg	CCC1=C(N(C(C)COC)C(=O)CCl)C(C)=CC=C1	2-chloro-N-(2-ethyl-6-methylphenyl)-N-(1-methoxypropan-2-yl)acetamide	C15H22ClNO2	C015H022Cl001N001O002	C015H022Cl001N001O002	15	22	22	0	0	1	0	0	1	0	2	0	0	283.794	41	13	6	0.315789	6	2	0	29.54	0	3.45	3.45	3.45	3.45	3.45	3.45	3.45	3.45	3.45	3.45	3.45	3.45	3.45		-2.73
metosulam	Inhibitor of ALS	Y	Y	139528-85-1	png	svg	COC1=NC2=NC(=NN2C(OC)=C1)S(=O)(=O)NC1=C(Cl)C=CC(C)=C1Cl	N-(2,6-dichloro-3-methylphenyl)-5,7-dimethoxy-[1,2,4]triazolo[1,5-a]pyrimidine-2-sulfonamide	C14H13Cl2N5O4S	C014H013Cl002N005O004S001	C014H013Cl002N005O004S001	14	13	13	0	0	2	0	0	5	0	4	0	1	418.255	39	11	15	0.576923	4	7	1	107.71	0	3.47	3.47	3.47	3.47	3.47	3.47	3.45	3.34	2.93	2.6	2.53	2.53	2.53	-4.32
metoxuron	Inhibitor of photosynthesis	Y	Y	19937-59-8	png	svg	COC1=C(Cl)C=C(NC(=O)N(C)C)C=C1	1-(3-chloro-4-methoxyphenyl)-3,3-dimethylurea	C10H13ClN2O2	C010H013Cl001N002O002	C010H013Cl001N002O002	10	13	13	0	0	1	0	0	2	0	2	0	0	228.675	28	9	6	0.4	2	2	1	41.57	0	1.77	1.77	1.77	1.77	1.77	1.77	1.77	1.77	1.77	1.77	1.77	1.75	1.62	-2.71
metribuzin	Inhibitor of photosynthesis	Y	Y	21087-64-9	png	svg	CSC1=NN=C(C(=O)N1N)C(C)(C)C	4-amino-6-tert-butyl-3-(methylsulfanyl)-4,5-dihydro-1,2,4-triazin-5-one	C8H14N4OS	C008H014N004O001S001	C008H014N004O001S001	8	14	14	0	0	0	0	0	4	0	1	0	1	214.288	28	8	6	0.428571	2	4	2	71.05	0	0.87	1.63	1.91	1.96	1.96	1.96	1.96	1.96	1.96	1.96	1.96	1.96	1.96	-2.2
metsulfuron-methyl	Inhibitor of ALS		Y	74223-64-6	png	svg	COC(=O)C1=CC=CC=C1S(=O)(=O)NC(=O)NC1=NC(OC)=NC(C)=N1	methyl 2-({[(4-methoxy-6-methyl-1,3,5-triazin-2-yl)carbamoyl]amino}sulfonyl)benzoate	C14H15N5O6S	C014H015N005O006S001	C014H015N005O006S001	14	15	15	0	0	0	0	0	5	0	6	0	1	381.364	41	14	12	0.461538	5	9	1	146.67	-1	2.08	2.08	1.87	1.37	1.1	1.05	1.05	1.05	1.05	1.05	1.05	1.05	1.04	-4.29
molinate	Inhibitor of lipid synthesis			2212-67-1	png	svg	CCSC(=O)N1CCCCCC1	azepan-1-yl(ethylsulfanyl)methanone	C9H17NOS	C009H017N001O001S001	C009H017N001O001S001	9	17	17	0	0	0	0	0	1	0	1	0	1	187.302	29	12	0	0	2	1	0	20.31	0	2.34	2.34	2.34	2.34	2.34	2.34	2.34	2.34	2.34	2.34	2.34	2.34	2.34	-2.1
monalide	Unknown mode of action		Y	7287-36-7	png	svg	CCCC(C)(C)C(=O)NC1=CC=C(Cl)C=C1	N-(4-chlorophenyl)-2,2-dimethylpentanamide	C13H18ClNO	C013H018Cl001N001O001	C013H018Cl001N001O001	13	18	18	0	0	1	0	0	1	0	1	0	0	239.741	34	10	6	0.375	4	1	1	29.1	0	4.5	4.5	4.5	4.5	4.5	4.5	4.5	4.5	4.5	4.5	4.5	4.49	4.38	-3.97
monolinuron	Inhibitor of photosynthesis	Y	Y	1746-81-2	png	svg	CON(C)C(=O)NC1=CC=C(Cl)C=C1	1-(4-chlorophenyl)-3-methoxy-3-methylurea	C9H11ClN2O2	C009H011Cl001N002O002	C009H011Cl001N002O002	9	11	11	0	0	1	0	0	2	0	2	0	0	214.649	25	8	6	0.428571	2	2	1	41.57	0	2.08	2.08	2.08	2.08	2.08	2.08	2.08	2.08	2.08	2.07	2.01	1.66	1.07		-2.57
monuron	Inhibitor of photosynthesis			150-68-5	png	svg	CN(C)C(=O)NC1=CC=C(Cl)C=C1	1-(4-chlorophenyl)-3,3-dimethylurea	C9H11ClN2O	C009H011Cl001N002O001	C009H011Cl001N002O001	9	11	11	0	0	1	0	0	2	0	1	0	0	198.649	24	7	6	0.461538	1	1	1	32.34	0	1.93	1.93	1.93	1.93	1.93	1.93	1.93	1.93	1.93	1.93	1.93	1.89	1.66		-2.89
MSMA	Unknown mode of action			2163-80-6	png	svg	[Na+].C[As](O)([O-])=O	sodium hydrogen methylarsonate	CH4AsNaO3	C001H004As001Na001O003	C001H004As001O003	1	4	4	1	0	0	0	0	0	1	3	0	1	138.963	9	5	0	0	0	3	1	60.36	-1	-0.91	-0.92	-0.98	-1.32	-2.11	-2.85	-3.2	-3.39	-4.04	-4.87	-5.33	-5.44	-5.44	0.38
naproanilide	Unknown mode of action			52570-16-8	png	svg	CC(OC1=CC2=CC=CC=C2C=C1)C(=O)NC1=CC=CC=C1	2-(naphthalen-2-yloxy)-N-phenylpropanamide	C19H17NO2	C019H017N001O002	C019H017N001O002	19	17	17	0	0	0	0	0	1	0	2	0	0	291.344	39	6	16	0.727273	4	2	1	38.33	0	4.29	4.29	4.29	4.29	4.29	4.29	4.29	4.29	4.29	4.28	4.27	4.14	3.62	-5.32
napropamide	Inhibitor of cell division	Y		15299-99-7	png	svg	CCN(CC)C(=O)C(C)OC1=C2C=CC=CC2=CC=C1	N,N-diethyl-2-(naphthalen-1-yloxy)propanamide	C17H21NO2	C017H021N001O002	C017H021N001O002	17	21	21	0	0	0	0	0	1	0	2	0	0	271.354	41	10	10	0.5	5	2	0	29.54	0	3.21	3.21	3.21	3.21	3.21	3.21	3.21	3.21	3.21	3.21	3.21	3.21	3.21		-3.57
naptalam	Inhibitor of auxin transport	Y		132-66-1	png	svg	OC(=O)C1=C(C=CC=C1)C(=O)NC1=C2C=CC=CC2=CC=C1	2-[(naphthalen-1-yl)carbamoyl]benzoic acid	C18H13NO3	C018H013N001O003	C018H013N001O003	18	13	13	0	0	0	0	0	1	0	3	0	0	291.301	35	6	16	0.727273	3	3	1	69.23	-1	3.7	3.6	3.1	2.21	1.26	0.18	0.18	0.18	0.18	0.16	-0.01	-0.55	-1	-4.89
NC-330	Inhibitor of ALS		Y	104770-29-8	png	svg	COC(=O)C1=C(N(N=C1)C1=NC=CC=C1)S(=O)(=O)NC(=O)NC1=NC(C)=CC(C)=N1	methyl 5-({[(4,6-dimethylpyrimidin-2-yl)carbamoyl]amino}sulfonyl)-1-(pyridin-2-yl)-1H-pyrazole-4-carboxylate	C17H17N7O5S	C017H017N007O005S001	C017H017N007O005S001	17	17	17	0	0	0	0	0	7	0	5	0	1	431.426	47	13	17	0.566667	5	9	1	155.26	-1	0.02	0.76	1	0.96	0.62	0.22	0.12	0.11	0.11	0.11	0.11	0.11	0.1	-3.81
neburon	Inhibitor of photosynthesis	Y		555-37-3	png	svg	CCCCN(C)C(=O)NC1=CC(Cl)=C(Cl)C=C1	3-butyl-1-(3,4-dichlorophenyl)-3-methylurea	C12H16Cl2N2O	C012H016Cl002N002O001	C012H016Cl002N002O001	12	16	16	0	0	2	0	0	2	0	1	0	0	275.174	33	11	6	0.352941	4	1	1	32.34	0	3.86	3.86	3.86	3.86	3.86	3.86	3.86	3.86	3.86	3.86	3.85	3.79	3.45		-4.77
nicosulfuron	Inhibitor of ALS		Y	111991-09-4	png	svg	COC1=CC(OC)=NC(NC(=O)NS(=O)(=O)C2=C(C=CC=N2)C(=O)N(C)C)=N1	2-({[(4,6-dimethoxypyrimidin-2-yl)carbamoyl]amino}sulfonyl)-N,N-dimethylpyridine-3-carboxamide	C15H18N6O6S	C015H018N006O006S001	C015H018N006O006S001	15	18	18	0	0	0	0	0	6	0	6	0	1	410.405	46	16	12	0.428571	5	10	1	149.91	-1	0.32	0.7	0.76	0.69	0.33	-0.06	-0.15	-0.16	-0.16	-0.16	-0.16	-0.16	-0.17	-4.11
nitrofen	Unknown mode of action	Y		1836-75-5	png	svg	[O-][N+](=O)C1=CC=C(OC2=C(Cl)C=C(Cl)C=C2)C=C1	2,4-dichloro-1-(4-nitrophenoxy)benzene	C12H7Cl2NO3	C012H007Cl002N001O003	C012H007Cl002N001O003	12	7	7	0	0	2	0	0	1	0	3	0	0	284.095	25	6	12	0.666667	3	2	0	55.05	0	4.62	4.62	4.62	4.62	4.62	4.62	4.62	4.62	4.62	4.62	4.62	4.62	4.62		-5.46
norflurazon	Inhibitor of pigment synthesis	Y		27314-13-2	png	svg	CNC1=C(Cl)C(=O)N(N=C1)C1=CC(=CC=C1)C(F)(F)F	4-chloro-5-(methylamino)-2-[3-(trifluoromethyl)phenyl]-2,3-dihydropyridazin-3-one	C12H9ClF3N3O	C012H009Cl001F003N003O001	C012H009Cl001F003N003O001	12	9	9	0	0	1	3	0	3	0	1	0	0	303.668	29	8	12	0.6	3	3	1	44.7	0	2.42	2.42	2.42	2.42	2.42	2.42	2.42	2.42	2.42	2.42	2.42	2.42	2.42		-4.04
OK-8910	Unknown mode of action			134019-30-0	png	svg	CC1CC(O)C(C(=O)NC2=C(F)C=CC=C2)C1=O	N-(2-fluorophenyl)-5-hydroxy-3-methyl-2-oxocyclopentane-1-carboxamide	C13H14FNO3	C013H014F001N001O003	C013H014F001N001O003	13	14	14	0	0	0	1	0	1	0	3	0	0	251.254	32	12	6	0.333333	2	3	2	66.4	0	1.67	1.67	1.67	1.67	1.67	1.67	1.67	1.67	1.66	1.64	1.41	0.5	-0.86	-1.43
oleic acid	Unknown mode of action			112-80-1	png	svg	CCCCCCCC\C=C\CCCCCCCC(O)=O	(9E)-octadec-9-enoic acid	C18H34O2	C018H034O002	C018H034O002	18	34	34	0	0	0	0	0	0	0	2	0	0	282.461	54	20	0	0	15	2	0	40.13	-1	6.78	6.78	6.77	6.68	6.23	5.36	4.4	3.25	3.25	3.25	3.25	3.25	3.25	-6.37
orbencarb	Inhibitor of lipid synthesis	Y		34622-58-7	png	svg	CCN(CC)C(=O)SCC1=CC=CC=C1Cl	N,N-diethyl{[(2-chlorophenyl)methyl]sulfanyl}formamide	C12H16ClNOS	C012H016Cl001N001O001S001	C012H016Cl001N001O001S001	12	16	16	0	0	1	0	0	1	0	1	0	1	257.78	32	10	6	0.375	5	1	0	20.31	0	3.73	3.73	3.73	3.73	3.73	3.73	3.73	3.73	3.73	3.73	3.73	3.73	3.73	-4.18
orthosulfamuron	Inhibitor of ALS		Y	213464-77-8	png	svg	COC1=CC(OC)=NC(NC(=O)NS(=O)(=O)NC2=CC=CC=C2C(=O)N(C)C)=N1	2-[({[(4,6-dimethoxypyrimidin-2-yl)carbamoyl]amino}sulfonyl)amino]-N,N-dimethylbenzamide	C16H20N6O6S	C016H020N006O006S001	C016H020N006O006S001	16	20	20	0	0	0	0	0	6	0	6	0	1	424.432	49	17	12	0.413793	5	10	2	149.05	-1	0.25	0.59	0.41	-0.03	-0.2	-0.23	-0.23	-0.23	-0.23	-0.23	-0.24	-0.34	-0.75	-4.57
oryzalin	Inhibitor of microtubule assembly	Y		19044-88-3	png	svg	CCCN(CCC)C1=C(C=C(C=C1[N+]([O-])=O)S(N)(=O)=O)[N+]([O-])=O	4-(dipropylamino)-3,5-dinitrobenzene-1-sulfonamide	C12H18N4O6S	C012H018N004O006S001	C012H018N004O006S001	12	18	18	0	0	0	0	0	4	0	6	0	1	346.36	41	17	6	0.26087	8	7	2	155.04	0	2.33	2.33	2.33	2.33	2.33	2.33	2.32	2.31	2.22	1.84	1.48	1.39	1.38		-5.16
oxadiargyl	Inhibitor of protoporphyrinogen oxidase	Y	Y	39807-15-3	png	svg	CC(C)(C)C1=NN(C(=O)O1)C1=C(Cl)C=C(Cl)C(OCC#C)=C1	5-tert-butyl-3-[2,4-dichloro-5-(prop-2-yn-1-yloxy)phenyl]-2,3-dihydro-1,3,4-oxadiazol-2-one	C15H14Cl2N2O3	C015H014Cl002N002O003	C015H014Cl002N002O003	15	14	14	0	0	2	0	0	2	0	3	0	0	341.189	36	11	11	0.5	4	4	0	51.13	0	4.77	4.77	4.77	4.77	4.77	4.77	4.77	4.77	4.77	4.77	4.77	4.77	4.77	-4.61
oxadiazon	Inhibitor of protoporphyrinogen oxidase	Y	Y	19666-30-9	png	svg	CC(C)OC1=CC(N2N=C(OC2=O)C(C)(C)C)=C(Cl)C=C1Cl	5-tert-butyl-3-[2,4-dichloro-5-(propan-2-yloxy)phenyl]-2,3-dihydro-1,3,4-oxadiazol-2-one	C15H18Cl2N2O3	C015H018Cl002N002O003	C015H018Cl002N002O003	15	18	18	0	0	2	0	0	2	0	3	0	0	345.221	40	11	11	0.5	4	4	0	51.13	0	5.31	5.31	5.31	5.31	5.31	5.31	5.31	5.31	5.31	5.31	5.31	5.31	5.31		-5.69
oxasulfuron	Inhibitor of ALS			144651-06-9	png	svg	CC1=CC(C)=NC(NC(=O)NS(=O)(=O)C2=CC=CC=C2C(=O)OC2COC2)=N1	oxetan-3-yl 2-({[(4,6-dimethylpyrimidin-2-yl)carbamoyl]amino}sulfonyl)benzoate	C17H18N4O6S	C017H018N004O006S001	C017H018N004O006S001	17	18	18	0	0	0	0	0	4	0	6	0	1	406.413	46	16	12	0.428571	5	8	1	133.78	-1	0.36	1.02	1.06	0.65	0.43	0.4	0.4	0.4	0.4	0.4	0.4	0.4	0.39	-4.2
oxaziclomefone	Unknown mode of action	Y		153197-14-9	png	svg	CC1=C(C(=O)N(CO1)C(C)(C)C1=CC(Cl)=CC(Cl)=C1)C1=CC=CC=C1	3-[2-(3,5-dichlorophenyl)propan-2-yl]-6-methyl-5-phenyl-3,4-dihydro-2H-1,3-oxazin-4-one	C20H19Cl2NO2	C020H019Cl002N001O002	C020H019Cl002N001O002	20	19	19	0	0	2	0	0	1	0	2	0	0	376.276	44	13	12	0.48	3	2	0	29.54	0	4.97	5	5	5	5	5	5	5	5	5	5	5	5	-5.19
oxyfluorfen	Inhibitor of protoporphyrinogen oxidase	Y	Y	42874-03-3	png	svg	CCOC1=C(C=CC(OC2=C(Cl)C=C(C=C2)C(F)(F)F)=C1)[N+]([O-])=O	4-[2-chloro-4-(trifluoromethyl)phenoxy]-2-ethoxy-1-nitrobenzene	C15H11ClF3NO4	C015H011Cl001F003N001O004	C015H011Cl001F003N001O004	15	11	11	0	0	1	3	0	1	0	4	0	0	361.7	35	12	12	0.5	6	3	0	64.28	0	5.09	5.09	5.09	5.09	5.09	5.09	5.09	5.09	5.09	5.09	5.09	5.09	5.09	-5.67
paraquat	Unknown mode of action			1910-42-5	png	svg	[Cl-].[Cl-].C[N+]1=CC=C(C=C1)C1=CC=[N+](C)C=C1	1-methyl-4-(1-methylpyridin-1-ium-4-yl)pyridin-1-ium dichloride	C12H14Cl2N2	C012H014Cl002N002	C012H014N002	12	14	14	0	0	2	0	0	2	0	0	0	0	186.252	28	2	12	0.857143	1	0	0	7.76	2	-6.7	-6.7	-6.7	-6.7	-6.7	-6.7	-6.7	-6.7	-6.7	-6.7	-6.7	-6.7	-6.7	-5.83
pebulate	Inhibitor of lipid synthesis	Y		1114-71-2	png	svg	CCCCN(CC)C(=O)SCCC	N-butyl-N-ethyl(propylsulfanyl)formamide	C10H21NOS	C010H021N001O001S001	C010H021N001O001S001	10	21	21	0	0	0	0	0	1	0	1	0	1	203.345	34	13	0	0	7	1	0	20.31	0	3.25	3.25	3.25	3.25	3.25	3.25	3.25	3.25	3.25	3.25	3.25	3.25	3.25		-3.35
pelargonic acid	Unknown mode of action		Y	112-05-0	png	svg	CCCCCCCCC(O)=O	nonanoic acid	C9H18O2	C009H018O002	C009H018O002	9	18	18	0	0	0	0	0	0	0	2	0	0	158.238	29	11	0	0	7	2	0	40.13	-1	3.14	3.14	3.14	3.08	2.75	1.95	0.99	-0.38	-0.38	-0.38	-0.38	-0.38	-0.38		-2.75
pendimethalin	Inhibitor of microtubule assembly	Y	Y	40487-42-1	png	svg	CCC(CC)NC1=C(C(C)=C(C)C=C1[N+]([O-])=O)[N+]([O-])=O	3,4-dimethyl-2,6-dinitro-N-(pentan-3-yl)aniline	C13H19N3O4	C013H019N003O004	C013H019N003O004	13	19	19	0	0	0	0	0	3	0	4	0	0	281.308	39	14	6	0.3	6	5	1	103.67	0	4.82	4.82	4.82	4.82	4.82	4.82	4.82	4.82	4.81	4.71	4.25	3.47	2.99	-3.94
penoxsulam	Inhibitor of ALS	Y	Y	219714-96-2	png	svg	COC1=CN=C(OC)N2N=C(NS(=O)(=O)C3=C(OCC(F)F)C=CC=C3C(F)(F)F)N=C12	2-(2,2-difluoroethoxy)-N-{5,8-dimethoxy-[1,2,4]triazolo[1,5-c]pyrimidin-2-yl}-6-(trifluoromethyl)benzene-1-sulfonamide	C16H14F5N5O5S	C016H014F005N005O005S001	C016H014F005N005O005S001	16	14	14	0	0	0	5	0	5	0	5	0	1	483.37	46	17	15	0.46875	8	9	0	114.14	-1	2.69	2.69	2.69	2.69	2.66	2.49	2.04	1.79	1.75	1.75	1.75	1.75	1.75	-3.63
pentachlorophenol	Unknown mode of action			87-86-5	png	svg	OC1=C(Cl)C(Cl)=C(Cl)C(Cl)=C1Cl	pentachlorophenol	C6HCl5O	C006H001Cl005O001	C006H001Cl005O001	6	1	1	0	0	5	0	0	0	0	1	0	0	266.337	13	6	6	0.5	0	1	0	23.06	-1	4.69	4.69	4.68	4.59	4.15	3.37	2.89	2.77	2.77	2.77	2.77	2.77	2.77		-4.28
pentanochlor	Inhibitor of photosynthesis	Y	Y	2307-68-8	png	svg	CCCC(C)C(=O)NC1=CC(Cl)=C(C)C=C1	N-(3-chloro-4-methylphenyl)-2-methylpentanamide	C13H18ClNO	C013H018Cl001N001O001	C013H018Cl001N001O001	13	18	18	0	0	1	0	0	1	0	1	0	0	239.741	34	10	6	0.375	4	1	1	29.1	0	4.46	4.46	4.46	4.46	4.46	4.46	4.46	4.46	4.46	4.46	4.46	4.45	4.38	-3.98
pentoxazone	Inhibitor of protoporphyrinogen oxidase	Y	Y	110956-75-7	png	svg	CC(C)=C1OC(=O)N(C1=O)C1=CC(OC2CCCC2)=C(Cl)C=C1F	3-[4-chloro-5-(cyclopentyloxy)-2-fluorophenyl]-5-(propan-2-ylidene)-1,3-oxazolidine-2,4-dione	C17H17ClFNO4	C017H017Cl001F001N001O004	C017H017Cl001F001N001O004	17	17	17	0	0	1	1	0	1	0	4	0	0	353.773	41	18	6	0.25	3	3	0	55.84	0	4.26	4.26	4.26	4.26	4.26	4.26	4.26	4.26	4.26	4.26	4.26	4.26	4.26	-4.93
pethoxamid	Inhibitor of cell division	Y	Y	106700-29-2	png	svg	CCOCCN(C(=O)CCl)C(=C(C)C)C1=CC=CC=C1	2-chloro-N-(2-ethoxyethyl)-N-(2-methyl-1-phenylprop-1-en-1-yl)acetamide	C16H22ClNO2	C016H022Cl001N001O002	C016H022Cl001N001O002	16	22	22	0	0	1	0	0	1	0	2	0	0	295.804	42	14	6	0.3	7	2	0	29.54	0	2.84	2.84	2.84	2.84	2.84	2.84	2.84	2.84	2.84	2.84	2.84	2.84	2.84	-3.33
phenmedipham	Inhibitor of photosynthesis		Y	13684-63-4	png	svg	COC(=O)NC1=CC=CC(OC(=O)NC2=CC(C)=CC=C2)=C1	3-[(methoxycarbonyl)amino]phenyl N-(3-methylphenyl)carbamate	C16H16N2O4	C016H016N002O004	C016H016N002O004	16	16	16	0	0	0	0	0	2	0	4	0	0	300.309	38	10	12	0.545455	5	4	2	76.66	0	3.86	3.86	3.86	3.86	3.86	3.86	3.86	3.86	3.86	3.85	3.8	3.43	2.24	-4.18
picloram	Synthetic auxin			1918-02-1	png	svg	NC1=C(Cl)C(Cl)=NC(C(O)=O)=C1Cl	4-amino-3,5,6-trichloropyridine-2-carboxylic acid	C6H3Cl3N2O2	C006H003Cl003N002O002	C006H003Cl003N002O002	6	3	3	0	0	3	0	0	2	0	2	0	0	241.459	16	7	6	0.461538	1	4	2	79.04	-1	1.97	1.97	1.89	1.43	0.56	-0.4	-1.53	-1.53	-1.53	-1.53	-1.53	-1.53	-1.53		-2.75
picolinafen	Inhibitor of pigment synthesis		Y	137641-05-5	png	svg	FC1=CC=C(NC(=O)C2=NC(OC3=CC=CC(=C3)C(F)(F)F)=CC=C2)C=C1	N-(4-fluorophenyl)-6-[3-(trifluoromethyl)phenoxy]pyridine-2-carboxamide	C19H12F4N2O2	C019H012F004N002O002	C019H012F004N002O002	19	12	12	0	0	0	4	0	2	0	2	0	0	376.304	39	9	18	0.666667	5	2	1	51.22	0	5.35	5.35	5.35	5.35	5.35	5.35	5.35	5.35	5.32	5.12	4.56	4.14	4.06	-5.12
pinoxaden	Inhibitor of ACCase		Y	243973-20-8	png	svg	CCC1=CC(C)=CC(CC)=C1C1=C(OC(=O)C(C)(C)C)N2CCOCCN2C1=O	8-(2,6-diethyl-4-methylphenyl)-9-oxo-1H,2H,4H,5H,9H-pyrazolo[1,2-d][1,4,5]oxadiazepin-7-yl 2,2-dimethylpropanoate	C23H32N2O4	C023H032N002O004	C023H032N002O004	23	32	32	0	0	0	0	0	2	0	4	0	0	400.511	61	18	11	0.37931	5	4	0	59.08	0	5.08	5.08	5.08	5.08	5.08	5.08	5.08	5.08	5.08	5.08	5.08	5.08	5.08	-3.28
piperophos	Inhibitor of cell division			24151-93-7	png	svg	CCCOP(=S)(OCCC)SCC(=O)N1CCCCC1C	dipropyl {[2-(2-methylpiperidin-1-yl)-2-oxoethyl]sulfanyl}(sulfanylidene)phosphonite	C14H28NO3PS2	C014H028N001O003P001S002	C014H028N001O003P001S002	14	28	28	0	0	0	0	0	1	0	3	1	2	353.481	49	21	0	0	9	1	0	38.77	0	3.59	3.59	3.59	3.59	3.59	3.59	3.59	3.59	3.59	3.59	3.59	3.59	3.59	-5.04
pretilachlor	Inhibitor of cell division			51218-49-6	png	svg	CCCOCCN(C(=O)CCl)C1=C(CC)C=CC=C1CC	2-chloro-N-(2,6-diethylphenyl)-N-(2-propoxyethyl)acetamide	C17H26ClNO2	C017H026Cl001N001O002	C017H026Cl001N001O002	17	26	26	0	0	1	0	0	1	0	2	0	0	311.847	47	15	6	0.285714	9	2	0	29.54	0	4.36	4.36	4.36	4.36	4.36	4.36	4.36	4.36	4.36	4.36	4.36	4.36	4.36	-4.31
primisulfuron-methyl	Inhibitor of ALS		Y	86209-51-0	png	svg	COC(=O)C1=C(C=CC=C1)S(=O)(=O)NC(=O)NC1=NC(OC(F)F)=CC(OC(F)F)=N1	methyl 2-[({[4,6-bis(difluoromethoxy)pyrimidin-2-yl]carbamoyl}amino)sulfonyl]benzoate	C15H12F4N4O7S	C015H012F004N004O007S001	C015H012F004N004O007S001	15	12	12	0	0	0	4	0	4	0	7	0	1	468.337	43	19	12	0.387097	8	9	1	143.01	-1	3.92	3.93	3.73	3.27	3.05	3.02	3.02	3.02	3.02	3.02	3.02	3.02	3.01	-3.97
prodiamine	Inhibitor of microtubule assembly	Y		29091-21-2	png	svg	CCCN(CCC)C1=C(C(N)=C(C=C1[N+]([O-])=O)C(F)(F)F)[N+]([O-])=O	2,6-dinitro-1-N,1-N-dipropyl-4-(trifluoromethyl)benzene-1,3-diamine	C13H17F3N4O4	C013H017F003N004O004	C013H017F003N004O004	13	17	17	0	0	0	3	0	4	0	4	0	0	350.294	41	18	6	0.25	8	6	2	120.9	0	4.41	4.42	4.42	4.42	4.42	4.42	4.42	4.42	4.42	4.41	4.37	4.09	3.38	-5.49
profluazol	Inhibitor of protoporphyrinogen oxidase			190314-43-3	png	svg	FC1CC2N(C1)C(=O)N(C2=O)C1=CC(NS(=O)(=O)CCl)=C(Cl)C=C1F	1-chloro-N-(2-chloro-4-fluoro-5-{6-fluoro-1,3-dioxo-hexahydro-1H-pyrrolo[1,2-c]imidazolidin-2-yl}phenyl)methanesulfonamide	C13H11Cl2F2N3O4S	C013H011Cl002F002N003O004S001	C013H011Cl002F002N003O004S001	13	11	11	0	0	2	2	0	3	0	4	0	1	414.212	36	19	6	0.24	3	5	0	83.99	-1	0.91	0.91	0.91	0.91	0.88	0.69	0.24	0.01	-0.03	-0.05	-0.2	-0.78	-1.68	-3.46
profluralin	Unknown mode of action			26399-36-0	png	svg	CCCN(CC1CC1)C1=C(C=C(C=C1[N+]([O-])=O)C(F)(F)F)[N+]([O-])=O	N-(cyclopropylmethyl)-2,6-dinitro-N-propyl-4-(trifluoromethyl)aniline	C14H16F3N3O4	C014H016F003N003O004	C014H016F003N003O004	14	16	16	0	0	0	3	0	3	0	4	0	0	347.29	40	18	6	0.25	8	5	0	94.88	0	4.5	4.5	4.5	4.5	4.5	4.5	4.5	4.5	4.5	4.5	4.5	4.5	4.5		-6.54
profoxydim	Inhibitor of ACCase			139001-49-3	png	svg	CCCC(NOCC(C)OC1=CC=C(Cl)C=C1)=C1C(=O)CC(CC1=O)C1CCCSC1	2-(1-{[2-(4-chlorophenoxy)propoxy]amino}butylidene)-5-(thian-3-yl)cyclohexane-1,3-dione	C24H32ClNO4S	C024H032Cl001N001O004S001	C024H032Cl001N001O004S001	24	32	32	0	0	1	0	0	1	0	4	0	1	466.033	63	25	6	0.193548	9	5	1	64.63	0	5.4	5.4	5.4	5.4	5.4	5.4	5.4	5.4	5.4	5.4	5.4	5.4	5.4	-5.47
prometon	Inhibitor of photosynthesis			1610-18-0	png	svg	COC1=NC(NC(C)C)=NC(NC(C)C)=N1	6-methoxy-2-N,4-N-bis(propan-2-yl)-1,3,5-triazine-2,4-diamine	C10H19N5O	C010H019N005O001	C010H019N005O001	10	19	19	0	0	0	0	0	5	0	1	0	0	225.291	35	10	6	0.375	5	6	2	71.96	0	0.27	0.36	0.79	1.57	2.09	2.21	2.23	2.23	2.23	2.23	2.23	2.22	2.17	-3.69
prometryne	Inhibitor of photosynthesis	Y	Y	7287-19-6	png	svg	CSC1=NC(NC(C)C)=NC(NC(C)C)=N1	6-(methylsulfanyl)-2-N,4-N-bis(propan-2-yl)-1,3,5-triazine-2,4-diamine	C10H19N5S	C010H019N005S001	C010H019N005S001	10	19	19	0	0	0	0	0	5	0	0	0	1	241.356	35	10	6	0.375	5	5	2	62.73	0	1.05	1.05	1.21	1.77	2.54	2.93	3	3.01	3.01	3.01	3.01	3.01	2.98		-4.1
propachlor	Inhibitor of cell division	Y	Y	1918-16-7	png	svg	CC(C)N(C(=O)CCl)C1=CC=CC=C1	2-chloro-N-phenyl-N-(propan-2-yl)acetamide	C11H14ClNO	C011H014Cl001N001O001	C011H014Cl001N001O001	11	14	14	0	0	1	0	0	1	0	1	0	0	211.688	28	8	6	0.428571	3	1	0	20.31	0	2.39	2.39	2.39	2.39	2.39	2.39	2.39	2.39	2.39	2.39	2.39	2.39	2.39		-2.48
propanil	Inhibitor of photosynthesis		Y	709-98-8	png	svg	CCC(=O)NC1=CC(Cl)=C(Cl)C=C1	N-(3,4-dichlorophenyl)propanamide	C9H9Cl2NO	C009H009Cl002N001O001	C009H009Cl002N001O001	9	9	9	0	0	2	0	0	1	0	1	0	0	218.08	22	7	6	0.461538	2	1	1	29.1	0	3.12	3.12	3.12	3.12	3.12	3.12	3.12	3.12	3.12	3.12	3.12	3.11	3.01		-3
propaquizafop	Inhibitor of ACCase		Y	111479-05-1	png	svg	CC(OC1=CC=C(OC2=NC3=CC=C(Cl)C=C3N=C2)C=C1)C(=O)OCCON=C(C)C	2-{[(propan-2-ylidene)amino]oxy}ethyl 2-{4-[(6-chloroquinoxalin-2-yl)oxy]phenoxy}propanoate	C22H22ClN3O5	C022H022Cl001N003O005	C022H022Cl001N003O005	22	22	22	0	0	1	0	0	3	0	5	0	0	443.88	53	15	16	0.516129	10	6	0	92.13	0	2.84	3.74	4.24	4.34	4.35	4.36	4.36	4.36	4.36	4.36	4.36	4.36	4.36	-5.15
propazine	Inhibitor of photosynthesis	Y	Y	139-40-2	png	svg	CC(C)NC1=NC(NC(C)C)=NC(Cl)=N1	6-chloro-2-N,4-N-bis(propan-2-yl)-1,3,5-triazine-2,4-diamine	C9H16ClN5	C009H016Cl001N005	C009H016Cl001N005	9	16	16	0	0	1	0	0	5	0	0	0	0	229.71	31	9	6	0.4	4	5	2	62.73	0	1.05	1.8	2.41	2.59	2.61	2.61	2.61	2.61	2.61	2.61	2.61	2.61	2.57		-4.43
propham	Inhibitor of microtubule organisation	Y	Y	122-42-9	png	svg	CC(C)OC(=O)NC1=CC=CC=C1	propan-2-yl N-phenylcarbamate	C10H13NO2	C010H013N001O002	C010H013N001O002	10	13	13	0	0	0	0	0	1	0	2	0	0	179.216	26	7	6	0.461538	3	2	1	38.33	0	2.6	2.6	2.6	2.6	2.6	2.6	2.6	2.6	2.6	2.6	2.58	2.45	1.91	-1.97
propisochlor	Inhibitor of cell division	Y		86763-47-5	png	svg	CCC1=C(N(COC(C)C)C(=O)CCl)C(C)=CC=C1	2-chloro-N-(2-ethyl-6-methylphenyl)-N-[(propan-2-yloxy)methyl]acetamide	C15H22ClNO2	C015H022Cl001N001O002	C015H022Cl001N001O002	15	22	22	0	0	1	0	0	1	0	2	0	0	283.794	41	13	6	0.315789	6	2	0	29.54	0	3.92	3.92	3.92	3.92	3.92	3.92	3.92	3.92	3.92	3.92	3.92	3.92	3.92	-3.4
propoxycarbazone-sodium	Inhibitor of ALS		Y	181274-15-7	png	svg	[Na+].CCCOC1=NN(C(=O)N=S([O-])(=O)C2=C(C=CC=C2)C(=O)OC)C(=O)N1C	sodium {[2-(methoxycarbonyl)phenyl][(4-methyl-5-oxo-3-propoxy-4,5-dihydro-1H-1,2,4-triazole-1-carbonyl)imino]oxo-λ⁶-sulfanyl}olate	C15H17N4NaO7S	C015H017N004Na001O007S001	C015H017N004O007S001	15	17	17	0	0	0	0	0	4	1	7	0	1	397.384	44	16	11	0.407407	6	8	0	141	-1	2.02	1.99	1.77	1.31	1.11	1.08	1.08	1.08	1.08	1.08	1.08	1.08	1.08	-3.99
propyrisulfuron	Unknown mode of action			570415-88-2	png	svg	CCCC1=NN2C(C=C1)=NC(Cl)=C2S(=O)(=O)NC(=O)NC1=NC(OC)=CC(OC)=N1	3-({2-chloro-6-propylimidazo[1,2-b]pyridazin-3-yl}sulfonyl)-1-(4,6-dimethoxypyrimidin-2-yl)urea	C16H18ClN7O5S	C016H018Cl001N007O005S001	C016H018Cl001N007O005S001	16	18	18	0	0	1	0	0	7	0	5	0	1	455.876	48	15	15	0.5	6	10	1	146.9	-1	2.52	2.9	2.96	2.89	2.53	2.14	2.04	2.03	2.03	2.03	2.03	2.03	2.02	-4.29
propyzamide	Inhibitor of microtubule assembly	Y	Y	23950-58-5	png	svg	CC(C)(NC(=O)C1=CC(Cl)=CC(Cl)=C1)C#C	3,5-dichloro-N-(2-methylbut-3-yn-2-yl)benzamide	C12H11Cl2NO	C012H011Cl002N001O001	C012H011Cl002N001O001	12	11	11	0	0	2	0	0	1	0	1	0	0	256.128	27	10	6	0.375	2	1	1	29.1	0	3.18	3.18	3.18	3.18	3.18	3.18	3.18	3.18	3.18	3.18	3.18	3.17	3.13	-4.45
prosulfocarb	Inhibitor of lipid synthesis	Y	Y	52888-80-9	png	svg	CCCN(CCC)C(=O)SCC1=CC=CC=C1	N,N-dipropyl(benzylsulfanyl)formamide	C14H21NOS	C014H021N001O001S001	C014H021N001O001S001	14	21	21	0	0	0	0	0	1	0	1	0	1	251.388	38	11	6	0.352941	7	1	0	20.31	0	4.17	4.17	4.17	4.17	4.17	4.17	4.17	4.17	4.17	4.17	4.17	4.17	4.17	-4.16
prosulfuron	Inhibitor of ALS		Y	94125-34-5	png	svg	COC1=NC(NC(=O)NS(=O)(=O)C2=CC=CC=C2CCC(F)(F)F)=NC(C)=N1	3-(4-methoxy-6-methyl-1,3,5-triazin-2-yl)-1-[2-(3,3,3-trifluoropropyl)benzenesulfonyl]urea	C15H16F3N5O4S	C015H016F003N005O004S001	C015H016F003N005O004S001	15	16	16	0	0	0	3	0	5	0	4	0	1	419.379	44	16	12	0.428571	6	8	1	120.37	-1	3.46	3.46	3.27	2.77	2.48	2.44	2.43	2.43	2.43	2.43	2.43	2.43	2.42	-3.63
pyraclonil	Inhibitor of protoporphyrinogen oxidase			158353-15-2	png	svg	CN(CC#C)C1=C(C=NN1C1=NN2CCCCC2=C1Cl)C#N	1-{3-chloro-4H,5H,6H,7H-pyrazolo[1,5-a]pyridin-2-yl}-5-[methyl(prop-2-yn-1-yl)amino]-1H-pyrazole-4-carbonitrile	C15H15ClN6	C015H015Cl001N006	C015H015Cl001N006	15	15	15	0	0	1	0	0	6	0	0	0	0	314.773	37	12	10	0.454545	3	4	0	62.67	0	1.85	2.49	2.64	2.66	2.66	2.66	2.66	2.66	2.66	2.66	2.66	2.66	2.66	-3.5
pyraflufen-ethyl	Inhibitor of protoporphyrinogen oxidase		Y	129630-19-9	png	svg	CCOC(=O)COC1=C(Cl)C=C(F)C(=C1)C1=NN(C)C(OC(F)F)=C1Cl	ethyl 2-{2-chloro-5-[4-chloro-5-(difluoromethoxy)-1-methyl-1H-pyrazol-3-yl]-4-fluorophenoxy}acetate	C15H13Cl2F3N2O4	C015H013Cl002F003N002O004	C015H013Cl002F003N002O004	15	13	13	0	0	2	3	0	2	0	4	0	0	413.176	39	15	11	0.423077	8	4	0	62.58	0	4.39	4.46	4.47	4.47	4.47	4.47	4.47	4.47	4.47	4.47	4.47	4.47	4.47	-4.81
pyrasulfotole	Inhibitor of pigment synthesis		Y	365400-11-9	png	svg	CN1NC(C)=C(C(=O)C2=C(C=C(C=C2)C(F)(F)F)S(C)(=O)=O)C1=O	4-[2-methanesulfonyl-4-(trifluoromethyl)benzoyl]-2,5-dimethyl-2,3-dihydro-1H-pyrazol-3-one	C14H13F3N2O4S	C014H013F003N002O004S001	C014H013F003N002O004S001	14	13	13	0	0	0	3	0	2	0	4	0	1	362.324	37	13	11	0.458333	4	5	0	80.75	-1	0.68	0.68	0.65	0.44	-0.12	-0.47	-0.54	-0.55	-0.55	-0.55	-0.55	-0.55	-0.55	-3.37
pyrazolynate	Inhibitor of pigment synthesis			58011-68-0	png	svg	CN1N=C(C)C(C(=O)C2=CC=C(Cl)C=C2Cl)=C1OS(=O)(=O)C1=CC=C(C)C=C1	4-(2,4-dichlorobenzoyl)-1,3-dimethyl-1H-pyrazol-5-yl 4-methylbenzene-1-sulfonate	C19H16Cl2N2O4S	C019H016Cl002N002O004S001	C019H016Cl002N002O004S001	19	16	16	0	0	2	0	0	2	0	4	0	1	439.312	44	11	17	0.607143	5	4	0	78.26	0	4.68	4.97	5.01	5.02	5.02	5.02	5.02	5.02	5.02	5.02	5.02	5.02	5.02	-5.02
pyrazon	Inhibitor of photosynthesis	Y	Y	1698-60-8	png	svg	NC1=C(Cl)C(=O)N(N=C1)C1=CC=CC=C1	5-amino-4-chloro-2-phenyl-2,3-dihydropyridazin-3-one	C10H8ClN3O	C010H008Cl001N003O001	C010H008Cl001N003O001	10	8	8	0	0	1	0	0	3	0	1	0	0	221.643	23	3	12	0.8	1	3	2	58.69	0	1.11	1.11	1.11	1.11	1.11	1.11	1.11	1.11	1.11	1.11	1.11	1.11	1.11		-2.87
pyrazosulfuron-ethyl	Inhibitor of ALS	Y	Y	93697-74-6	png	svg	CCOC(=O)C1=C(N(C)N=C1)S(=O)(=O)NC(=O)NC1=NC(OC)=CC(OC)=N1	ethyl 5-({[(4,6-dimethoxypyrimidin-2-yl)carbamoyl]amino}sulfonyl)-1-methyl-1H-pyrazole-4-carboxylate	C14H18N6O7S	C014H018N006O007S001	C014H018N006O007S001	14	18	18	0	0	0	0	0	6	0	7	0	1	414.394	46	17	11	0.392857	7	10	1	160.83	-1	0.52	0.91	0.97	0.9	0.56	0.16	0.05	0.04	0.04	0.04	0.04	0.04	0.03	-2.91
pyrazoxyfen	Inhibitor of pigment synthesis	Y	Y	71561-11-0	png	svg	CN1N=C(C)C(C(=O)C2=CC=C(Cl)C=C2Cl)=C1OCC(=O)C1=CC=CC=C1	2-{[4-(2,4-dichlorobenzoyl)-1,3-dimethyl-1H-pyrazol-5-yl]oxy}-1-phenylethan-1-one	C20H16Cl2N2O3	C020H016Cl002N002O003	C020H016Cl002N002O003	20	16	16	0	0	2	0	0	2	0	3	0	0	403.259	43	10	17	0.62963	6	4	0	61.19	0	3.46	4.13	4.33	4.36	4.36	4.36	4.36	4.36	4.36	4.36	4.36	4.36	4.36	-5.61
pyribenzoxim	Inhibitor of ALS		Y	168088-61-7	png	svg	COC1=CC(OC)=NC(OC2=CC=CC(OC3=NC(OC)=CC(OC)=N3)=C2C(=O)ON=C(C2=CC=CC=C2)C2=CC=CC=C2)=N1	(diphenylmethylidene)amino 2,6-bis[(4,6-dimethoxypyrimidin-2-yl)oxy]benzoate	C32H27N5O8	C032H027N005O008	C032H027N005O008	32	27	27	0	0	0	0	0	5	0	8	0	0	609.586	72	15	30	0.666667	13	11	0	145.6	0	7.78	7.88	7.9	7.9	7.9	7.9	7.9	7.9	7.9	7.9	7.9	7.9	7.9	-5.37
pyributicarb	Unknown mode of action	Y	Y	88678-67-5	png	svg	COC1=CC=CC(=N1)N(C)C(=S)OC1=CC=CC(=C1)C(C)(C)C	1-3-tert-butylphenoxy-N-(6-methoxypyridin-2-yl)-N-methylmethanethioamide	C18H22N2O2S	C018H022N002O002S001	C018H022N002O002S001	18	22	22	0	0	0	0	0	2	0	2	0	1	330.444	45	11	12	0.521739	5	3	0	34.59	0	5.55	5.6	5.6	5.6	5.6	5.6	5.6	5.6	5.6	5.6	5.6	5.6	5.6	-5.08
pyridafol	Inhibitor of photosynthesis			40020-01-7	png	svg	ClC1=CC(=O)C(=NN1)C1=CC=CC=C1	6-chloro-3-phenyl-1,4-dihydropyridazin-4-one	C10H7ClN2O	C010H007Cl001N002O001	C010H007Cl001N002O001	10	7	7	0	0	1	0	0	2	0	1	0	0	206.628	21	2	12	0.857143	1	3	0	38.66	-1	2.49	2.43	2.1	1.54	1.31	1.27	1.27	1.27	1.27	1.27	1.27	1.27	1.27	-2.85
pyridate	Inhibitor of photosynthesis		Y	55512-33-9	png	svg	CCCCCCCCSC(=O)OC1=CC(Cl)=NN=C1C1=CC=CC=C1	[(6-chloro-3-phenylpyridazin-4-yl)oxy](octylsulfanyl)methanone	C19H23ClN2O2S	C019H023Cl001N002O002S001	C019H023Cl001N002O002S001	19	23	23	0	0	1	0	0	2	0	2	0	1	378.916	48	13	12	0.48	11	3	0	52.08	0	6.58	6.61	6.61	6.61	6.61	6.61	6.61	6.61	6.61	6.61	6.61	6.61	6.61	-5.99
pyriftalid	Inhibitor of ALS			135186-78-6	png	svg	COC1=CC(OC)=NC(SC2=CC=CC3=C2C(=O)OC3C)=N1	7-[(4,6-dimethoxypyrimidin-2-yl)sulfanyl]-3-methyl-1,3-dihydro-2-benzofuran-1-one	C15H14N2O4S	C015H014N002O004S001	C015H014N002O004S001	15	14	14	0	0	0	0	0	2	0	4	0	1	318.348	36	10	12	0.545455	4	5	0	70.54	0	3.68	3.75	3.76	3.76	3.76	3.76	3.76	3.76	3.76	3.76	3.76	3.76	3.76	-3.71
pyriminobac-methyl	Inhibitor of ALS		Y	147411-69-6	png	svg	CO\N=C(/C)C1=CC=CC(OC2=NC(OC)=CC(OC)=N2)=C1C(=O)OC	methyl 2-[(4,6-dimethoxypyrimidin-2-yl)oxy]-6-[(1E)-1-(methoxyimino)ethyl]benzoate	C17H19N3O6	C017H019N003O006	C017H019N003O006	17	19	19	0	0	0	0	0	3	0	6	0	0	361.349	45	14	12	0.461538	8	7	0	101.36	0	2.7	3	3.05	3.05	3.05	3.05	3.05	3.05	3.05	3.05	3.05	3.05	3.05	-3.69
pyrimisulfan	Unknown mode of action			221205-90-9	png	svg	COCC1=C(NS(=O)(=O)C(F)F)C(=CC=C1)C(O)C1=NC(OC)=CC(OC)=N1	N-{2-[(4,6-dimethoxypyrimidin-2-yl)(hydroxy)methyl]-6-(methoxymethyl)phenyl}-1,1-difluoromethanesulfonamide	C16H19F2N3O6S	C016H019F002N003O006S001	C016H019F002N003O006S001	16	19	19	0	0	0	2	0	3	0	6	0	1	419.4	47	16	12	0.428571	8	9	1	117.07	-1	1.82	2.19	2.22	1.99	1.49	1.24	1.2	1.2	1.2	1.17	0.98	0.04	-1.7	-3.07
pyrithiobac	Inhibitor of ALS	Y	Y	123342-93-8	png	svg	COC1=CC(OC)=NC(SC2=C(C(O)=O)C(Cl)=CC=C2)=N1	2-chloro-6-[(4,6-dimethoxypyrimidin-2-yl)sulfanyl]benzoic acid	C13H11ClN2O4S	C013H011Cl001N002O004S001	C013H011Cl001N002O004S001	13	11	11	0	0	1	0	0	2	0	4	0	1	326.755	32	9	12	0.571429	5	6	0	84.37	-1	3.9	3.63	2.82	1.86	0.52	0.52	0.52	0.52	0.52	0.52	0.52	0.52	0.52	-3.91
pyroxasulfone	Unknown mode of action	Y		447399-55-5	png	svg	CN1N=C(C(CS(=O)(=O)C2=NOC(C)(C)C2)=C1OC(F)F)C(F)(F)F	3-{[5-(difluoromethoxy)-1-methyl-3-(trifluoromethyl)-1H-pyrazol-4-yl]methanesulfonyl}-5,5-dimethyl-4,5-dihydro-1,2-oxazole	C12H14F5N3O4S	C012H014F005N003O004S001	C012H014F005N003O004S001	12	14	14	0	0	0	5	0	3	0	4	0	1	391.314	39	20	5	0.2	6	6	0	82.78	0	2.36	2.37	2.37	2.37	2.37	2.37	2.37	2.37	2.37	2.37	2.37	2.37	2.37	-3.54
pyroxsulam	Inhibitor of ALS		Y	422556-08-9	png	svg	COC1=NC2=NC(NS(=O)(=O)C3=C(C=CN=C3OC)C(F)(F)F)=NN2C(OC)=C1	N-{5,7-dimethoxy-[1,2,4]triazolo[1,5-a]pyrimidin-2-yl}-2-methoxy-4-(trifluoromethyl)pyridine-3-sulfonamide	C14H13F3N6O5S	C014H013F003N006O005S001	C014H013F003N006O005S001	14	13	13	0	0	0	3	0	6	0	5	0	1	434.35	42	14	15	0.517241	6	10	0	127.03	-1	1.84	1.84	1.84	1.84	1.81	1.62	1.16	0.94	0.91	0.9	0.9	0.9	0.9	-3.38
quinclorac	Synthetic auxin	Y	Y	84087-01-4	png	svg	OC(=O)C1=C(Cl)C=CC2=CC(Cl)=CN=C12	3,7-dichloroquinoline-8-carboxylic acid	C10H5Cl2NO2	C010H005Cl002N001O002	C010H005Cl002N001O002	10	5	5	0	0	2	0	0	1	0	2	0	0	242.058	20	5	10	0.666667	1	3	0	53.02	-1	2.54	2.27	1.52	0.58	-0.53	-0.53	-0.53	-0.53	-0.53	-0.53	-0.53	-0.53	-0.53	-3.51
quinmerac	Synthetic auxin		Y	90717-03-6	png	svg	CC1=CC2=C(N=C1)C(C(O)=O)=C(Cl)C=C2	7-chloro-3-methylquinoline-8-carboxylic acid	C11H8ClNO2	C011H008Cl001N001O002	C011H008Cl001N001O002	11	8	8	0	0	1	0	0	1	0	2	0	0	221.64	23	5	10	0.666667	1	3	0	53.02	-1	1.5	1.48	1.37	0.86	-0.08	-0.52	-0.62	-0.62	-0.62	-0.62	-0.62	-0.62	-0.62	-3.21
quinoclamine	Unknown mode of action			2797-51-5	png	svg	NC1=C(Cl)C(=O)C2=C(C=CC=C2)C1=O	2-amino-3-chloro-1,4-dihydronaphthalene-1,4-dione	C10H6ClNO2	C010H006Cl001N001O002	C010H006Cl001N001O002	10	6	6	0	0	1	0	0	1	0	2	0	0	207.613	20	8	6	0.428571	0	3	2	60.16	0	0.73	0.73	0.73	0.73	0.73	0.73	0.73	0.73	0.73	0.73	0.73	0.73	0.73	-2.88
quizalofop	Inhibitor of ACCase		Y	76578-12-6	png	svg	CC(OC1=CC=C(OC2=NC3=C(C=C(Cl)C=C3)N=C2)C=C1)C(O)=O	2-{4-[(6-chloroquinoxalin-2-yl)oxy]phenoxy}propanoic acid	C17H13ClN2O4	C017H013Cl001N002O004	C017H013Cl001N002O004	17	13	13	0	0	1	0	0	2	0	4	0	0	344.749	37	8	16	0.666667	5	5	0	84.37	-1	3.85	3.74	3.18	2.27	1.33	0.36	0.36	0.36	0.36	0.36	0.36	0.36	0.36	-4.24
quizalofop-P-ethyl	Inhibitor of ACCase		Y	100646-51-3	png	svg	CCOC(=O)[C@@H](C)OC1=CC=C(OC2=NC3=C(C=C(Cl)C=C3)N=C2)C=C1	ethyl (2R)-2-{4-[(6-chloroquinoxalin-2-yl)oxy]phenoxy}propanoate	C19H17ClN2O4	C019H017Cl001N002O004	C019H017Cl001N002O004	19	17	17	0	0	1	0	0	2	0	4	0	0	372.802	43	10	16	0.615385	7	4	0	70.54	0	4.37	4.39	4.39	4.39	4.39	4.39	4.39	4.39	4.39	4.39	4.39	4.39	4.39	-4.6
quizalofop-P-tefuryl	Inhibitor of ACCase			200509-41-7	png	svg	CC(OC1=CC=C(OC2=CN=C3C=C(Cl)C=CC3=N2)C=C1)C(=O)OCC1CCCO1	oxolan-2-ylmethyl 2-{4-[(6-chloroquinoxalin-2-yl)oxy]phenoxy}propanoate	C22H21ClN2O5	C022H021Cl001N002O005	C022H021Cl001N002O005	22	21	21	0	0	1	0	0	2	0	5	0	0	428.866	51	14	16	0.533333	8	5	0	79.77	0	4.43	4.45	4.45	4.45	4.45	4.45	4.45	4.45	4.45	4.45	4.45	4.45	4.45	-4.8
rimsulfuron	Inhibitor of ALS		Y	122931-48-0	png	svg	CCS(=O)(=O)C1=C(N=CC=C1)S(=O)(=O)NC(=O)NC1=NC(OC)=CC(OC)=N1	1-(4,6-dimethoxypyrimidin-2-yl)-3-{[3-(ethanesulfonyl)pyridin-2-yl]sulfonyl}urea	C14H17N5O7S2	C014H017N005O007S002	C014H017N005O007S002	14	17	17	0	0	0	0	0	5	0	7	0	2	431.444	45	16	12	0.428571	6	11	1	163.74	-1	0.37	0.75	0.81	0.74	0.37	-0.01	-0.1	-0.11	-0.11	-0.11	-0.11	-0.11	-0.12	-3.91
saflufenacil	Inhibitor of protoporphyrinogen oxidase			372137-35-4	png	svg	CC(C)N(C)S(=O)(=O)NC(=O)C1=CC(N2C(=O)C=C(N(C)C2=O)C(F)(F)F)=C(F)C=C1Cl	2-chloro-4-fluoro-N-[methyl(propan-2-yl)sulfamoyl]-5-[3-methyl-2,6-dioxo-4-(trifluoromethyl)-1,2,3,6-tetrahydropyrimidin-1-yl]benzamide	C17H17ClF4N4O5S	C017H017Cl001F004N004O005S001	C017H017Cl001F004N004O005S001	17	17	17	0	0	1	4	0	4	0	5	0	1	500.852	49	20	12	0.375	3	6	0	104.3	-1	1.89	1.89	1.83	1.51	1.09	0.97	0.95	0.95	0.95	0.95	0.95	0.95	0.95	-5.64
sethoxydim	Inhibitor of ACCase			74051-80-2	png	svg	CCCC(NOCC)=C1C(=O)CC(CC(C)SCC)CC1=O	2-[1-(ethoxyamino)butylidene]-5-[2-(ethylsulfanyl)propyl]cyclohexane-1,3-dione	C17H29NO3S	C017H029N001O003S001	C017H029N001O003S001	17	29	29	0	0	0	0	0	1	0	3	0	1	327.482	51	22	0	0	9	4	1	55.4	0	3.42	3.43	3.43	3.43	3.43	3.43	3.43	3.43	3.43	3.43	3.43	3.43	3.43	-3.72
siduron	Inhibitor of photosynthesis	Y		1982-49-6	png	svg	CC1CCCCC1NC(=O)NC1=CC=CC=C1	3-(2-methylcyclohexyl)-1-phenylurea	C14H20N2O	C014H020N002O001	C014H020N002O001	14	20	20	0	0	0	0	0	2	0	1	0	0	232.321	37	11	6	0.352941	2	1	2	41.13	0	3.27	3.27	3.27	3.27	3.27	3.27	3.27	3.27	3.27	3.27	3.26	3.24	3.05		-4.11
simazine	Inhibitor of photosynthesis			122-34-9	png	svg	CCNC1=NC(NCC)=NC(Cl)=N1	6-chloro-2-N,4-N-diethyl-1,3,5-triazine-2,4-diamine	C7H12ClN5	C007H012Cl001N005	C007H012Cl001N005	7	12	12	0	0	1	0	0	5	0	0	0	0	201.657	25	7	6	0.461538	4	5	2	62.73	0	0.18	0.92	1.56	1.75	1.78	1.78	1.78	1.78	1.78	1.78	1.78	1.78	1.76		-4.55
simetryne	Inhibitor of photosynthesis			1014-70-6	png	svg	CCNC1=NC(SC)=NC(NCC)=N1	2-N,4-N-diethyl-6-(methylsulfanyl)-1,3,5-triazine-2,4-diamine	C8H15N5S	C008H015N005S001	C008H015N005S001	8	15	15	0	0	0	0	0	5	0	0	0	1	213.303	29	8	6	0.428571	5	5	2	62.73	0	0.21	0.22	0.36	0.89	1.67	2.09	2.17	2.18	2.18	2.18	2.18	2.18	2.17	-3.11
S-metolachlor	Inhibitor of cell division	Y	Y	87392-12-9	png	svg	CCC1=CC=CC(C)=C1N(C(C)COC)C(=O)CCl	2-chloro-N-(2-ethyl-6-methylphenyl)-N-(1-methoxypropan-2-yl)acetamide	C15H22ClNO2	C015H022Cl001N001O002	C015H022Cl001N001O002	15	22	22	0	0	1	0	0	1	0	2	0	0	283.794	41	13	6	0.315789	6	2	0	29.54	0	3.45	3.45	3.45	3.45	3.45	3.45	3.45	3.45	3.45	3.45	3.45	3.45	3.45	-3.43
sulcotrione	Inhibitor of pigment synthesis		Y	99105-77-8	png	svg	CS(=O)(=O)C1=CC=C(C(=O)C2C(=O)CCCC2=O)C(Cl)=C1	2-(2-chloro-4-methanesulfonylbenzoyl)cyclohexane-1,3-dione	C14H13ClO5S	C014H013Cl001O005S001	C014H013Cl001O005S001	14	13	13	0	0	1	0	0	0	0	5	0	1	328.768	34	15	6	0.285714	3	5	0	85.35	-1	1.57	1.56	1.53	1.29	0.58	-0.25	-0.68	-0.78	-0.78	-0.78	-0.78	-0.78	-0.78	-3.83
sulfentrazone	Inhibitor of protoporphyrinogen oxidase	Y		122836-35-5	png	svg	CC1=NN(C(=O)N1C(F)F)C1=CC(NS(C)(=O)=O)=C(Cl)C=C1Cl	N-{2,4-dichloro-5-[4-(difluoromethyl)-3-methyl-5-oxo-4,5-dihydro-1H-1,2,4-triazol-1-yl]phenyl}methanesulfonamide	C11H10Cl2F2N4O3S	C011H010Cl002F002N004O003S001	C011H010Cl002F002N004O003S001	11	10	10	0	0	2	2	0	4	0	3	0	1	387.19	33	12	11	0.478261	3	5	0	79.28	-1	2.05	2.05	2.05	2.05	2.05	2.01	1.77	1.31	1.14	1.11	1.11	1.11	1.11	-4.59
sulfometuron-methyl	Inhibitor of ALS	Y	Y	74222-97-2	png	svg	COC(=O)C1=CC=CC=C1S(=O)(=O)NC(=O)NC1=NC(C)=CC(C)=N1	methyl 2-({[(4,6-dimethylpyrimidin-2-yl)carbamoyl]amino}sulfonyl)benzoate	C15H16N4O5S	C015H016N004O005S001	C015H016N004O005S001	15	16	16	0	0	0	0	0	4	0	5	0	1	364.376	41	13	12	0.48	4	7	1	124.55	-1	0.52	1.18	1.22	0.8	0.59	0.56	0.55	0.55	0.55	0.55	0.55	0.55	0.55	-4.68
sulfosate	Inhibitor of EPSP synthase			81591-81-3	png	svg	C[S+](C)C.OP(O)(=O)CNCC([O-])=O	trimethylsulfanium 2-[(phosphonomethyl)amino]acetate	C6H16NO5PS	C006H016N001O005P001S001	C003H007N001O005P001	6	16	7	0	0	0	0	0	1	0	5	1	1	168.066	17	10	0	0	4	5	3	117.1	-1	-3.1	-3.19	-3.67	-4.55	-5.5	-6.55	-7.6	-8.09	-8.86	-9.62	-10.01	-10.01	-10.01	-1.27
sulfosulfuron	Inhibitor of ALS			141776-32-1	png	svg	CCS(=O)(=O)C1=C(N2C=CC=CC2=N1)S(=O)(=O)NC(=O)NC1=NC(OC)=CC(OC)=N1	1-(4,6-dimethoxypyrimidin-2-yl)-3-{[2-(ethanesulfonyl)imidazo[1,2-a]pyridin-3-yl]sulfonyl}urea	C16H18N6O7S2	C016H018N006O007S002	C016H018N006O007S002	16	18	18	0	0	0	0	0	6	0	7	0	2	470.48	49	16	15	0.483871	6	11	1	168.15	-1	0.47	0.85	0.91	0.84	0.49	0.1	-0.01	-0.02	-0.02	-0.02	-0.02	-0.02	-0.03	-4.22
TCA	Inhibitor of lipid synthesis	Y		76-03-9	png	svg	OC(=O)C(Cl)(Cl)Cl	trichloroacetic acid	C2HCl3O2	C002H001Cl003O002	C002H001Cl003O002	2	1	1	0	0	3	0	0	0	0	2	0	0	163.387	8	7	0	0	1	2	0	40.13	-1	1.36	0.76	-0.16	-1.1	-2	-2	-2	-2	-2	-2	-2	-2	-2	-1.89
TCBA	Synthetic auxin		Y	50-31-7	png	svg	OC(=O)C1=C(Cl)C(Cl)=CC=C1Cl	2,3,6-trichlorobenzoic acid	C7H3Cl3O2	C007H003Cl003O002	C007H003Cl003O002	7	3	3	0	0	3	0	0	0	0	2	0	0	225.457	15	6	6	0.5	1	2	0	40.13	-1	3.32	2.83	1.94	0.98	-0.09	-0.09	-0.09	-0.09	-0.09	-0.09	-0.09	-0.09	-0.09	-3.35
tebutam	Inhibitor of microtubule assembly	Y		35256-85-0	png	svg	CC(C)N(CC1=CC=CC=C1)C(=O)C(C)(C)C	N-benzyl-2,2-dimethyl-N-(propan-2-yl)propanamide	C15H23NO	C015H023N001O001	C015H023N001O001	15	23	23	0	0	0	0	0	1	0	1	0	0	233.349	40	11	6	0.352941	4	1	0	20.31	0	3.7	3.71	3.71	3.71	3.71	3.71	3.71	3.71	3.71	3.71	3.71	3.71	3.71	-3.21
tebuthiuron	Inhibitor of photosynthesis			34014-18-1	png	svg	CNC(=O)N(C)C1=NN=C(S1)C(C)(C)C	1-(5-tert-butyl-1,3,4-thiadiazol-2-yl)-1,3-dimethylurea	C9H16N4OS	C009H016N004O001S001	C009H016N004O001S001	9	16	16	0	0	0	0	0	4	0	1	0	1	228.315	31	10	5	0.333333	2	3	1	58.12	0	1.34	1.35	1.35	1.35	1.35	1.35	1.35	1.35	1.35	1.35	1.35	1.35	1.34	-2.89
tembotrione	Inhibitor of pigment synthesis		Y	335104-84-2	png	svg	CS(=O)(=O)C1=C(COCC(F)(F)F)C(Cl)=C(C=C1)C(=O)C1C(=O)CCCC1=O	2-{2-chloro-4-methanesulfonyl-3-[(2,2,2-trifluoroethoxy)methyl]benzoyl}cyclohexane-1,3-dione	C17H16ClF3O6S	C017H016Cl001F003O006S001	C017H016Cl001F003O006S001	17	16	16	0	0	1	3	0	0	0	6	0	1	440.819	44	22	6	0.214286	7	6	0	94.58	-1	2.4	2.39	2.33	1.97	1.17	0.41	0.06	0.06	0.06	0.06	0.06	0.06	0.06	-4.09
tepraloxydim	Inhibitor of ACCase		Y	149979-41-9	png	svg	CCC(NOCC=CCl)=C1C(=O)CC(CC1=O)C1CCOCC1	2-(1-{[(3-chloroprop-2-en-1-yl)oxy]amino}propylidene)-5-(oxan-4-yl)cyclohexane-1,3-dione	C17H24ClNO4	C017H024Cl001N001O004	C017H024Cl001N001O004	17	24	24	0	0	1	0	0	1	0	4	0	0	341.83	47	23	0	0	6	5	1	64.63	0	2.37	2.38	2.38	2.38	2.38	2.38	2.38	2.38	2.38	2.38	2.38	2.38	2.38	-3.99
terbacil	Inhibitor of photosynthesis			5902-51-2	png	svg	CC1=C(Cl)C(=O)N(C(=O)N1)C(C)(C)C	3-tert-butyl-5-chloro-6-methyl-1,2,3,4-tetrahydropyrimidine-2,4-dione	C9H13ClN2O2	C009H013Cl001N002O002	C009H013Cl001N002O002	9	13	13	0	0	1	0	0	2	0	2	0	0	216.665	27	8	6	0.428571	1	2	1	49.41	0	1.29	1.29	1.29	1.29	1.29	1.29	1.28	1.24	0.98	0.26	-0.55	-1.04	-1.04		-2.48
terbucarb	Unknown mode of action			1918-11-2	png	svg	CNC(=O)OC1=C(C=C(C)C=C1C(C)(C)C)C(C)(C)C	2,6-di-tert-butyl-4-methylphenyl N-methylcarbamate	C17H27NO2	C017H027N001O002	C017H027N001O002	17	27	27	0	0	0	0	0	1	0	2	0	0	277.402	47	14	6	0.3	4	1	1	38.33	0	5.07	5.07	5.07	5.07	5.07	5.07	5.07	5.07	5.07	5.07	5.07	5.07	5.06	-4.6
terbumeton	Inhibitor of photosynthesis			33693-04-8	png	svg	CCNC1=NC(OC)=NC(NC(C)(C)C)=N1	2-N-tert-butyl-4-N-ethyl-6-methoxy-1,3,5-triazine-2,4-diamine	C10H19N5O	C010H019N005O001	C010H019N005O001	10	19	19	0	0	0	0	0	5	0	1	0	0	225.291	35	10	6	0.375	5	6	2	71.96	0	0.13	0.22	0.66	1.43	1.95	2.07	2.09	2.09	2.09	2.09	2.09	2.08	2.02	-3.78
terbuthylazine	Inhibitor of photosynthesis	Y	Y	5915-41-3	png	svg	CCNC1=NC(NC(C)(C)C)=NC(Cl)=N1	2-N-tert-butyl-6-chloro-4-N-ethyl-1,3,5-triazine-2,4-diamine	C9H16ClN5	C009H016Cl001N005	C009H016Cl001N005	9	16	16	0	0	1	0	0	5	0	0	0	0	229.71	31	9	6	0.4	4	5	2	62.73	0	0.91	1.66	2.28	2.45	2.48	2.48	2.48	2.48	2.48	2.48	2.48	2.47	2.41	-4.15
terbutryne	Inhibitor of photosynthesis	Y	Y	886-50-0	png	svg	CCNC1=NC(NC(C)(C)C)=NC(SC)=N1	2-N-tert-butyl-4-N-ethyl-6-(methylsulfanyl)-1,3,5-triazine-2,4-diamine	C10H19N5S	C010H019N005S001	C010H019N005S001	10	19	19	0	0	0	0	0	5	0	0	0	1	241.356	35	10	6	0.375	5	5	2	62.73	0	0.91	0.92	1.07	1.63	2.4	2.8	2.87	2.88	2.88	2.88	2.88	2.87	2.83		-4
thenylchlor	Inhibitor of cell division	Y		96491-05-3	png	svg	COC1=C(CN(C(=O)CCl)C2=C(C)C=CC=C2C)SC=C1	2-chloro-N-(2,6-dimethylphenyl)-N-[(3-methoxythiophen-2-yl)methyl]acetamide	C16H18ClNO2S	C016H018Cl001N001O002S001	C016H018Cl001N001O002S001	16	18	18	0	0	1	0	0	1	0	2	0	1	323.838	39	10	11	0.52381	5	2	0	29.54	0	4.12	4.12	4.12	4.12	4.12	4.12	4.12	4.12	4.12	4.12	4.12	4.12	4.12	-4.84
thiazafluron	Inhibitor of photosynthesis	Y	Y	25366-23-8	png	svg	CNC(=O)N(C)C1=NN=C(S1)C(F)(F)F	1,3-dimethyl-1-[5-(trifluoromethyl)-1,3,4-thiadiazol-2-yl]urea	C6H7F3N4OS	C006H007F003N004O001S001	C006H007F003N004O001S001	6	7	7	0	0	0	3	0	4	0	1	0	1	240.206	22	10	5	0.333333	2	3	1	58.12	0	0.68	0.68	0.68	0.68	0.68	0.68	0.68	0.68	0.68	0.68	0.68	0.68	0.68	-2.84
thiazopyr	Inhibitor of microtubule assembly	Y		117718-60-2	png	svg	COC(=O)C1=C(CC(C)C)C(C2=NCCS2)=C(N=C1C(F)F)C(F)(F)F	methyl 2-(difluoromethyl)-5-(4,5-dihydro-1,3-thiazol-2-yl)-4-(2-methylpropyl)-6-(trifluoromethyl)pyridine-3-carboxylate	C16H17F5N2O2S	C016H017F005N002O002S001	C016H017F005N002O002S001	16	17	17	0	0	0	5	0	2	0	2	0	1	396.375	43	20	6	0.230769	7	3	0	51.55	0	2.97	3.89	4.46	4.6	4.62	4.62	4.62	4.62	4.62	4.62	4.62	4.62	4.62	-4.11
thidiazimin	Inhibitor of protoporphyrinogen oxidase		Y	123249-43-4	png	svg	CC1(C)CN2C(C1)=NSC2=NC1=CC2=C(OCC(=O)N2CC#C)C=C1F	6-({6,6-dimethyl-3H,5H,6H,7H-pyrrolo[2,1-c][1,2,4]thiadiazol-3-ylidene}amino)-7-fluoro-4-(prop-2-yn-1-yl)-3,4-dihydro-2H-1,4-benzoxazin-3-one	C18H17FN4O2S	C018H017F001N004O002S001	C018H017F001N004O002S001	18	17	17	0	0	0	1	0	4	0	2	0	1	372.417	43	15	11	0.423077	2	5	0	57.5	0	2.55	2.66	2.67	2.67	2.67	2.67	2.67	2.67	2.67	2.67	2.67	2.67	2.67	-4.22
thiencarbazone	Unknown mode of action		Y	936331-72-5	png	svg	COC1=NN(C(=O)NS(=O)(=O)C2=C(C)SC=C2C(O)=O)C(=O)N1C	4-{[(3-methoxy-4-methyl-5-oxo-4,5-dihydro-1H-1,2,4-triazole-1-carbonyl)amino]sulfonyl}-5-methylthiophene-3-carboxylic acid	C11H12N4O7S2	C011H012N004O007S002	C011H012N004O007S002	11	12	12	0	0	0	0	0	4	0	7	0	2	376.366	36	14	10	0.416667	3	9	0	145.71	-2	1.22	1.18	0.91	0.11	-1.13	-3.09	-3.23	-3.25	-3.25	-3.25	-3.25	-3.25	-3.25	-3.82
thifensulfuron-methyl	Inhibitor of ALS		Y	79277-27-3	png	svg	COC(=O)C1=C(C=CS1)S(=O)(=O)NC(=O)NC1=NC(C)=NC(OC)=N1	methyl 3-({[(4-methoxy-6-methyl-1,3,5-triazin-2-yl)carbamoyl]amino}sulfonyl)thiophene-2-carboxylate	C12H13N5O6S2	C012H013N005O006S002	C012H013N005O006S002	12	13	13	0	0	0	0	0	5	0	6	0	2	387.392	38	14	11	0.44	5	9	1	146.67	-1	1.99	2.02	2.02	1.97	1.67	1.17	0.99	0.96	0.96	0.96	0.96	0.96	0.95	-3.33
tiocarbazil	Inhibitor of lipid synthesis	Y	Y	36756-79-3	png	svg	CCC(C)N(C(C)CC)C(=O)SCC1=CC=CC=C1	N,N-bis(butan-2-yl)(benzylsulfanyl)formamide	C16H25NOS	C016H025N001O001S001	C016H025N001O001S001	16	25	25	0	0	0	0	0	1	0	1	0	1	279.441	44	13	6	0.315789	7	1	0	20.31	0	5	5	5	5	5	5	5	5	5	5	5	5	5		-5.05
topramezone	Inhibitor of pigment synthesis		Y	210631-68-8	png	svg	CN1NC=C(C(=O)C2=C(C)C(C3=NOCC3)=C(C=C2)S(C)(=O)=O)C1=O	4-[3-(4,5-dihydro-1,2-oxazol-3-yl)-4-methanesulfonyl-2-methylbenzoyl]-2-methyl-2,3-dihydro-1H-pyrazol-3-one	C16H17N3O5S	C016H017N003O005S001	C016H017N003O005S001	16	17	17	0	0	0	0	0	3	0	5	0	1	363.388	42	14	11	0.44	4	7	0	102.34	-1	-1.36	-0.51	-0.11	-0.15	-0.61	-1.09	-1.21	-1.23	-1.23	-1.23	-1.23	-1.23	-1.23	-3.3
tralkoxydim	Inhibitor of ACCase		Y	87820-88-0	png	svg	CCONC(CC)=C1C(=O)CC(CC1=O)C1=C(C)C=C(C)C=C1C	2-[1-(ethoxyamino)propylidene]-5-(2,4,6-trimethylphenyl)cyclohexane-1,3-dione	C20H27NO3	C020H027N001O003	C020H027N001O003	20	27	27	0	0	0	0	0	1	0	3	0	0	329.433	51	18	6	0.25	5	4	1	55.4	0	4.33	4.48	4.49	4.5	4.5	4.5	4.5	4.5	4.5	4.5	4.5	4.5	4.5	-4.46
triafamone	Unknown mode of action			874195-61-6	png	svg	COC1=NC(=NC(OC)=N1)C(=O)C1=C(N(C)S(=O)(=O)C(F)(F)F)C(F)=CC=C1	N-[2-(dimethoxy-1,3,5-triazine-2-carbonyl)-6-fluorophenyl]-1,1,1-trifluoro-N-methylmethanesulfonamide	C14H12F4N4O5S	C014H012F004N004O005S001	C014H012F004N004O005S001	14	12	12	0	0	0	4	0	4	0	5	0	1	424.327	40	16	12	0.428571	6	8	0	111.58	0	3.78	3.78	3.78	3.78	3.78	3.78	3.78	3.78	3.78	3.78	3.78	3.78	3.78	-4.08
triallate	Inhibitor of lipid synthesis			2303-17-5	png	svg	CC(C)N(C(C)C)C(=O)SCC(Cl)=C(Cl)Cl	N,N-bis(propan-2-yl)[(2,3,3-trichloroprop-2-en-1-yl)sulfanyl]formamide	C10H16Cl3NOS	C010H016Cl003N001O001S001	C010H016Cl003N001O001S001	10	16	16	0	0	3	0	0	1	0	1	0	1	304.664	32	16	0	0	5	1	0	20.31	0	3.8	3.8	3.8	3.8	3.8	3.8	3.8	3.8	3.8	3.8	3.8	3.8	3.8		-4.88
triasulfuron	Inhibitor of ALS	Y	Y	82097-50-5	png	svg	COC1=NC(NC(=O)NS(=O)(=O)C2=C(OCCCl)C=CC=C2)=NC(C)=N1	1-[2-(2-chloroethoxy)benzenesulfonyl]-3-(4-methoxy-6-methyl-1,3,5-triazin-2-yl)urea	C14H16ClN5O5S	C014H016Cl001N005O005S001	C014H016Cl001N005O005S001	14	16	16	0	0	1	0	0	5	0	5	0	1	401.825	42	14	12	0.461538	6	9	1	129.6	-1	2.51	2.51	2.3	1.79	1.53	1.49	1.48	1.48	1.48	1.48	1.48	1.48	1.48	-4.03
triaziflam	Unknown mode of action	Y	Y	131475-57-5	png	svg	CC(COC1=CC(C)=CC(C)=C1)NC1=NC(=NC(N)=N1)C(C)(C)F	2-N-[1-(3,5-dimethylphenoxy)propan-2-yl]-6-(2-fluoropropan-2-yl)-1,3,5-triazine-2,4-diamine	C17H24FN5O	C017H024F001N005O001	C017H024F001N005O001	17	24	24	0	0	0	1	0	5	0	1	0	0	333.404	48	12	12	0.5	6	6	3	85.95	0	2.33	2.87	3.67	4.11	4.2	4.21	4.22	4.22	4.22	4.22	4.21	4.2	4.05	-4
triazofenamide	Unknown mode of action			85830-77-9	png	svg	CC1=CC(=CC=C1)N1N=C(N=C1C1=CC=CC=C1)C(N)=O	1-(3-methylphenyl)-5-phenyl-1H-1,2,4-triazole-3-carboxamide	C16H14N4O	C016H014N004O001	C016H014N004O001	16	14	14	0	0	0	0	0	4	0	1	0	0	278.309	35	4	17	0.809524	3	3	2	73.8	0	3.35	3.35	3.35	3.35	3.35	3.35	3.35	3.35	3.35	3.35	3.32	3.16	2.95	-3.75
tribenuron-methyl	Inhibitor of ALS		Y	101200-48-0	png	svg	COC(=O)C1=CC=CC=C1S(=O)(=O)NC(=O)N(C)C1=NC(C)=NC(OC)=N1	methyl 2-({[(4-methoxy-6-methyl-1,3,5-triazin-2-yl)(methyl)carbamoyl]amino}sulfonyl)benzoate	C15H17N5O6S	C015H017N005O006S001	C015H017N005O006S001	15	17	17	0	0	0	0	0	5	0	6	0	1	395.39	44	15	12	0.444444	5	9	0	137.88	-1	1.95	1.92	1.69	1.19	0.93	0.89	0.89	0.89	0.89	0.89	0.89	0.89	0.89	-4.22
triclopyr	Synthetic auxin			55335-06-3	png	svg	OC(=O)COC1=NC(Cl)=C(Cl)C=C1Cl	2-[(3,5,6-trichloropyridin-2-yl)oxy]acetic acid	C7H4Cl3NO3	C007H004Cl003N001O003	C007H004Cl003N001O003	7	4	4	0	0	3	0	0	1	0	3	0	0	256.471	18	8	6	0.428571	3	4	0	62.25	-1	2.65	2.34	1.55	0.59	-0.83	-0.83	-0.83	-0.83	-0.83	-0.83	-0.83	-0.83	-0.83	-2.74
trietazine	Inhibitor of photosynthesis			1912-26-1	png	svg	CCNC1=NC(=NC(Cl)=N1)N(CC)CC	6-chloro-2-N,2-N,4-N-triethyl-1,3,5-triazine-2,4-diamine	C9H16ClN5	C009H016Cl001N005	C009H016Cl001N005	9	16	16	0	0	1	0	0	5	0	0	0	0	229.71	31	9	6	0.4	5	5	1	53.94	0	1.28	2.05	2.61	2.75	2.77	2.77	2.77	2.77	2.77	2.77	2.77	2.77	2.76		-4.06
trifloxysulfuron	Inhibitor of ALS		Y	145099-21-4	png	svg	COC1=CC(OC)=NC(NC(=O)NS(=O)(=O)C2=C(OCC(F)(F)F)C=CC=N2)=N1	3-(4,6-dimethoxypyrimidin-2-yl)-1-{[3-(2,2,2-trifluoroethoxy)pyridin-2-yl]sulfonyl}urea	C14H14F3N5O6S	C014H014F003N005O006S001	C014H014F003N005O006S001	14	14	14	0	0	0	3	0	5	0	6	0	1	437.351	43	17	12	0.413793	7	10	1	138.83	-1	1.82	2.2	2.26	2.18	1.82	1.44	1.35	1.34	1.34	1.34	1.34	1.33	1.33	-3.48
trifluralin	Inhibitor of microtubule assembly	Y		1582-09-8	png	svg	CCCN(CCC)C1=C(C=C(C=C1[N+]([O-])=O)C(F)(F)F)[N+]([O-])=O	2,6-dinitro-N,N-dipropyl-4-(trifluoromethyl)aniline	C13H16F3N3O4	C013H016F003N003O004	C013H016F003N003O004	13	16	16	0	0	0	3	0	3	0	4	0	0	335.279	39	17	6	0.26087	8	5	0	94.88	0	4.6	4.6	4.6	4.6	4.6	4.6	4.6	4.6	4.6	4.6	4.6	4.6	4.6		-5.68
triflusulfuron-methyl	Inhibitor of ALS		Y	135990-29-3	png	svg	CN(C)C1=NC(NC(=O)NS(=O)(=O)C2=C(C=CC=C2C)C(O)=O)=NC(OCC(F)(F)F)=N1	2-[({[4-(dimethylamino)-6-(2,2,2-trifluoroethoxy)-1,3,5-triazin-2-yl]carbamoyl}amino)sulfonyl]-3-methylbenzoic acid	C16H17F3N6O6S	C016H017F003N006O006S001	C016H017F003N006O006S001	16	17	17	0	0	0	3	0	6	0	6	0	1	478.403	49	20	12	0.375	7	11	1	163.74	-2	3.15	2.97	1.98	0.31	-0.96	-1	-1	-1	-1	-1	-1	-1	-1.01	-4.08
tritosulfuron	Inhibitor of ALS		Y	142469-14-5	png	svg	COC1=NC(=NC(NC(=O)NS(=O)(=O)C2=CC=CC=C2C(F)(F)F)=N1)C(F)(F)F	3-[4-methoxy-6-(trifluoromethyl)-1,3,5-triazin-2-yl]-1-[2-(trifluoromethyl)benzenesulfonyl]urea	C13H9F6N5O4S	C013H009F006N005O004S001	C013H009F006N005O004S001	13	9	9	0	0	0	6	0	5	0	4	0	1	445.297	38	17	12	0.413793	5	8	1	120.37	-1	4	3.97	3.76	3.26	2.99	2.94	2.94	2.94	2.94	2.94	2.94	2.93	2.92	-4.02
vernolate	Inhibitor of lipid synthesis	Y		1929-77-7	png	svg	CCCSC(=O)N(CCC)CCC	N,N-dipropyl(propylsulfanyl)formamide	C10H21NOS	C010H021N001O001S001	C010H021N001O001S001	10	21	21	0	0	0	0	0	1	0	1	0	1	203.345	34	13	0	0	7	1	0	20.31	0	3.33	3.33	3.33	3.33	3.33	3.33	3.33	3.33	3.33	3.33	3.33	3.33	3.33	-2.96
[truncated: 6 more columns]

## Sheet: Histograms
Enter values into the white cells below to alter histogram appearance			Bin Range	Bin Min	Bin Max	Frequency	Cumulative
			x < 50		50	0	0	FALSE	0	0
			50 ≤ x < 125	50	125	3	3	TRUE	0	3
			125 ≤ x < 200	125	200	25	28	TRUE	0	25
No. of compounds	334		200 ≤ x < 275	200	275	101	129	TRUE	0	101
Axis decimal places (0, 1 or 2)		0	275 ≤ x < 350	275	350	88	217	TRUE	0	88
Data Range			350 ≤ x < 425	350	425	77	294	TRUE	0	77
			425 ≤ x < 500	425	500	36	330	TRUE	0	36
Round min/max to nearest…	1	0	500 ≤ x < 575	500	575	3	333	TRUE	0	3
Min. Value Natural	56.0633		575 ≤ x < 650	575	650	1	334	TRUE	0	1
Min. Value Rounded	56		650 ≤ x < 725	650	725	0	334	FALSE	0	0
Leftmost Bin Min. User-defined	50		725 ≤ x < 800	725	800	0	334	FALSE	0	0
Leftmost Bin Min. Rounded	50	50	800 ≤ x < 875	800	875	0	334	FALSE	0	0
Max. Value Natural	609.586		875 ≤ x < 950	875	950	0	334	FALSE	0	0
Max. Value Rounded	610		950 ≤ x < 1025	950	1025	0	334	FALSE	0	0
Bin Parameters			1025 ≤ x < 1100	1025	1100	0	334	FALSE	0	0
			1100 ≤ x < 1175	1100	1175	0	334	FALSE	0	0
Round Up Bin Width to nearest…	1	0	1175 ≤ x < 1250	1175	1250	0	334	FALSE	0	0
Bin Width Displayed	75	70	1250 ≤ x < 1325	1250	1325	0	334	FALSE	0	0
Bin Width User-defined	75	8	1325 ≤ x < 1400	1325	1400	0	334	FALSE	0	0
No. of Data Bins Displayed	8		1400 ≤ x < 1475	1400	1475	0	334	FALSE	0	0
No. of Data Bins User-defined			1475 ≤ x < 1550	1475	1550	0	334	FALSE	0	0
Expected No. of Bins Sturges' rule	8		1550 ≤ x	1550		0	334	FALSE	0	0							TRUE
Enter values into the white cells below to alter histogram appearance			Bin Range	Bin Min	Bin Max	Frequency	Cumulative
			x < 0.15		0.15	33	33	TRUE	33	33
DATA OUT OF RANGE!			0.15 ≤ x < 0.25	0.15	0.245	11	44	TRUE	0	11
			0.25 ≤ x < 0.34	0.245	0.34	58	102	TRUE	0	58
No. of compounds	334		0.34 ≤ x < 0.44	0.34	0.435	95	197	TRUE	0	95
Axis decimal places (2, 3 or 4)	2	2	0.44 ≤ x < 0.53	0.435	0.53	71	268	TRUE	0	71
Data Range			0.53 ≤ x < 0.63	0.53	0.625	38	306	TRUE	0	38
			0.63 ≤ x < 0.72	0.625	0.72	17	323	TRUE	0	17
Round min/max to nearest…	0.01	2	0.72 ≤ x < 0.82	0.72	0.815	6	329	TRUE	0	6
Min. Value Natural	0.00		0.82 ≤ x < 0.91	0.815	0.91	5	334	TRUE	0	5
Min. Value Rounded	0.00		0.91 ≤ x < 1.01	0.91	1.005	0	334	FALSE	0	0
Leftmost Bin Min. User-defined	0.15		1.01 ≤ x < 1.10	1.005	1.1	0	334	FALSE	0	0
Leftmost Bin Min. Rounded	0.15		1.10 ≤ x < 1.20	1.1	1.195	0	334	FALSE	0	0
Max. Value Natural	0.89		1.20 ≤ x < 1.29	1.195	1.29	0	334	FALSE	0	0
Max. Value Rounded	0.89		1.29 ≤ x < 1.39	1.29	1.385	0	334	FALSE	0	0
Bin Parameters			1.39 ≤ x < 1.48	1.385	1.48	0	334	FALSE	0	0
			1.48 ≤ x < 1.58	1.48	1.575	0	334	FALSE	0	0
Round Up Bin Width to nearest…	0.005	3	1.58 ≤ x < 1.67	1.575	1.67	0	334	FALSE	0	0
Bin Width Displayed	0.095	0.0925	1.67 ≤ x < 1.77	1.67	1.765	0	334	FALSE	0	0
Bin Width User-defined		8	1.77 ≤ x < 1.86	1.765	1.86	0	334	FALSE	0	0
No. of Data Bins Displayed	9		1.86 ≤ x < 1.96	1.86	1.955	0	334	FALSE	0	0
No. of Data Bins User-defined			1.96 ≤ x < 2.05	1.955	2.05	0	334	FALSE	0	0
Expected No. of Bins Sturges' rule	8		2.05 ≤ x	2.05		0	334	FALSE	0	0							TRUE
			2
Enter values into the white cells below to alter histogram appearance			Bin Range	Bin Min	Bin Max	Frequency	Cumulative
			x < 0		0	0	0	FALSE	0	0
			0 ≤ x < 20	0	20	7	7	TRUE	0	7
			20 ≤ x < 40	20	40	68	75	TRUE	0	68
No. of compounds	334		40 ≤ x < 60	40	60	73	148	TRUE	0	73
Axis decimal places (0, 1 or 2)		0	60 ≤ x < 80	60	80	75	223	TRUE	0	75
Data Range			80 ≤ x < 100	80	100	40	263	TRUE	0	40
			100 ≤ x < 120	100	120	22	285	TRUE	0	22
Round min/max to nearest…	1	0	120 ≤ x < 140	120	140	19	304	TRUE	0	19
Min. Value Natural	6.48		140 ≤ x < 160	140	160	19	323	TRUE	0	19
Min. Value Rounded	6		160 ≤ x < 180	160	180	10	333	TRUE	0	10
Leftmost Bin Min. User-defined	0		180 ≤ x < 200	180	200	0	333	TRUE	0	0
Leftmost Bin Min. Rounded	0	0	200 ≤ x < 220	200	220	1	334	TRUE	0	1
Max. Value Natural	203.01		220 ≤ x < 240	220	240	0	334	FALSE	0	0
Max. Value Rounded	204		240 ≤ x < 260	240	260	0	334	FALSE	0	0
Bin Parameters			260 ≤ x < 280	260	280	0	334	FALSE	0	0
			280 ≤ x < 300	280	300	0	334	FALSE	0	0
Round Up Bin Width to nearest…	1	0	300 ≤ x < 320	300	320	0	334	FALSE	0	0
Bin Width Displayed	20	18.5455	320 ≤ x < 340	320	340	0	334	FALSE	0	0
Bin Width User-defined	20	11	340 ≤ x < 360	340	360	0	334	FALSE	0	0
No. of Data Bins Displayed	11		360 ≤ x < 380	360	380	0	334	FALSE	0	0
No. of Data Bins User-defined			380 ≤ x < 400	380	400	0	334	FALSE	0	0
Expected No. of Bins Sturges' rule	8		400 ≤ x	400		0	334	FALSE	0	0							TRUE
Enter values into the white cells below to alter histogram appearance			Bin Range	Bin Min	Bin Max	Frequency	Cumulative		OOB	Unfiltered			Exp
			x < -4.50		-4.5	0	0	FALSE	0	0		0	0
			-4.50 ≤ x < -3.25	-4.5	-3.25	3	3	TRUE	0	3		2	1
			-3.25 ≤ x < -2.00	-3.25	-2	2	5	TRUE	0	2		2	0
No. of compounds	334		-2.00 ≤ x < -0.75	-2	-0.75	2	7	TRUE	0	2		1	1
Axis decimal places (0, 1 or 2)		2	-0.75 ≤ x < 0.50	-0.75	0.5	12	19	TRUE	0	12		7	5
Data Range			0.50 ≤ x < 1.75	0.5	1.75	41	60	TRUE	0	41		23	18
			1.75 ≤ x < 3.00	1.75	3	103	163	TRUE	0	103		50	53
Round min/max to nearest…	0.1	1	3.00 ≤ x < 4.25	3	4.25	111	274	TRUE	0	111		41	70
Min. Value Natural	-4		4.25 ≤ x < 5.50	4.25	5.5	57	331	TRUE	0	57		22	35
Min. Value Rounded	-4.0		5.50 ≤ x < 6.75	5.5	6.75	2	333	TRUE	0	2		2	0
Leftmost Bin Min. User-defined	-4.5		6.75 ≤ x < 8.00	6.75	8	1	334	TRUE	0	1		0	1
Leftmost Bin Min. Rounded	-4.5		8.00 ≤ x < 9.25	8	9.25	0	334	FALSE	0	0		0	0
Max. Value Natural	7.64		9.25 ≤ x < 10.50	9.25	10.5	0	334	FALSE	0	0		0	0
Max. Value Rounded	7.7		10.50 ≤ x < 11.75	10.5	11.75	0	334	FALSE	0	0		0	0
Bin Parameters			11.75 ≤ x < 13.00	11.75	13	0	334	FALSE	0	0		0	0
			13.00 ≤ x < 14.25	13	14.25	0	334	FALSE	0	0		0	0
Round Up Bin Width to nearest…	0.01	2	14.25 ≤ x < 15.50	14.25	15.5	0	334	FALSE	0	0		0	0
Bin Width Displayed	1.25	1.22	15.50 ≤ x < 16.75	15.5	16.75	0	334	FALSE	0	0		0	0
Bin Width User-defined	1.25	10	16.75 ≤ x < 18.00	16.75	18	0	334	FALSE	0	0		0	0
No. of Data Bins Displayed	10		18.00 ≤ x < 19.25	18	19.25	0	334	FALSE	0	0		0	0
No. of Data Bins User-defined			19.25 ≤ x < 20.50	19.25	20.5	0	334	FALSE	0	0		0	0
Expected No. of Bins Sturges' rule	8		20.50 ≤ x	20.5		0	334	FALSE	0	0		0	0				TRUE
Enter values into the white cells below to alter histogram appearance			Bin Range	Bin Min	Bin Max	Frequency	Cumulative
			x < -9.5		-9.5	0	0	FALSE	0	0
			-9.5 ≤ x < -8.0	-9.5	-8	1	1	TRUE	0	1
			-8.0 ≤ x < -6.5	-8	-6.5	5	6	TRUE	0	5
No. of compounds	334		-6.5 ≤ x < -5.0	-6.5	-5	1	7	TRUE	0	1
Axis decimal places (0, 1 or 2)		1	-5.0 ≤ x < -3.5	-5	-3.5	1	8	TRUE	0	1
Data Range			-3.5 ≤ x < -2.0	-3.5	-2	8	16	TRUE	0	8
			-2.0 ≤ x < -0.5	-2	-0.5	31	47	TRUE	0	31
Round min/max to nearest…	0.1	1	-0.5 ≤ x < 1.0	-0.5	1	44	91	TRUE	0	44
Min. Value Natural	-8.3		1.0 ≤ x < 2.5	1	2.5	73	164	TRUE	0	73
Min. Value Rounded	-8.3		2.5 ≤ x < 4.0	2.5	4	88	252	TRUE	0	88
Leftmost Bin Min. User-defined	-9.5		4.0 ≤ x < 5.5	4	5.5	76	328	TRUE	0	76
Leftmost Bin Min. Rounded	-9.5		5.5 ≤ x < 7.0	5.5	7	5	333	TRUE	0	5
Max. Value Natural	7.9		7.0 ≤ x < 8.5	7	8.5	1	334	TRUE	0	1
Max. Value Rounded	7.9		8.5 ≤ x < 10.0	8.5	10	0	334	FALSE	0	0
Bin Parameters			10.0 ≤ x < 11.5	10	11.5	0	334	FALSE	0	0
			11.5 ≤ x < 13.0	11.5	13	0	334	FALSE	0	0
Round Up Bin Width to nearest…	0.1	1	13.0 ≤ x < 14.5	13	14.5	0	334	FALSE	0	0
Bin Width Displayed	1.5	1.45	14.5 ≤ x < 16.0	14.5	16	0	334	FALSE	0	0
Bin Width User-defined	1.5	12	16.0 ≤ x < 17.5	16	17.5	0	334	FALSE	0	0
No. of Data Bins Displayed	12		17.5 ≤ x < 19.0	17.5	19	0	334	FALSE	0	0
No. of Data Bins User-defined			19.0 ≤ x < 20.5	19	20.5	0	334	FALSE	0	0
Expected No. of Bins Sturges' rule	8		20.5 ≤ x	20.5		0	334	FALSE	0	0							TRUE
Enter values into the white cells below to alter histogram appearance			Bin Range	Bin Min	Bin Max	Frequency	Cumulative		OOB	Unfiltered			Exp
			x < -6.90		-6.9	0	0	FALSE	0	0		0	0
			-6.90 ≤ x < -6.20	-6.9	-6.2	4	4	TRUE	0	4		2	2
			-6.20 ≤ x < -5.50	-6.2	-5.5	27	31	TRUE	0	27		23	4
No. of compounds	334		-5.50 ≤ x < -4.80	-5.5	-4.8	43	74	TRUE	0	43		37	6
Axis decimal places (0, 1 or 2)		2	-4.80 ≤ x < -4.10	-4.8	-4.1	67	141	TRUE	0	67		57	10
Data Range			-4.10 ≤ x < -3.40	-4.1	-3.4	75	216	TRUE	0	75		62	13
			-3.40 ≤ x < -2.70	-3.4	-2.7	67	283	TRUE	0	67		48	19
Round min/max to nearest…	0.1	1	-2.70 ≤ x < -2.00	-2.7	-2	24	307	TRUE	0	24		13	11
Min. Value Natural	-6.54		-2.00 ≤ x < -1.30	-2	-1.3	15	322	TRUE	0	15		11	4
Min. Value Rounded	-6.6		-1.30 ≤ x < -0.60	-1.3	-0.6	5	327	TRUE	0	5		4	1
Leftmost Bin Min. User-defined	-6.9		-0.60 ≤ x < 0.10	-0.6	0.1	3	330	TRUE	0	3		2	1
Leftmost Bin Min. Rounded	-6.9		0.10 ≤ x < 0.80	0.1	0.8	4	334	TRUE	0	4		2	2
Max. Value Natural	0.57		0.80 ≤ x < 1.50	0.8	1.5	0	334	FALSE	0	0		0	0
Max. Value Rounded	0.6		1.50 ≤ x < 2.20	1.5	2.2	0	334	FALSE	0	0		0	0
Bin Parameters			2.20 ≤ x < 2.90	2.2	2.9	0	334	FALSE	0	0		0	0
			2.90 ≤ x < 3.60	2.9	3.6	0	334	FALSE	0	0		0	0
Round Up Bin Width to nearest…	0.05	2	3.60 ≤ x < 4.30	3.6	4.3	0	334	FALSE	0	0		0	0
Bin Width Displayed	0.7	0.681818	4.30 ≤ x < 5.00	4.3	5	0	334	FALSE	0	0		0	0
Bin Width User-defined	0.7	11	5.00 ≤ x < 5.70	5	5.7	0	334	FALSE	0	0		0	0
No. of Data Bins Displayed	11		5.70 ≤ x < 6.40	5.7	6.4	0	334	FALSE	0	0		0	0
No. of Data Bins User-defined			6.40 ≤ x < 7.10	6.4	7.1	0	334	FALSE	0	0		0	0
Expected No. of Bins Sturges' rule	8		7.10 ≤ x	7.1		0	334	FALSE	0	0		0	0				TRUE
Enter values into the white cells below to alter histogram appearance			Bin Range	Bin Min	Bin Max	Frequency	Cumulative
			x ≤ -3	-3	-2	0	0	FALSE	0	0
			-2	-2	-1	4	4	TRUE	0	4
			-1	-1	0	109	113	TRUE	0	109
No. of compounds	334		0	0	1	218	331	TRUE	0	218
Axis decimal places (0, 1 or 2)	0		1	1	2	1	332	TRUE	0	1
Data Range			2	2	3	2	334	TRUE	0	2
			3	3	4	0	334	FALSE	0	0
Round min/max to nearest…	1		4	4	5	0	334	FALSE	0	0
Min. Value Natural	-2		5	5	6	0	334	FALSE	0	0
Min. Value Rounded	-2		6	6	7	0	334	FALSE	0	0
Leftmost Bin Min. User-defined			7	7	8	0	334	FALSE	0	0
Leftmost Bin Min. Rounded	-2		8	8	9	0	334	FALSE	0	0
Max. Value Natural	2		9	9	10	0	334	FALSE	0	0
Max. Value Rounded	2		10	10	11	0	334	FALSE	0	0
Bin Parameters			11	11	12	0	334	FALSE	0	0
			12	12	13	0	334	FALSE	0	0
Round Up Bin Width to nearest…	1		13	13	14	0	334	FALSE	0	0
Bin Width Displayed	1	1	14	14	15	0	334	FALSE	0	0
Bin Width User-defined	1	4	15	15	16	0	334	FALSE	0	0
No. of Data Bins Displayed	5		16	16	17	0	334	FALSE	0	0
No. of Data Bins User-defined			17	17	18	0	334	FALSE	0	0
Expected No. of Bins Sturges' rule	8		18 ≤ x	18		0	334	FALSE	0	0							TRUE	5
Enter values into the white cells below to alter histogram appearance			Bin Range	Bin Min	Bin Max	Frequency	Cumulative
			x ≤ -2	-3	-1	0	0	FALSE	0	0
			-1 ≤ x ≤ 0	-1	1	12	12	TRUE	0	12
			1 ≤ x ≤ 2	1	3	57	69	TRUE	0	57
No. of compounds	334		3 ≤ x ≤ 4	3	5	95	164	TRUE	0	95
Axis decimal places (0, 1 or 2)			5 ≤ x ≤ 6	5	7	99	263	TRUE	0	99
Data Range			7 ≤ x ≤ 8	7	9	50	313	TRUE	0	50
			9 ≤ x ≤ 10	9	11	18	331	TRUE	0	18
Round min/max to nearest…	1		11 ≤ x ≤ 12	11	13	1	332	TRUE	0	1
Min. Value Natural	0		13 ≤ x ≤ 14	13	15	1	333	TRUE	0	1
Min. Value Rounded	0		15 ≤ x ≤ 16	15	17	1	334	TRUE	0	1
Leftmost Bin Min. User-defined			17 ≤ x ≤ 18	17	19	0	334	FALSE	0	0
Leftmost Bin Min. Rounded	0		19 ≤ x ≤ 20	19	21	0	334	FALSE	0	0
Max. Value Natural	15		21 ≤ x ≤ 22	21	23	0	334	FALSE	0	0
Max. Value Rounded	15		23 ≤ x ≤ 24	23	25	0	334	FALSE	0	0
Bin Parameters			25 ≤ x ≤ 26	25	27	0	334	FALSE	0	0
			27 ≤ x ≤ 28	27	29	0	334	FALSE	0	0
Round Up Bin Width to nearest…	1		29 ≤ x ≤ 30	29	31	0	334	FALSE	0	0
Bin Width Displayed	2	1.875	31 ≤ x ≤ 32	31	33	0	334	FALSE	0	0
Bin Width User-defined		8	33 ≤ x ≤ 34	33	35	0	334	FALSE	0	0
No. of Data Bins Displayed	9		35 ≤ x ≤ 36	35	37	0	334	FALSE	0	0
No. of Data Bins User-defined			37 ≤ x ≤ 38	37	39	0	334	FALSE	0	0
Expected No. of Bins Sturges' rule	8		39 ≤ x	39		0	334	FALSE	0	0							TRUE
Enter values into the white cells below to alter histogram appearance			Bin Range	Bin Min	Bin Max	Frequency	Cumulative
			x ≤ -1	-1	0	0	0	FALSE	0	0
			0	0	1	5	5	TRUE	0	5
			1	1	2	44	49	TRUE	0	44
No. of compounds	334		2	2	3	60	109	TRUE	0	60
Axis decimal places (0, 1 or 2)	0		3	3	4	55	164	TRUE	0	55
Data Range			4	4	5	47	211	TRUE	0	47
			5	5	6	51	262	TRUE	0	51
Round min/max to nearest…	1		6	6	7	19	281	TRUE	0	19
Min. Value Natural	0		7	7	8	7	288	TRUE	0	7
Min. Value Rounded	0		8	8	9	10	298	TRUE	0	10
Leftmost Bin Min. User-defined			9	9	10	13	311	TRUE	0	13
Leftmost Bin Min. Rounded	0		10	10	11	14	325	TRUE	0	14
Max. Value Natural	12		11	11	12	6	331	TRUE	0	6
Max. Value Rounded	12		12	12	13	3	334	TRUE	0	3
Bin Parameters			13	13	14	0	334	FALSE	0	0
			14	14	15	0	334	FALSE	0	0
Round Up Bin Width to nearest…	1		15	15	16	0	334	FALSE	0	0
Bin Width Displayed	1	1	16	16	17	0	334	FALSE	0	0
Bin Width User-defined	1	12	17	17	18	0	334	FALSE	0	0
No. of Data Bins Displayed	13		18	18	19	0	334	FALSE	0	0
No. of Data Bins User-defined			19	19	20	0	334	FALSE	0	0
Expected No. of Bins Sturges' rule	8		20 ≤ x	20		0	334	FALSE	0	0							TRUE
Enter values into the white cells below to alter histogram appearance			Bin Range	Bin Min	Bin Max	Frequency	Cumulative
			x ≤ -3	-3	-2	0	0	FALSE	0	0
			-2	-2	-1	0	0	FALSE	0	0
			-1	-1	0	0	0	FALSE	0	0
No. of compounds	334		0	0	1	175	175	TRUE	0	0
Axis decimal places (0, 1 or 2)	0		1	1	2	105	280	TRUE	0	0
Data Range			2	2	3	46	326	TRUE	0	0
			3	3	4	7	333	TRUE	0	0
Round min/max to nearest…	1		4	4	5	0	333	TRUE	0	0
Min. Value Natural	0		5	5	6	1	334	TRUE	0	0
Min. Value Rounded	0		6	6	7	0	334	FALSE	0	0
Leftmost Bin Min. User-defined			7	7	8	0	334	FALSE	0	0
Leftmost Bin Min. Rounded	0		8	8	9	0	334	FALSE	0	0
Max. Value Natural	5		9	9	10	0	334	FALSE	0	0
Max. Value Rounded	5		10	10	11	0	334	FALSE	0	0
Bin Parameters			11	11	12	0	334	FALSE	0	0
			12	12	13	0	334	FALSE	0	0
Round Up Bin Width to nearest…	1		13	13	14	0	334	FALSE	0	0
Bin Width Displayed	1	0.625	14	14	15	0	334	FALSE	0	0
Bin Width User-defined		8	15	15	16	0	334	FALSE	0	0
No. of Data Bins Displayed	6		16	16	17	0	334	FALSE	0	0
No. of Data Bins User-defined			17	17	18	0	334	FALSE	0	0
Expected No. of Bins Sturges' rule	8		18 ≤ x	18		0	334	FALSE	0	0							FALSE

## Sheet: Scatter Plots
																255.483	-2.96
			8	9												221.037	-2.51
			AY	Z												249.091	-3.67
																269.767	-3.04
Formal Charge				AI												227.33	-3.04
H-Bond Acceptor Atom Count				AF												241.29	-2.18
H-Bond Donor Site Count				AG												269.767	-3.26
Log D				AP												361.657	-5.63
Log P — Experimental				BC												369.375	-3.32
Log P — Experimental & Calculated				BD												264.664	-4.41
Log S — Experimental				AX												56.0633	0.57
Log S — Experimental & Calculated				AY												173.64	-0.95
Molar Mass (Da)				Z												323.384	-3.03
Topological Polar Surface Area (Å²)				AH												213.621	-1.8
Proportion of Aromatic Atoms				AD												207.014	-2.02
Rotatable Bond Count				AE												304.302	-4.3
																84.08	0.52
																367.852	-5.51
																230.241	-1.66
																215.683	-3.55
																338.189	-4.14
																424.395	-2.61
																355.327	-4.98
																243.667	-2.61
																271.72	-3.18
																335.279	-5.53
																256.318	-3.21
																410.402	-4.16
																397.513	-4.2
																240.279	-2.68
																257.78	-4.16
																506.471	-6.4
																446.967	-5.71
																431.312	-5.95
	No. of Unfiltered Points Displayed:		0													399.361	-3.6
	No. of Filtered Points Displayed:		334													342.131	-5.85
																323.283	-2.04
																430.368	-3.11
																261.116	-1.91
																312.245	-4.98
																461.019	-5.34
																276.913	-3.33
																311.847	-4.19
																474.815	-6.04
																332.356	-4.91
																309.831	-4.33
																295.334	-4.44
																399.523	-5
																217.371	-3.68
																350.436	-3.15
																236.267	-1.83
																412.191	-5.12
																314.121	-5.55
																206.026	-2.47
																293.545	-3.26
																260.672	-4.18
																414.821	-4.52
																212.676	-2.87
																290.745	-4.89
																261.704	-3.34
																213.661	-3.38
																357.773	-4.14
																331.964	-5.6
																206.092	-4.11
																394.249	-5.34
																274.398	-5.87
																413.406	-3.6
																359.911	-4.48
																311.693	-3.92
																349.741	-4.74
																239.698	-2.33
																324.202	-5.42
																192	-1.64
																429.811	-4.27
																302.799	-5.11
																240.693	-3.15
																215.356	-3.4
																421.428	-4.34
																325.466	-3.67
																357.375	-5.01
																142.969	-1.56
																162.276	-2.13
																300.309	-4.05
																213.303	-3.17
																270.219	-4.03
																221.037	-1.7
																172.011	-4.24
																235.064	-2.45
																341.186	-5.63
																406.22	-4.3
																311.804	-3.73
																249.33	-4.39
																394.295	-5.11
																334.278	-4.37
																338.789	-3.42
																263.398	-4.42
																255.741	-2.6
																255.383	-4.25
																275.795	-3.47
																137.997	0.27
																322.24	-5.47
																240.213	-3.38
																240.213	-3.39
																239.312	-2.98
																184.236	-6.07
																401.415	-4.68
																233.095	-3.76
																198.133	-2.84
																137.955	-0.08
																268.353	-4.3
																184.147	-0.27
																189.318	-2.3
																265.414	-4.5
																333.263	-5.33
																410.405	-4.22
																264.325	-2.11
																161.265	-1.13
																286.344	-3.09
																451.221	-5.89
																398.391	-3.4
																340.201	-5.35
																333.723	-3.74
																361.776	-4.12
																366.26	-4.82
																349.815	-3.67
																164.204	-1.6
																363.81	-5.09
																335.757	-4.82
																407.325	-3.74
																359.284	-3.76
																327.255	-4.09
																383.362	-5.09
																443.619	-5.29
																395.292	-4.1
																487.459	-3.73
																355.698	-5.91
																363.331	-4.42
																408.732	-5.51
																325.294	-3.65
																423.862	-5.1
																354.332	-3.95
																232.202	-3.43
																447.747	-5.94
																460.785	-5.5
																390.742	-5.85
																145.033	-1.64
																465.361	-4.18
																329.316	-4.44
																312.115	-4.04
																255.031	-2.47
																333.305	-4.76
																403.879	-4.15
																437.756	-5.91
																452.442	-4.4
																152.066	-0.63
																180.119	-0.59
																169.073	-1
																470.78	-5.73
																434.812	-3.3
																375.727	-4.72
																252.313	-1.52
																288.342	-3.67
																305.329	-3.14
																275.303	-3
																261.276	-2.78
																311.335	-3.71
																289.33	-3.14
																412.808	-4.27
																340.8	-5.38
																301.362	-3.73
																507.26	-3.12
																449.224	-2.97
																370.914	-3.61
																427.232	-5.47
																309.361	-6.45
																206.284	-3.54
																211.261	-2.44
																332.394	-3.94
																325.767	-3.77
																359.32	-3.88
																383.226	-3.24
																279.335	-2.93
																461.773	-6.18
																234.294	-1.72
																249.094	-3.52
																200.619	-2.23
																244.738	-3.72
																228.672	-3.12
																214.646	-2.55
																298.36	-4.09
																310.293	-3.24
																489.48	-3.97
																339.321	-4.08
																106.19	-1.6
																202.213	-2.62
																277.749	-2.74
																475.864	-3.19
																221.279	-2.83
																261.062	-2.82
																337.384	-5.09
																271.382	-3.85
																240.297	-4.66
																268.353	-3.65
																400.468	-4.72
																259.1	-2.9
																283.794	-2.73
																418.255	-4.32
																228.675	-2.71
																214.288	-2.2
																381.364	-4.29
																187.302	-2.1
																239.741	-3.97
																214.649	-2.57
																198.649	-2.89
																138.963	0.38
																291.344	-5.32
																271.354	-3.57
																291.301	-4.89
																431.426	-3.81
																275.174	-4.77
																410.405	-4.11
																284.095	-5.46
																303.668	-4.04
																251.254	-1.43
																282.461	-6.37
																257.78	-4.18
																424.432	-4.57
																346.36	-5.16
																341.189	-4.61
																345.221	-5.69
																406.413	-4.2
																376.276	-5.19
																361.7	-5.67
																186.252	-5.83
																203.345	-3.35
																158.238	-2.75
																281.308	-3.94
																483.37	-3.63
																266.337	-4.28
																239.741	-3.98
																353.773	-4.93
																295.804	-3.33
																300.309	-4.18
																241.459	-2.75
																376.304	-5.12
																400.511	-3.28
																353.481	-5.04
																311.847	-4.31
																468.337	-3.97
																350.294	-5.49
																414.212	-3.46
																347.29	-6.54
																466.033	-5.47
																225.291	-3.69
																241.356	-4.1
																211.688	-2.48
																218.08	-3
																443.88	-5.15
																229.71	-4.43
																179.216	-1.97
																283.794	-3.4
																397.384	-3.99
																455.876	-4.29
																256.128	-4.45
																251.388	-4.16
																419.379	-3.63
																314.773	-3.5
																413.176	-4.81
																362.324	-3.37
																439.312	-5.02
																221.643	-2.87
																414.394	-2.91
																403.259	-5.61
																609.586	-5.37
																330.444	-5.08
																206.628	-2.85
																378.916	-5.99
																318.348	-3.71
																361.349	-3.69
																419.4	-3.07
																326.755	-3.91
																391.314	-3.54
																434.35	-3.38
																242.058	-3.51
																221.64	-3.21
																207.613	-2.88
																344.749	-4.24
																372.802	-4.6
																428.866	-4.8
																431.444	-3.91
																500.852	-5.64
																327.482	-3.72
																232.321	-4.11
																201.657	-4.55
																213.303	-3.11
																283.794	-3.43
																328.768	-3.83
																387.19	-4.59
																364.376	-4.68
																168.066	-1.27
																470.48	-4.22
																163.387	-1.89
																225.457	-3.35
																233.349	-3.21
																228.315	-2.89
																440.819	-4.09
																341.83	-3.99
																216.665	-2.48
																277.402	-4.6
																225.291	-3.78
																229.71	-4.15
																241.356	-4
																323.838	-4.84
																240.206	-2.84
																396.375	-4.11
																372.417	-4.22
																376.366	-3.82
																387.392	-3.33
																279.441	-5.05
																363.388	-3.3
																329.433	-4.46
																424.327	-4.08
																304.664	-4.88
																401.825	-4.03
																333.404	-4
																278.309	-3.75
																395.39	-4.22
																256.471	-2.74
																229.71	-4.06
																437.351	-3.48
																335.279	-5.68
																478.403	-4.08
																445.297	-4.02
																203.345	-2.96
																#N/A	#N/A
																#N/A	#N/A
																#N/A	#N/A
																#N/A	#N/A
																#N/A	#N/A
																#N/A	#N/A
																#N/A	#N/A
																#N/A	#N/A
																#N/A	#N/A
																#N/A	#N/A
																#N/A	#N/A
																#N/A	#N/A
																#N/A	#N/A
																#N/A	#N/A
																#N/A	#N/A
																#N/A	#N/A
																#N/A	#N/A
																#N/A	#N/A
																#N/A	#N/A
																#N/A	#N/A
																#N/A	#N/A
																#N/A	#N/A
																#N/A	#N/A
																#N/A	#N/A
																#N/A	#N/A
																#N/A	#N/A
																#N/A	#N/A
																#N/A	#N/A
																#N/A	#N/A
																#N/A	#N/A
																#N/A	#N/A
																#N/A	#N/A
																#N/A	#N/A
																#N/A	#N/A
																#N/A	#N/A
																#N/A	#N/A
																#N/A	#N/A
																#N/A	#N/A
																#N/A	#N/A
																#N/A	#N/A
																#N/A	#N/A
																#N/A	#N/A
																#N/A	#N/A
																#N/A	#N/A
																#N/A	#N/A
																#N/A	#N/A
																#N/A	#N/A
																#N/A	#N/A
																#N/A	#N/A
																#N/A	#N/A
																#N/A	#N/A
																#N/A	#N/A
																#N/A	#N/A
																#N/A	#N/A
																#N/A	#N/A
																#N/A	#N/A
																#N/A	#N/A
																#N/A	#N/A
																#N/A	#N/A
																#N/A	#N/A
																#N/A	#N/A
																#N/A	#N/A
																#N/A	#N/A
																#N/A	#N/A
																#N/A	#N/A
																#N/A	#N/A
																#N/A	#N/A
																#N/A	#N/A
																#N/A	#N/A
																#N/A	#N/A
																#N/A	#N/A
																#N/A	#N/A
																#N/A	#N/A
																#N/A	#N/A
																#N/A	#N/A
																#N/A	#N/A
																#N/A	#N/A
																#N/A	#N/A
																#N/A	#N/A
																#N/A	#N/A
																#N/A	#N/A
																#N/A	#N/A
																#N/A	#N/A
																#N/A	#N/A
																#N/A	#N/A
																#N/A	#N/A
																#N/A	#N/A
																#N/A	#N/A
																#N/A	#N/A
																#N/A	#N/A
																#N/A	#N/A
																#N/A	#N/A
																#N/A	#N/A
																#N/A	#N/A
																#N/A	#N/A
																#N/A	#N/A
																#N/A	#N/A
																#N/A	#N/A
																#N/A	#N/A
																#N/A	#N/A
																#N/A	#N/A
																#N/A	#N/A
																#N/A	#N/A
																#N/A	#N/A
																#N/A	#N/A
																#N/A	#N/A
																#N/A	#N/A
																#N/A	#N/A
																#N/A	#N/A
																#N/A	#N/A
																#N/A	#N/A
																#N/A	#N/A
																#N/A	#N/A
																#N/A	#N/A
																#N/A	#N/A
																#N/A	#N/A
																#N/A	#N/A
																#N/A	#N/A
																#N/A	#N/A
																#N/A	#N/A
																#N/A	#N/A
																#N/A	#N/A
																#N/A	#N/A
																#N/A	#N/A
																#N/A	#N/A
																#N/A	#N/A
																#N/A	#N/A
																#N/A	#N/A
																#N/A	#N/A
																#N/A	#N/A
																#N/A	#N/A
																#N/A	#N/A
																#N/A	#N/A
																#N/A	#N/A
																#N/A	#N/A
																#N/A	#N/A
																#N/A	#N/A
																#N/A	#N/A
																#N/A	#N/A
																#N/A	#N/A
																#N/A	#N/A
																#N/A	#N/A
																#N/A	#N/A
																#N/A	#N/A
																#N/A	#N/A
																#N/A	#N/A
																#N/A	#N/A
																#N/A	#N/A
																#N/A	#N/A
																#N/A	#N/A
																#N/A	#N/A
																#N/A	#N/A
																#N/A	#N/A
																#N/A	#N/A
																#N/A	#N/A
																#N/A	#N/A
																#N/A	#N/A
																#N/A	#N/A
																#N/A	#N/A
																#N/A	#N/A
																#N/A	#N/A
																#N/A	#N/A
																#N/A	#N/A
																#N/A	#N/A
																#N/A	#N/A
																#N/A	#N/A
																#N/A	#N/A
																#N/A	#N/A
																#N/A	#N/A
																#N/A	#N/A
																#N/A	#N/A
																#N/A	#N/A
																#N/A	#N/A
																#N/A	#N/A
																#N/A	#N/A
																#N/A	#N/A
																#N/A	#N/A
																#N/A	#N/A
																#N/A	#N/A
																#N/A	#N/A
																#N/A	#N/A
																#N/A	#N/A
																#N/A	#N/A
																#N/A	#N/A
																#N/A	#N/A
																#N/A	#N/A
																#N/A	#N/A
																#N/A	#N/A
																#N/A	#N/A
																#N/A	#N/A
																#N/A	#N/A
																#N/A	#N/A
																#N/A	#N/A
																#N/A	#N/A
																#N/A	#N/A
																#N/A	#N/A
																#N/A	#N/A
																#N/A	#N/A
																#N/A	#N/A
																#N/A	#N/A
																#N/A	#N/A
																#N/A	#N/A
																#N/A	#N/A
																#N/A	#N/A
																#N/A	#N/A
																#N/A	#N/A
																#N/A	#N/A
																#N/A	#N/A
																#N/A	#N/A
																#N/A	#N/A
																#N/A	#N/A
																#N/A	#N/A
																#N/A	#N/A
																#N/A	#N/A
																#N/A	#N/A
																#N/A	#N/A
																#N/A	#N/A
																#N/A	#N/A
																#N/A	#N/A
																#N/A	#N/A
																#N/A	#N/A
																#N/A	#N/A
																#N/A	#N/A
																#N/A	#N/A
																#N/A	#N/A
																#N/A	#N/A
																#N/A	#N/A
																#N/A	#N/A
																#N/A	#N/A
																#N/A	#N/A
																#N/A	#N/A
																#N/A	#N/A
																#N/A	#N/A
																#N/A	#N/A
																#N/A	#N/A
																#N/A	#N/A
																#N/A	#N/A
																#N/A	#N/A
																#N/A	#N/A
																#N/A	#N/A
																#N/A	#N/A
																#N/A	#N/A
																#N/A	#N/A
																#N/A	#N/A
																#N/A	#N/A
																#N/A	#N/A
																#N/A	#N/A
																#N/A	#N/A
																#N/A	#N/A
																#N/A	#N/A
																#N/A	#N/A
																#N/A	#N/A
																#N/A	#N/A
																#N/A	#N/A
																#N/A	#N/A
																#N/A	#N/A
																#N/A	#N/A
																#N/A	#N/A
																#N/A	#N/A
																#N/A	#N/A
																#N/A	#N/A
																#N/A	#N/A
																#N/A	#N/A
																#N/A	#N/A
																#N/A	#N/A
																#N/A	#N/A
																#N/A	#N/A
																#N/A	#N/A
																#N/A	#N/A
																#N/A	#N/A
																#N/A	#N/A
																#N/A	#N/A
																#N/A	#N/A
																#N/A	#N/A
																#N/A	#N/A
																#N/A	#N/A
																#N/A	#N/A
																#N/A	#N/A
																#N/A	#N/A
																#N/A	#N/A
																#N/A	#N/A
																#N/A	#N/A
																#N/A	#N/A
																#N/A	#N/A
																#N/A	#N/A
																#N/A	#N/A
																#N/A	#N/A
																#N/A	#N/A
																#N/A	#N/A
																#N/A	#N/A
																#N/A	#N/A
																#N/A	#N/A
																#N/A	#N/A
																#N/A	#N/A
																#N/A	#N/A
																#N/A	#N/A
																#N/A	#N/A
																#N/A	#N/A
																#N/A	#N/A
																#N/A	#N/A
																#N/A	#N/A
																#N/A	#N/A
																#N/A	#N/A
																#N/A	#N/A
																#N/A	#N/A
																#N/A	#N/A
																#N/A	#N/A
																#N/A	#N/A
																#N/A	#N/A
																#N/A	#N/A
																#N/A	#N/A
																#N/A	#N/A
																#N/A	#N/A
																#N/A	#N/A
																#N/A	#N/A
																#N/A	#N/A
																#N/A	#N/A
																#N/A	#N/A
																#N/A	#N/A
																#N/A	#N/A
																#N/A	#N/A
																#N/A	#N/A
																#N/A	#N/A
																#N/A	#N/A
																#N/A	#N/A
																#N/A	#N/A
																#N/A	#N/A
																#N/A	#N/A
																#N/A	#N/A
																#N/A	#N/A
																#N/A	#N/A
																#N/A	#N/A
																#N/A	#N/A
																#N/A	#N/A
																#N/A	#N/A
																#N/A	#N/A
																#N/A	#N/A
																#N/A	#N/A
																#N/A	#N/A
																#N/A	#N/A
																#N/A	#N/A
																#N/A	#N/A
																#N/A	#N/A
																#N/A	#N/A
																#N/A	#N/A
																#N/A	#N/A
																#N/A	#N/A
																#N/A	#N/A
																#N/A	#N/A
																#N/A	#N/A
																#N/A	#N/A
																#N/A	#N/A
																#N/A	#N/A
																#N/A	#N/A
																#N/A	#N/A
																#N/A	#N/A
																#N/A	#N/A
																#N/A	#N/A
																#N/A	#N/A
																#N/A	#N/A
																#N/A	#N/A
																#N/A	#N/A
																#N/A	#N/A
																#N/A	#N/A
																#N/A	#N/A
																#N/A	#N/A
																#N/A	#N/A
																#N/A	#N/A
																#N/A	#N/A
																#N/A	#N/A
																#N/A	#N/A
																#N/A	#N/A
																#N/A	#N/A
																#N/A	#N/A
																#N/A	#N/A
																#N/A	#N/A
																#N/A	#N/A
																#N/A	#N/A
																#N/A	#N/A
																#N/A	#N/A
																#N/A	#N/A
																#N/A	#N/A
																#N/A	#N/A
																#N/A	#N/A
																#N/A	#N/A
																#N/A	#N/A
																#N/A	#N/A
																#N/A	#N/A
																#N/A	#N/A
																#N/A	#N/A
																#N/A	#N/A
																#N/A	#N/A
																#N/A	#N/A
																#N/A	#N/A
																#N/A	#N/A
																#N/A	#N/A
																#N/A	#N/A
																#N/A	#N/A
																#N/A	#N/A
																#N/A	#N/A
																#N/A	#N/A
																#N/A	#N/A
																#N/A	#N/A
																#N/A	#N/A
																#N/A	#N/A
																#N/A	#N/A
																#N/A	#N/A
																#N/A	#N/A
																#N/A	#N/A
																#N/A	#N/A
																#N/A	#N/A
																#N/A	#N/A
																#N/A	#N/A
																#N/A	#N/A
																#N/A	#N/A
																#N/A	#N/A
																#N/A	#N/A
																#N/A	#N/A
																#N/A	#N/A
																#N/A	#N/A
																#N/A	#N/A
																#N/A	#N/A
																#N/A	#N/A
																#N/A	#N/A
																#N/A	#N/A
																#N/A	#N/A
																#N/A	#N/A
																#N/A	#N/A
																#N/A	#N/A
																#N/A	#N/A
																#N/A	#N/A
																#N/A	#N/A
																#N/A	#N/A
																#N/A	#N/A
																#N/A	#N/A
																#N/A	#N/A
																#N/A	#N/A
																#N/A	#N/A
																#N/A	#N/A
																#N/A	#N/A
																#N/A	#N/A
																#N/A	#N/A
																#N/A	#N/A
																#N/A	#N/A
																#N/A	#N/A
																#N/A	#N/A
																#N/A	#N/A
																#N/A	#N/A
																#N/A	#N/A
																#N/A	#N/A
																#N/A	#N/A
																#N/A	#N/A
																#N/A	#N/A
																#N/A	#N/A
																#N/A	#N/A
																#N/A	#N/A
																#N/A	#N/A
																#N/A	#N/A
																#N/A	#N/A
																#N/A	#N/A
																#N/A	#N/A
																#N/A	#N/A
																#N/A	#N/A
																#N/A	#N/A
																#N/A	#N/A
																#N/A	#N/A
																#N/A	#N/A
																#N/A	#N/A
																#N/A	#N/A
																#N/A	#N/A
																#N/A	#N/A
																#N/A	#N/A
																#N/A	#N/A
																#N/A	#N/A
																#N/A	#N/A
																#N/A	#N/A
																#N/A	#N/A
																#N/A	#N/A
																#N/A	#N/A
																#N/A	#N/A
																#N/A	#N/A
																#N/A	#N/A
																#N/A	#N/A
																#N/A	#N/A
																#N/A	#N/A
																#N/A	#N/A
																#N/A	#N/A
																#N/A	#N/A
																#N/A	#N/A
																#N/A	#N/A
																#N/A	#N/A
																#N/A	#N/A
																#N/A	#N/A
																#N/A	#N/A
																#N/A	#N/A
																#N/A	#N/A
																#N/A	#N/A
																#N/A	#N/A
																#N/A	#N/A
																#N/A	#N/A
																#N/A	#N/A
																#N/A	#N/A
																#N/A	#N/A
																#N/A	#N/A
																#N/A	#N/A
																#N/A	#N/A
																#N/A	#N/A
																#N/A	#N/A
																#N/A	#N/A
																#N/A	#N/A
																#N/A	#N/A
																#N/A	#N/A
																#N/A	#N/A
																#N/A	#N/A
																#N/A	#N/A
																#N/A	#N/A
																#N/A	#N/A
																#N/A	#N/A
																#N/A	#N/A
																#N/A	#N/A
																#N/A	#N/A
																#N/A	#N/A
																#N/A	#N/A
																#N/A	#N/A
																#N/A	#N/A
																#N/A	#N/A
																#N/A	#N/A
																#N/A	#N/A
																#N/A	#N/A
																#N/A	#N/A
																#N/A	#N/A
																#N/A	#N/A
																#N/A	#N/A
																#N/A	#N/A
																#N/A	#N/A
																#N/A	#N/A
																#N/A	#N/A
																#N/A	#N/A
																#N/A	#N/A
																#N/A	#N/A
																#N/A	#N/A
																#N/A	#N/A
																#N/A	#N/A
																#N/A	#N/A
																#N/A	#N/A
																#N/A	#N/A
																#N/A	#N/A
																#N/A	#N/A
																#N/A	#N/A
																#N/A	#N/A
																#N/A	#N/A
																#N/A	#N/A
																#N/A	#N/A
																#N/A	#N/A
																#N/A	#N/A
																#N/A	#N/A
																#N/A	#N/A
																#N/A	#N/A
																#N/A	#N/A
																#N/A	#N/A
																#N/A	#N/A
																#N/A	#N/A
																#N/A	#N/A
																#N/A	#N/A
																#N/A	#N/A
																#N/A	#N/A
																#N/A	#N/A
																#N/A	#N/A
																#N/A	#N/A
																#N/A	#N/A
																#N/A	#N/A
																#N/A	#N/A
																#N/A	#N/A
																#N/A	#N/A
																#N/A	#N/A
																#N/A	#N/A
																#N/A	#N/A
																#N/A	#N/A
																#N/A	#N/A
																#N/A	#N/A
																#N/A	#N/A
																#N/A	#N/A
																#N/A	#N/A
																#N/A	#N/A
																#N/A	#N/A
																#N/A	#N/A
																#N/A	#N/A
																#N/A	#N/A
																#N/A	#N/A
																#N/A	#N/A
																#N/A	#N/A
																#N/A	#N/A
																#N/A	#N/A
																#N/A	#N/A
																#N/A	#N/A
																#N/A	#N/A
																#N/A	#N/A
																#N/A	#N/A
																#N/A	#N/A
																#N/A	#N/A
																#N/A	#N/A
																#N/A	#N/A
																#N/A	#N/A
																#N/A	#N/A
																#N/A	#N/A
																#N/A	#N/A
																#N/A	#N/A
																#N/A	#N/A
																#N/A	#N/A
																#N/A	#N/A
																#N/A	#N/A
																#N/A	#N/A
																#N/A	#N/A
																#N/A	#N/A
																#N/A	#N/A
																#N/A	#N/A
																#N/A	#N/A
																#N/A	#N/A
																#N/A	#N/A
																#N/A	#N/A
																#N/A	#N/A
																#N/A	#N/A
																#N/A	#N/A
																#N/A	#N/A
																#N/A	#N/A
																#N/A	#N/A
																#N/A	#N/A
																#N/A	#N/A
																#N/A	#N/A
																#N/A	#N/A
																#N/A	#N/A
																#N/A	#N/A
																#N/A	#N/A
																#N/A	#N/A
																#N/A	#N/A
																#N/A	#N/A
																#N/A	#N/A
																#N/A	#N/A
																#N/A	#N/A
																#N/A	#N/A
																#N/A	#N/A
																#N/A	#N/A
																#N/A	#N/A
																#N/A	#N/A
																#N/A	#N/A
																#N/A	#N/A
																#N/A	#N/A
																#N/A	#N/A
																#N/A	#N/A
																#N/A	#N/A
																#N/A	#N/A
																#N/A	#N/A
																#N/A	#N/A
																#N/A	#N/A
																#N/A	#N/A
																#N/A	#N/A
																#N/A	#N/A
																#N/A	#N/A
																#N/A	#N/A
																#N/A	#N/A
																#N/A	#N/A
																#N/A	#N/A
																#N/A	#N/A
																#N/A	#N/A
																#N/A	#N/A
																#N/A	#N/A
